# Supplementary material for: Single-Cell Transcriptional Response of the Placenta to the Ablation of Caveolin-1: Insights into the Adaptive Regulation of Brain–Placental Axis in Mice
Source: MDPI journal article supplement (doi:10.3390/cells13030215), 2024-01-24
Supplement: s1 [file s1]

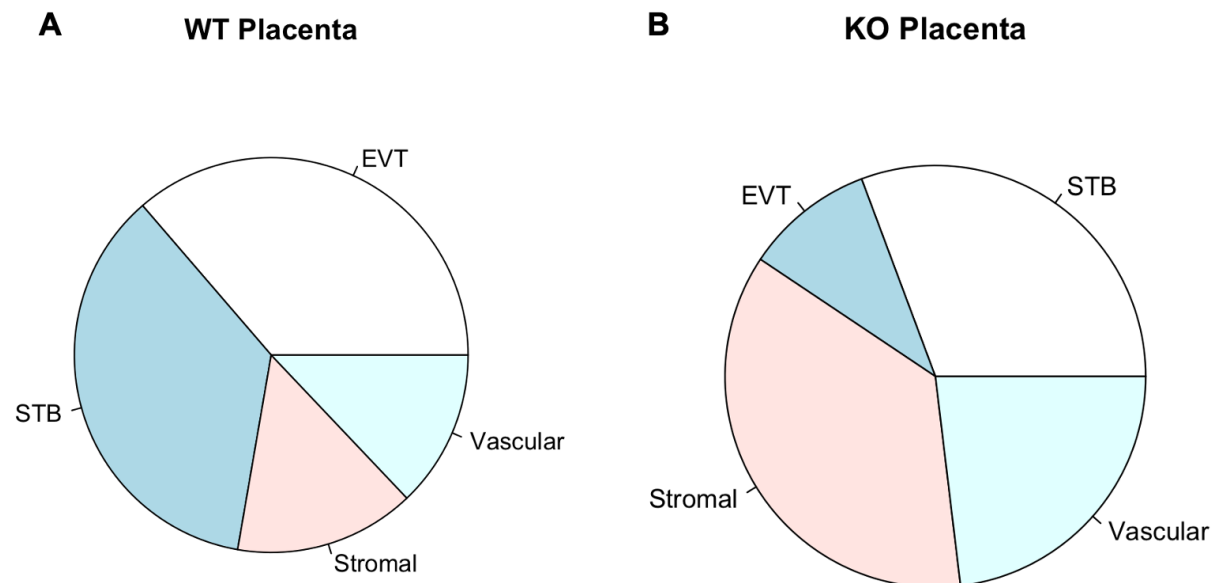

**Supplementary Figure S1.** Differential proportion of EVT, stromal and vascular cells, but not STB cells, between WT (A) and KO (B) placenta .

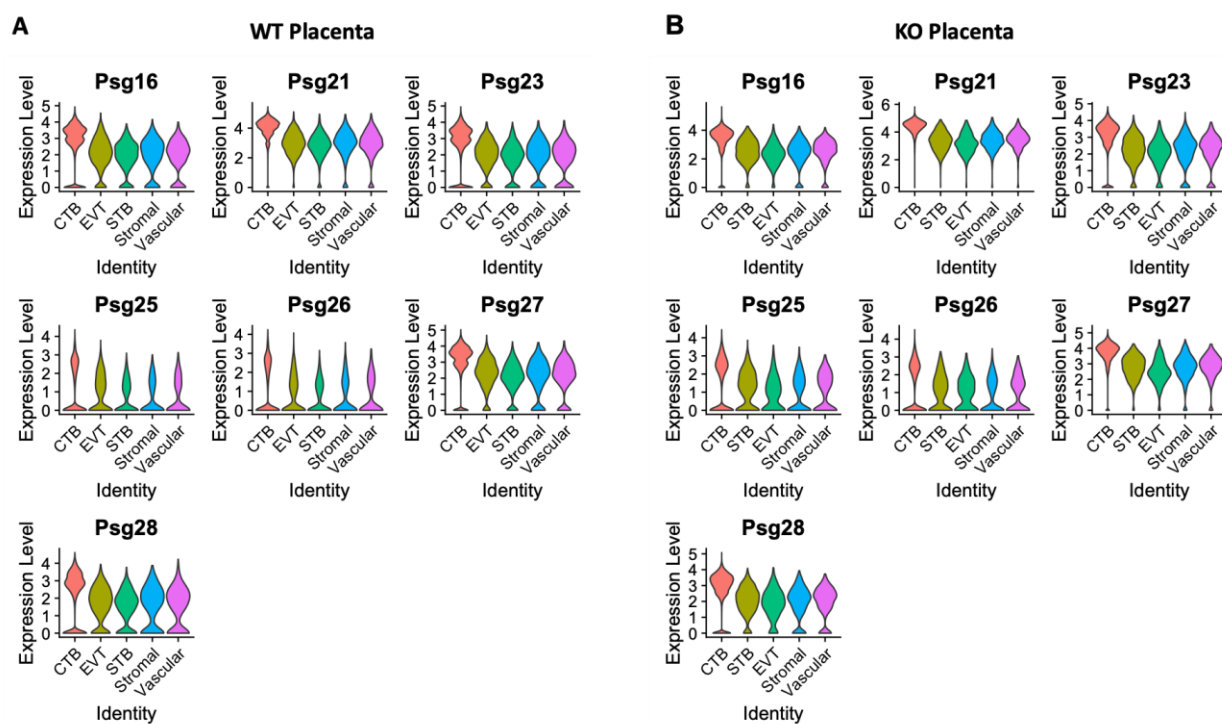

**Supplementary Figure S2.** Violin plots showing expression changes of pregnancy-associated glycoprotein (*Psg*) genes among the placental cells. The cell types are shown in the x-axis and expression level is shown in the y-axis. The cell types are color coded.
