# Supplementary material for: Single-Cell Transcriptional Response of the Placenta to the Ablation of Caveolin-1: Insights into the Adaptive Regulation of Brain–Placental Axis in Mice
Source: Cells. 2024 Jan 24;13(3):215. doi: 10.3390/cells13030215 (PMC10854826; doi:10.3390/cells13030215)
Supplement: Supplementary file 1 [file cells-13-00215-s001.zip]

Archive with 4 entries (4 files):
- Supplemenatry Table S1.xlsx
- Supplemenatry Table S2.xlsx
- Supplemenatry Table S3.xlsx
- Supplementary Figures.pdf
