# Supplementary material for: Single-Cell Transcriptional Response of the Placenta to the Ablation of Caveolin-1: Insights into the Adaptive Regulation of Brain–Placental Axis in Mice
Source: Cells. 2024 Jan 24;13(3):215. doi: 10.3390/cells13030215 (PMC10854826; doi:10.3390/cells13030215)
Supplement: Supplementary file 1 [file cells-13-00215-s001.zip › Supplemenatry Table S1.xlsx]

## Sheet: Sheet1
List of marker genes differentially expressed in specific cell types of WT and KO mice.
Gene	Cell type	avg_log2FC.WT	p_val_adj.WT	avg_log2FC.KO	p_val_adj.KO	WT expression	KO expression	Group pattern
0610010F05Rik	CTB	-0.465027	0	-0.440064	0	WTd	KOd	WTd-KOd
0610010F05Rik	EVT	0.651341	0	0.620409	7.32587e-102	WTu	KOu	WTu-KOu
1110019D14Rik	EVT	0.331831	1.77509e-213	0.316609	1.87833e-111	WTu	KOu	WTu-KOu
1110051M20Rik	Stromal	0.51764	3.05244e-88	0.374722	8.48603e-158	WTu	KOu	WTu-KOu
1110051M20Rik	CTB	-0.350649	0	-0.356265	0	WTd	KOd	WTd-KOd
1110059E24Rik	Vascular	0.440806	1.20018e-34	0.337211	8.69772e-43	WTu	KOu	WTu-KOu
1110059E24Rik	CTB	-0.258327	5.82437e-288	-0.297245	2.05867e-282	WTd	KOd	WTd-KOd
1110059E24Rik	Stromal	0.363941	1.91428e-36	0.277055	2.31014e-48	WTu	KOu	WTu-KOu
1500004A13Rik	CTB	-0.324079	0	-0.283314	0	WTd	KOd	WTd-KOd
1600010M07Rik	CTB	-0.518188	0	-0.517514	0	WTd	KOd	WTd-KOd
1600010M07Rik	Stromal	0.261253	2.35717e-11	0.698375	2.94415e-235	WTu	KOu	WTu-KOu
1600010M07Rik	EVT	0.369354	7.84926e-175	0.47606	2.24955e-109	WTu	KOu	WTu-KOu
1600010M07Rik	STB	0.733746	0	0.335406	1.18932e-213	WTu	KOu	WTu-KOu
1600012P17Rik	CTB	1.27135	0	1.22608	0	WTu	KOu	WTu-KOu
1600012P17Rik	Vascular	-1.1483	2.50864e-71	-1.1076	6.58659e-168	WTd	KOd	WTd-KOd
1600012P17Rik	STB	-1.38692	2.05987e-264	-1.08222	5.03516e-220	WTd	KOd	WTd-KOd
1600012P17Rik	EVT	-1.03524	5.64803e-177	-1.46596	9.56315e-100	WTd	KOd	WTd-KOd
1600012P17Rik	Stromal	-1.08215	1.53279e-75	-1.13386	9.54983e-275	WTd	KOd	WTd-KOd
1600020E01Rik	CTB	-0.289195	0	-0.258233	0	WTd	KOd	WTd-KOd
1600020E01Rik	EVT	0.299984	3.13152e-198	0.352128	6.94169e-123	WTu	KOu	WTu-KOu
1700025G04Rik	STB	0.909038	2.42534e-75	2.15223	1.31097e-262	WTu	KOu	WTu-KOu
1700025G04Rik	CTB	-1.0523	1.9743e-179	-1.01213	1.03896e-152	WTd	KOd	WTd-KOd
1700027A15Rik	EVT	0.492	0	1.72217	0	WTu	KOu	WTu-KOu
1810013L24Rik	CTB	-0.257991	0	-0.290202	2.98479e-298	WTd	KOd	WTd-KOd
1810013L24Rik	EVT	0.28373	3.79776e-143	0.523697	1.69661e-60	WTu	KOu	WTu-KOu
1810013L24Rik	STB	0.31346	7.37535e-144	0.406895	1.92193e-175	WTu	KOu	WTu-KOu
1810037I17Rik	STB	-0.323627	2.75582e-06	-0.289296	3.61433e-06	WTd	KOd	WTd-KOd
1810037I17Rik	CTB	0.328137	1.91957e-18	0.252397	5.87764e-20	WTu	KOu	WTu-KOu
1810058I24Rik	STB	-0.269295	1.25854e-13	-0.421883	6.39087e-05	WTd	KOd	WTd-KOd
1810058I24Rik	CTB	0.337238	7.53325e-19	0.308769	2.65172e-23	WTu	KOu	WTu-KOu
2210408I21Rik	EVT	0.593133	4.09903e-269	0.834361	6.10337e-179	WTu	KOu	WTu-KOu
2210408I21Rik	CTB	-0.633288	0	-0.631343	0	WTd	KOd	WTd-KOd
2210408I21Rik	STB	0.63591	1.16941e-290	0.656021	0	WTu	KOu	WTu-KOu
2210408I21Rik	Stromal	0.362876	1.93316e-23	0.432098	2.13394e-90	WTu	KOu	WTu-KOu
2210408I21Rik	Vascular	0.385364	8.96727e-13	0.455789	7.99e-54	WTu	KOu	WTu-KOu
2310014F06Rik	EVT	0.278431	2.26634e-186	0.709125	0	WTu	KOu	WTu-KOu
2410018L13Rik	EVT	0.290031	1.25463e-232	0.401691	2.07224e-137	WTu	KOu	WTu-KOu
2510009E07Rik	Stromal	0.288293	5.72659e-30	0.302164	2.02102e-102	WTu	KOu	WTu-KOu
2510009E07Rik	Vascular	0.62254	1.20622e-89	0.508685	1.50767e-109	WTu	KOu	WTu-KOu
2610005L07Rik	CTB	-0.384409	0	-0.396602	0	WTd	KOd	WTd-KOd
2610005L07Rik	EVT	0.426653	0	0.304577	6.69904e-85	WTu	KOu	WTu-KOu
2610005L07Rik	STB	0.339989	9.74413e-155	0.490478	0	WTu	KOu	WTu-KOu
2610008E11Rik	Vascular	0.604966	1.2735e-65	0.755554	2.61554e-265	WTu	KOu	WTu-KOu
2610008E11Rik	CTB	-0.287884	1.16981e-256	-0.339426	0	WTd	KOd	WTd-KOd
2610020C07Rik	CTB	-0.357099	0	-0.35028	0	WTd	KOd	WTd-KOd
2610020C07Rik	EVT	0.383157	9.36848e-280	0.583823	3.81779e-196	WTu	KOu	WTu-KOu
2610020C07Rik	STB	0.35031	5.82962e-172	0.33803	2.16036e-294	WTu	KOu	WTu-KOu
2610035D17Rik	CTB	-0.743726	0	-0.701992	0	WTd	KOd	WTd-KOd
2610035D17Rik	STB	0.729327	0	0.795423	0	WTu	KOu	WTu-KOu
2610035D17Rik	Stromal	0.679492	1.94071e-32	0.72213	2.07133e-192	WTu	KOu	WTu-KOu
2610037D02Rik	Vascular	0.711775	2.93254e-67	0.673999	1.6008e-133	WTu	KOu	WTu-KOu
2610037D02Rik	CTB	-0.750656	0	-0.747836	0	WTd	KOd	WTd-KOd
2610037D02Rik	EVT	0.685891	0	0.935701	5.76884e-255	WTu	KOu	WTu-KOu
2610037D02Rik	STB	0.513157	2.72249e-262	0.585812	0	WTu	KOu	WTu-KOu
2610037D02Rik	Stromal	0.778487	8.32332e-96	0.602902	1.01176e-194	WTu	KOu	WTu-KOu
2610203C22Rik	Vascular	0.781685	2.08267e-296	0.657784	0	WTu	KOu	WTu-KOu
2610307P16Rik	EVT	1.82762	0	0.266153	7.68084e-70	WTu	KOu	WTu-KOu
2610307P16Rik	CTB	-0.990637	0	-0.931825	0	WTd	KOd	WTd-KOd
2610507B11Rik	Stromal	0.338235	1.99418e-16	0.280577	5.97399e-71	WTu	KOu	WTu-KOu
2700049A03Rik	CTB	-0.257925	1.77532e-265	-0.265326	1.56257e-288	WTd	KOd	WTd-KOd
2810403D21Rik	Vascular	0.358575	7.03177e-22	0.269008	9.09057e-29	WTu	KOu	WTu-KOu
2810403D21Rik	CTB	-0.326753	0	-0.389325	0	WTd	KOd	WTd-KOd
2810403D21Rik	EVT	0.344317	2.52073e-190	0.855708	2.25414e-159	WTu	KOu	WTu-KOu
2900026A02Rik	Vascular	0.846277	1.88661e-72	0.516844	1.24319e-76	WTu	KOu	WTu-KOu
2900026A02Rik	STB	0.353818	1.00434e-68	0.508072	9.6648e-87	WTu	KOu	WTu-KOu
3110056K07Rik	CTB	-0.358192	0	-0.293423	0	WTd	KOd	WTd-KOd
3110056K07Rik	EVT	0.381141	1.8493e-249	0.268319	1.554e-72	WTu	KOu	WTu-KOu
3110056K07Rik	STB	0.300555	7.21862e-150	0.343143	5.50609e-272	WTu	KOu	WTu-KOu
4632427E13Rik	Stromal	0.580248	6.27748e-54	0.636157	3.6307e-225	WTu	KOu	WTu-KOu
4632427E13Rik	STB	0.775448	0	0.771036	0	WTu	KOu	WTu-KOu
4632427E13Rik	CTB	-0.746329	0	-0.75656	0	WTd	KOd	WTd-KOd
4632427E13Rik	EVT	0.525416	0	0.413909	1.04923e-75	WTu	KOu	WTu-KOu
4632427E13Rik	Vascular	0.649671	8.97969e-52	0.649057	3.79403e-122	WTu	KOu	WTu-KOu
4833420G17Rik	STB	0.363803	4.56738e-155	0.373227	6.85391e-224	WTu	KOu	WTu-KOu
4833420G17Rik	Vascular	0.4137	3.36306e-21	0.407624	5.02743e-53	WTu	KOu	WTu-KOu
4833420G17Rik	CTB	-0.407645	0	-0.464518	0	WTd	KOd	WTd-KOd
4833420G17Rik	Stromal	0.328432	1.21024e-28	0.404196	4.47353e-93	WTu	KOu	WTu-KOu
4833420G17Rik	EVT	0.339652	1.39291e-173	0.543224	3.19406e-109	WTu	KOu	WTu-KOu
4921511C10Rik	CTB	-0.386771	0	-0.287907	0	WTd	KOd	WTd-KOd
4921511C10Rik	EVT	0.523096	0	0.296091	3.49028e-84	WTu	KOu	WTu-KOu
4930402H24Rik	CTB	-0.833659	0	-0.814216	0	WTd	KOd	WTd-KOd
4930402H24Rik	Stromal	0.756157	6.29402e-67	0.670349	4.23455e-160	WTu	KOu	WTu-KOu
4930402H24Rik	STB	0.942497	0	0.749866	0	WTu	KOu	WTu-KOu
4930402H24Rik	Vascular	0.81823	1.89654e-61	0.871916	5.88928e-157	WTu	KOu	WTu-KOu
4930402H24Rik	EVT	0.383003	1.02635e-188	0.274363	1.09711e-48	WTu	KOu	WTu-KOu
4930503L19Rik	Vascular	0.635653	1.41154e-133	0.622583	1.13161e-254	WTu	KOu	WTu-KOu
4930523C07Rik	Stromal	0.524993	6.10187e-71	0.355211	2.20268e-83	WTu	KOu	WTu-KOu
4932438A13Rik	Stromal	0.357256	1.25396e-29	0.359823	1.03647e-78	WTu	KOu	WTu-KOu
4932438A13Rik	Vascular	0.741882	3.4208e-56	0.602156	9.16023e-90	WTu	KOu	WTu-KOu
4932438A13Rik	EVT	0.778636	1.46876e-191	1.61188	7.08417e-165	WTu	KOu	WTu-KOu
4932438A13Rik	STB	0.778464	1.15186e-199	0.988951	3.32311e-210	WTu	KOu	WTu-KOu
4932438A13Rik	CTB	-0.834029	0	-0.915982	0	WTd	KOd	WTd-KOd
5031425E22Rik	Vascular	0.718416	3.27145e-50	0.934038	7.91717e-197	WTu	KOu	WTu-KOu
5031425E22Rik	CTB	-1.19836	0	-1.30679	0	WTd	KOd	WTd-KOd
5031425E22Rik	STB	0.830251	0	1.41955	0	WTu	KOu	WTu-KOu
5031425E22Rik	EVT	1.34365	0	1.50441	1.39174e-275	WTu	KOu	WTu-KOu
5031425E22Rik	Stromal	0.761908	3.99529e-91	0.751772	2.36719e-223	WTu	KOu	WTu-KOu
5330432J10Rik	Vascular	0.694532	2.7766e-214	0.670394	0	WTu	KOu	WTu-KOu
5330438D12Rik	EVT	0.333829	4.58848e-205	0.291063	8.44906e-62	WTu	KOu	WTu-KOu
5330438D12Rik	CTB	-0.470082	0	-0.424243	0	WTd	KOd	WTd-KOd
5330438D12Rik	Stromal	0.541813	1.17767e-63	0.337016	6.55162e-96	WTu	KOu	WTu-KOu
5330438D12Rik	STB	0.414355	7.11221e-228	0.361374	1.94991e-269	WTu	KOu	WTu-KOu
5330438D12Rik	Vascular	0.43927	8.36242e-28	0.485287	3.0711e-109	WTu	KOu	WTu-KOu
6720427I07Rik	Stromal	0.515067	1.52136e-51	0.298206	4.92408e-52	WTu	KOu	WTu-KOu
6720427I07Rik	Vascular	0.427588	1.76179e-30	0.518737	2.54079e-101	WTu	KOu	WTu-KOu
6720427I07Rik	CTB	-0.532461	0	-0.506125	0	WTd	KOd	WTd-KOd
6720427I07Rik	EVT	0.55587	0	0.344579	2.24675e-88	WTu	KOu	WTu-KOu
6720427I07Rik	STB	0.353897	3.75472e-186	0.583461	0	WTu	KOu	WTu-KOu
6820431F20Rik	STB	0.387386	1.14261e-175	0.634208	0	WTu	KOu	WTu-KOu
6820431F20Rik	Stromal	0.424868	1.33265e-34	0.360247	2.68791e-85	WTu	KOu	WTu-KOu
6820431F20Rik	Vascular	0.368388	6.42091e-25	0.343465	3.27024e-48	WTu	KOu	WTu-KOu
6820431F20Rik	EVT	0.498751	1.08928e-245	0.254626	2.90873e-44	WTu	KOu	WTu-KOu
6820431F20Rik	CTB	-0.494884	0	-0.492921	0	WTd	KOd	WTd-KOd
8030453O22Rik	EVT	0.313561	0	0.291295	2.6917e-94	WTu	KOu	WTu-KOu
8030462N17Rik	Stromal	0.326703	2.25399e-22	0.469261	2.11767e-110	WTu	KOu	WTu-KOu
8030462N17Rik	EVT	0.354143	1.16523e-196	0.299852	8.30538e-63	WTu	KOu	WTu-KOu
8030462N17Rik	Vascular	0.418471	1.45054e-14	0.45047	5.73177e-53	WTu	KOu	WTu-KOu
8030462N17Rik	CTB	-0.447749	0	-0.492084	0	WTd	KOd	WTd-KOd
8030462N17Rik	STB	0.44389	7.27858e-217	0.42513	1.11842e-243	WTu	KOu	WTu-KOu
9530026P05Rik	CTB	-1.18411	0	-1.06086	0	WTd	KOd	WTd-KOd
9530026P05Rik	Stromal	0.25543	2.37242e-22	1.73058	0	WTu	KOu	WTu-KOu
9530052E02Rik	EVT	0.265073	3.33822e-225	0.58331	0	WTu	KOu	WTu-KOu
9630050E16Rik	CTB	-0.294831	0	-0.256825	0	WTd	KOd	WTd-KOd
9930021J03Rik	Vascular	0.754297	2.17276e-66	0.782215	4.0825e-132	WTu	KOu	WTu-KOu
9930021J03Rik	Stromal	0.480949	3.4631e-34	0.58659	4.05078e-138	WTu	KOu	WTu-KOu
9930021J03Rik	EVT	0.615108	5.86476e-279	0.659241	1.40752e-95	WTu	KOu	WTu-KOu
9930021J03Rik	STB	0.700414	0	0.549231	5.30773e-256	WTu	KOu	WTu-KOu
9930021J03Rik	CTB	-0.750083	0	-0.722157	0	WTd	KOd	WTd-KOd
A230057D06Rik	Vascular	1.81117	0	1.32125	0	WTu	KOu	WTu-KOu
A330023F24Rik	CTB	-0.599064	0	-0.672814	0	WTd	KOd	WTd-KOd
A330023F24Rik	EVT	0.398566	5.70394e-159	1.20677	0	WTu	KOu	WTu-KOu
A330023F24Rik	STB	0.452758	1.31466e-235	0.43923	9.96222e-159	WTu	KOu	WTu-KOu
A330023F24Rik	Vascular	1.15247	8.46515e-227	0.864154	6.33978e-226	WTu	KOu	WTu-KOu
A330076H08Rik	Vascular	1.03413	0	0.748648	0	WTu	KOu	WTu-KOu
A4galt	CTB	-0.884538	0	-0.7941	0	WTd	KOd	WTd-KOd
A930015D03Rik	CTB	-0.306548	0	-0.364099	0	WTd	KOd	WTd-KOd
A930015D03Rik	EVT	0.361705	1.96563e-193	0.765904	7.33448e-192	WTu	KOu	WTu-KOu
A930037H05Rik	Vascular	0.592599	1.31768e-155	0.703504	0	WTu	KOu	WTu-KOu
AA467197	STB	-0.324352	3.36385e-08	-0.266809	3.09042e-13	WTd	KOd	WTd-KOd
AA467197	CTB	0.330561	2.23718e-16	0.447255	0.0297051	WTu	KOu	WTu-KOu
Aak1	CTB	-0.862833	0	-0.840285	0	WTd	KOd	WTd-KOd
Aak1	Vascular	0.805923	1.16213e-62	0.62416	2.41935e-92	WTu	KOu	WTu-KOu
Aak1	STB	0.880209	0	0.379163	5.93527e-196	WTu	KOu	WTu-KOu
Aak1	Stromal	0.495814	5.97972e-36	0.83402	1.74535e-237	WTu	KOu	WTu-KOu
Aak1	EVT	0.662006	5.40998e-230	1.36475	1.59901e-198	WTu	KOu	WTu-KOu
Aamp	CTB	0.362397	4.67247e-31	0.405097	4.32324e-16	WTu	KOu	WTu-KOu
Aatf	Stromal	0.275247	1.27706e-17	0.391944	1.14992e-88	WTu	KOu	WTu-KOu
Aatf	STB	0.480441	9.33253e-247	0.649804	0	WTu	KOu	WTu-KOu
Aatf	EVT	0.529334	0	0.552317	3.29155e-143	WTu	KOu	WTu-KOu
Aatf	CTB	-0.490395	0	-0.514072	0	WTd	KOd	WTd-KOd
Abca1	Vascular	0.833928	3.84393e-69	0.8402	3.50331e-116	WTu	KOu	WTu-KOu
Abca1	CTB	-0.403745	1.55678e-245	-0.449892	1.48782e-227	WTd	KOd	WTd-KOd
Abca1	Stromal	0.882994	3.53401e-40	0.604917	4.54386e-79	WTu	KOu	WTu-KOu
Abca1	STB	0.2679	1.25278e-98	-0.312271	1.30977e-08	WTu	KOd	WTu-KOd
Abca3	Vascular	0.540385	1.3498e-31	0.280174	1.57793e-30	WTu	KOu	WTu-KOu
Abcb7	Vascular	0.598376	1.63926e-50	0.513363	3.59537e-100	WTu	KOu	WTu-KOu
Abcb7	CTB	-0.353797	0	-0.355592	0	WTd	KOd	WTd-KOd
Abcb7	Stromal	0.464487	1.17736e-48	0.359623	1.0068e-79	WTu	KOu	WTu-KOu
Abcc1	EVT	0.379708	7.90151e-133	1.17763	0	WTu	KOu	WTu-KOu
Abcc4	Vascular	0.372956	2.11151e-40	0.422995	6.20197e-78	WTu	KOu	WTu-KOu
Abcc4	CTB	-0.365783	1.59344e-278	-0.417872	0	WTd	KOd	WTd-KOd
Abcc5	STB	1.83865	0	-0.267164	1.73778e-08	WTu	KOd	WTu-KOd
Abcc5	Stromal	0.457214	1.7453e-43	2.03181	0	WTu	KOu	WTu-KOu
Abcc5	Vascular	0.685599	8.98266e-79	0.587802	7.02958e-130	WTu	KOu	WTu-KOu
Abcc5	CTB	-1.11903	0	-1.23059	0	WTd	KOd	WTd-KOd
Abcd4	EVT	0.461637	1.90533e-218	0.814927	8.72942e-219	WTu	KOu	WTu-KOu
Abcg1	Vascular	0.60378	4.76228e-46	0.329027	4.48501e-46	WTu	KOu	WTu-KOu
Abcg2	CTB	-0.335871	1.5003e-230	-0.273077	1.55292e-185	WTd	KOd	WTd-KOd
Abcg2	Vascular	0.986535	3.28772e-145	0.884043	2.11042e-244	WTu	KOu	WTu-KOu
Abhd12	Stromal	0.437189	1.72737e-15	0.665366	2.39747e-138	WTu	KOu	WTu-KOu
Abhd12	CTB	-0.277287	9.79317e-248	-0.316925	8.36373e-240	WTd	KOd	WTd-KOd
Abhd17b	Stromal	0.534353	2.53908e-45	0.361025	6.70615e-75	WTu	KOu	WTu-KOu
Abhd17b	Vascular	0.347234	1.67749e-20	0.469549	1.01459e-69	WTu	KOu	WTu-KOu
Abhd17b	CTB	-0.330429	0	-0.374805	0	WTd	KOd	WTd-KOd
Abhd18	CTB	-0.315053	0	-0.321943	0	WTd	KOd	WTd-KOd
Abhd18	EVT	0.333539	1.30035e-201	0.375153	1.8009e-88	WTu	KOu	WTu-KOu
Abhd18	STB	0.370195	8.37868e-160	0.342299	5.24591e-200	WTu	KOu	WTu-KOu
Abhd6	EVT	0.404668	4.50466e-134	0.434625	4.20761e-50	WTu	KOu	WTu-KOu
Abi1	Stromal	0.778382	2.51134e-64	0.898259	1.33919e-240	WTu	KOu	WTu-KOu
Abi1	STB	0.821704	0	0.655959	1.52958e-266	WTu	KOu	WTu-KOu
Abi1	Vascular	0.742696	8.38848e-72	0.810345	1.22473e-133	WTu	KOu	WTu-KOu
Abi1	EVT	0.605959	2.71358e-267	0.702037	1.54859e-90	WTu	KOu	WTu-KOu
Abi1	CTB	-0.852871	0	-0.907206	0	WTd	KOd	WTd-KOd
Abi2	EVT	0.274634	6.5607e-109	0.59605	3.19977e-136	WTu	KOu	WTu-KOu
Abi2	Vascular	0.519455	7.52014e-45	0.641975	5.97847e-128	WTu	KOu	WTu-KOu
Abi2	CTB	-0.305199	1.94996e-295	-0.329063	0	WTd	KOd	WTd-KOd
Abi3	Vascular	0.890095	0	0.551687	3.29616e-258	WTu	KOu	WTu-KOu
Abl1	Vascular	0.588196	1.62336e-35	0.644645	1.3337e-102	WTu	KOu	WTu-KOu
Abl1	EVT	0.538787	5.44597e-255	0.579303	5.20247e-81	WTu	KOu	WTu-KOu
Abl1	Stromal	0.548634	6.22143e-48	0.630592	3.03852e-147	WTu	KOu	WTu-KOu
Abl1	CTB	-0.633594	0	-0.665449	0	WTd	KOd	WTd-KOd
Abl1	STB	0.542682	3.71392e-214	0.477218	1.32062e-215	WTu	KOu	WTu-KOu
Abl2	Stromal	0.468098	2.76027e-32	0.534101	2.53833e-125	WTu	KOu	WTu-KOu
Abl2	CTB	-0.729488	0	-0.641223	0	WTd	KOd	WTd-KOd
Abl2	EVT	0.747065	0	0.451265	1.0467e-74	WTu	KOu	WTu-KOu
Abl2	STB	0.619425	2.9133e-257	0.733309	0	WTu	KOu	WTu-KOu
Abl2	Vascular	0.499508	5.79447e-32	0.411876	3.28536e-49	WTu	KOu	WTu-KOu
Ablim1	Vascular	2.45118	0	2.11732	0	WTu	KOu	WTu-KOu
Ablim1	CTB	-1.0788	0	-1.12492	0	WTd	KOd	WTd-KOd
Ablim1	Stromal	0.801593	1.41553e-68	0.66827	4.95502e-119	WTu	KOu	WTu-KOu
Abr	Stromal	0.927163	3.12436e-55	1.72967	0	WTu	KOu	WTu-KOu
Abr	CTB	-0.926441	0	-0.98818	0	WTd	KOd	WTd-KOd
Acaca	CTB	-0.45401	0	-0.457519	0	WTd	KOd	WTd-KOd
Acaca	Stromal	0.364874	9.32229e-32	0.614232	1.45105e-201	WTu	KOu	WTu-KOu
Acadm	CTB	0.316938	5.85421e-55	0.264054	3.10412e-39	WTu	KOu	WTu-KOu
Acap2	Stromal	0.940634	1.59043e-101	0.592687	1.94514e-109	WTu	KOu	WTu-KOu
Acap2	Vascular	1.25905	6.0054e-137	1.04655	3.51724e-218	WTu	KOu	WTu-KOu
Acap2	EVT	0.535525	1.18301e-233	0.381427	4.99118e-56	WTu	KOu	WTu-KOu
Acap2	STB	0.472035	8.70027e-183	0.480053	2.71112e-229	WTu	KOu	WTu-KOu
Acap2	CTB	-0.818185	0	-0.756694	0	WTd	KOd	WTd-KOd
Acbd3	STB	0.293102	1.165e-134	0.420888	2.73269e-196	WTu	KOu	WTu-KOu
Acbd5	CTB	-0.304318	0	-0.30054	0	WTd	KOd	WTd-KOd
Acbd6	Vascular	0.344831	1.64474e-21	0.342179	2.61169e-45	WTu	KOu	WTu-KOu
Acbd6	STB	0.272083	2.94783e-116	0.316352	2.46154e-175	WTu	KOu	WTu-KOu
Acbd6	CTB	-0.307821	0	-0.264725	2.37462e-258	WTd	KOd	WTd-KOd
Ace	Vascular	0.602296	5.45397e-114	0.356241	2.66897e-101	WTu	KOu	WTu-KOu
Acer2	CTB	-0.665577	9.61427e-257	-0.651041	3.03138e-216	WTd	KOd	WTd-KOd
Acer2	Vascular	2.30453	0	1.79082	0	WTu	KOu	WTu-KOu
Acer3	Stromal	0.688783	2.43736e-41	0.954218	1.41017e-295	WTu	KOu	WTu-KOu
Acer3	Vascular	0.388846	3.58028e-23	0.254037	9.68311e-26	WTu	KOu	WTu-KOu
Acer3	CTB	-0.46867	0	-0.525413	0	WTd	KOd	WTd-KOd
Acin1	Vascular	0.52421	5.14384e-34	0.510725	6.08785e-65	WTu	KOu	WTu-KOu
Acin1	EVT	0.643613	2.10131e-273	0.412792	7.55859e-49	WTu	KOu	WTu-KOu
Acin1	CTB	-0.733705	0	-0.748885	0	WTd	KOd	WTd-KOd
Acin1	STB	0.737592	0	0.912846	0	WTu	KOu	WTu-KOu
Acin1	Stromal	0.437614	2.36646e-27	0.566864	5.30782e-127	WTu	KOu	WTu-KOu
Aco1	EVT	0.304936	2.1497e-77	1.10296	1.66759e-168	WTu	KOu	WTu-KOu
Acss1	CTB	-0.448399	5.40162e-203	-0.374875	1.39814e-141	WTd	KOd	WTd-KOd
Actb	Stromal	-0.545928	1.62394e-25	-0.839041	3.18245e-161	WTd	KOd	WTd-KOd
Actb	Vascular	-0.805726	9.92069e-45	-0.688872	2.33893e-71	WTd	KOd	WTd-KOd
Actb	EVT	-0.777335	5.09182e-135	-0.933085	8.53009e-51	WTd	KOd	WTd-KOd
Actb	STB	-1.04516	3.96712e-192	-0.944814	1.13409e-167	WTd	KOd	WTd-KOd
Actb	CTB	0.909048	0	0.9122	0	WTu	KOu	WTu-KOu
Actg1	CTB	0.582913	5.98169e-34	0.6801	6.64084e-138	WTu	KOu	WTu-KOu
Actg1	STB	-0.662754	4.12805e-13	-0.512986	1.95253e-25	WTd	KOd	WTd-KOd
Actg1	Stromal	-0.519779	0.0119831	-0.67347	1.91351e-48	WTd	KOd	WTd-KOd
Actg1	Vascular	-0.775943	3.47365e-10	-0.6256	4.6463e-26	WTd	KOd	WTd-KOd
Actn1	CTB	-0.555568	0	-0.491508	1.19404e-254	WTd	KOd	WTd-KOd
Actn4	Vascular	0.777868	3.57108e-57	0.431362	1.39772e-48	WTu	KOu	WTu-KOu
Actr3	Stromal	0.365972	6.5284e-19	0.381934	3.18093e-59	WTu	KOu	WTu-KOu
Actr3	CTB	-0.378219	0	-0.397339	2.55225e-261	WTd	KOd	WTd-KOd
Actr3	EVT	0.563359	3.0943e-188	0.632634	4.27743e-49	WTu	KOu	WTu-KOu
Acvr1	CTB	-0.44098	0	-0.459769	0	WTd	KOd	WTd-KOd
Acvr1	Stromal	0.480952	1.95563e-39	0.451075	1.0524e-69	WTu	KOu	WTu-KOu
Acvr1	Vascular	0.497316	9.51543e-34	0.42168	7.44073e-60	WTu	KOu	WTu-KOu
Acvr1	STB	0.401449	6.43941e-165	0.481195	2.21087e-271	WTu	KOu	WTu-KOu
Acvr2a	CTB	-0.386399	0	-0.329246	0	WTd	KOd	WTd-KOd
Acvr2a	Vascular	0.614556	2.04981e-57	0.571771	3.03549e-99	WTu	KOu	WTu-KOu
Acvr2b	EVT	0.515164	1.2319e-193	1.34428	1.93599e-208	WTu	KOu	WTu-KOu
Acvrl1	Vascular	1.17267	3.63132e-147	0.774517	4.21662e-150	WTu	KOu	WTu-KOu
Acyp2	Vascular	0.826862	1.76981e-109	0.776383	8.83083e-274	WTu	KOu	WTu-KOu
Acyp2	CTB	-0.49311	0	-0.413893	0	WTd	KOd	WTd-KOd
Acyp2	Stromal	0.639905	2.01586e-107	0.44412	2.96445e-182	WTu	KOu	WTu-KOu
Adam12	Stromal	2.10957	1.5157e-235	0.727556	2.9335e-80	WTu	KOu	WTu-KOu
Adam12	Vascular	0.84439	1.73792e-67	1.66588	0	WTu	KOu	WTu-KOu
Adam12	CTB	-1.06045	0	-0.937766	0	WTd	KOd	WTd-KOd
Adam19	STB	1.39152	2.5487e-258	0.634832	1.24738e-72	WTu	KOu	WTu-KOu
Adam19	EVT	0.882884	7.38182e-160	0.929611	1.33106e-67	WTu	KOu	WTu-KOu
Adam19	CTB	-0.992185	0	-0.934981	6.62902e-280	WTd	KOd	WTd-KOd
Adam23	CTB	-1.08752	6.84154e-282	-1.087	9.51678e-269	WTd	KOd	WTd-KOd
Adam23	Vascular	3.2698	0	2.60007	0	WTu	KOu	WTu-KOu
Adamts10	Vascular	0.573159	3.5566e-159	0.632789	3.32471e-271	WTu	KOu	WTu-KOu
Adamts2	CTB	-0.56023	6.83138e-174	-0.349435	3.8562e-87	WTd	KOd	WTd-KOd
Adamts6	Vascular	0.611007	2.44548e-122	1.07778	0	WTu	KOu	WTu-KOu
Adamts6	Stromal	0.901384	2.89556e-158	0.57949	2.48268e-125	WTu	KOu	WTu-KOu
Adamts9	CTB	-1.36605	0	-1.31594	0	WTd	KOd	WTd-KOd
Adamts9	STB	1.66238	6.206e-123	-0.380146	0.00672658	WTu	KOd	WTu-KOd
Adamts9	Stromal	0.845366	2.29448e-77	1.57923	1.578e-96	WTu	KOu	WTu-KOu
Adamts9	Vascular	2.16111	0	1.84031	0	WTu	KOu	WTu-KOu
Adap1	EVT	0.384937	2.11858e-188	0.272778	1.29873e-62	WTu	KOu	WTu-KOu
Adar	Stromal	0.427693	1.49461e-42	0.269045	9.8254e-48	WTu	KOu	WTu-KOu
Adar	CTB	-0.27372	1.18558e-258	-0.281341	1.65556e-247	WTd	KOd	WTd-KOd
Adar	Vascular	0.396108	1.3863e-34	0.437928	8.85964e-72	WTu	KOu	WTu-KOu
Adarb1	STB	0.387144	7.29625e-204	0.426739	1.78456e-174	WTu	KOu	WTu-KOu
Adarb1	Vascular	0.595695	4.61075e-48	0.660691	8.68769e-118	WTu	KOu	WTu-KOu
Adarb1	CTB	-0.310722	3.86448e-226	-0.411197	0	WTd	KOd	WTd-KOd
Adcy4	Vascular	0.6821	6.39216e-192	0.457116	3.14678e-238	WTu	KOu	WTu-KOu
Adcy7	CTB	-0.364177	8.40394e-202	-0.316817	1.25712e-155	WTd	KOd	WTd-KOd
Adcy9	Vascular	2.67224	0	2.03347	0	WTu	KOu	WTu-KOu
Adcy9	Stromal	0.723892	5.52955e-78	0.381365	1.39381e-53	WTu	KOu	WTu-KOu
Adcy9	CTB	-1.07106	0	-1.04376	0	WTd	KOd	WTd-KOd
Add1	Vascular	0.418644	1.36944e-21	0.356955	1.77504e-49	WTu	KOu	WTu-KOu
Add1	Stromal	0.273509	7.68477e-21	0.449808	1.09704e-100	WTu	KOu	WTu-KOu
Add1	STB	0.446825	1.52523e-180	0.426423	7.95254e-209	WTu	KOu	WTu-KOu
Add1	CTB	-0.417817	0	-0.442025	0	WTd	KOd	WTd-KOd
Add3	Stromal	0.767861	3.04095e-51	1.45973	6.4386e-285	WTu	KOu	WTu-KOu
Add3	Vascular	0.731153	4.60486e-54	0.782538	6.31637e-133	WTu	KOu	WTu-KOu
Add3	CTB	-0.802207	0	-0.836894	0	WTd	KOd	WTd-KOd
Adgra2	Vascular	0.520796	5.92266e-77	0.660703	5.99059e-261	WTu	KOu	WTu-KOu
Adgra3	STB	0.400893	1.37041e-90	0.476813	2.91335e-111	WTu	KOu	WTu-KOu
Adgre5	Vascular	1.32414	0	0.807006	0	WTu	KOu	WTu-KOu
Adgrf5	Vascular	1.32203	5.17231e-118	0.877546	3.79403e-84	WTu	KOu	WTu-KOu
Adgrg1	EVT	-0.378771	0.000913962	0.526974	2.00908e-65	WTd	KOd	WTd-KOd
Adgrg1	STB	-0.459484	0.0187069	-0.37524	0.000663962	WTd	KOd	WTd-KOd
Adgrg1	CTB	0.44928	2.03828e-06	0.330653	2.59956e-09	WTu	KOu	WTu-KOu
Adgrg6	CTB	-0.45647	6.11615e-152	-0.446724	2.31451e-126	WTd	KOd	WTd-KOd
Adgrl2	Vascular	1.26404	1.24503e-144	1.28446	4.62185e-223	WTu	KOu	WTu-KOu
Adgrl2	CTB	-0.649095	3.7731e-282	-0.718513	1.9595e-266	WTd	KOd	WTd-KOd
Adgrl2	STB	0.645036	6.414e-85	0.766091	4.86106e-87	WTu	KOu	WTu-KOu
Adgrl4	CTB	-0.817235	2.50976e-187	-0.9203	4.88915e-221	WTd	KOd	WTd-KOd
Adgrl4	Vascular	2.82062	0	2.36702	0	WTu	KOu	WTu-KOu
Adipor1	STB	-0.283371	4.43009e-17	-0.311242	3.80814e-22	WTd	KOd	WTd-KOd
Adipor2	CTB	-0.336232	7.68633e-251	-0.29038	8.78684e-215	WTd	KOd	WTd-KOd
Adk	EVT	0.296171	7.0783e-83	1.22546	7.7158e-237	WTu	KOu	WTu-KOu
Adk	Vascular	1.13695	2.49669e-128	1.16474	4.40234e-254	WTu	KOu	WTu-KOu
Adk	CTB	-0.803232	0	-0.876096	0	WTd	KOd	WTd-KOd
Adk	Stromal	0.842565	1.75946e-85	0.910075	7.87235e-219	WTu	KOu	WTu-KOu
Adra2b	CTB	0.377019	0.000100776	0.302505	7.56705e-12	WTu	KOu	WTu-KOu
Adrb1	Vascular	1.75283	0	1.07232	0	WTu	KOu	WTu-KOu
Aebp1	CTB	0.273719	3.39735e-15	0.274998	7.17197e-10	WTu	KOu	WTu-KOu
Aebp2	CTB	-0.475747	0	-0.476946	0	WTd	KOd	WTd-KOd
Aebp2	STB	0.471149	5.91109e-163	0.816556	9.83328e-283	WTu	KOu	WTu-KOu
Aebp2	EVT	0.708975	1.6997e-280	0.68631	1.51233e-83	WTu	KOu	WTu-KOu
Afap1	CTB	-0.65079	0	-0.641437	0	WTd	KOd	WTd-KOd
Afap1	EVT	0.828527	6.39e-285	0.642973	5.01963e-61	WTu	KOu	WTu-KOu
Afap1	STB	0.752783	5.3267e-253	0.859702	7.62533e-276	WTu	KOu	WTu-KOu
Afap1l1	CTB	-0.554397	0	-0.539544	0	WTd	KOd	WTd-KOd
Afap1l1	Vascular	0.828864	1.36129e-98	0.550687	1.36119e-73	WTu	KOu	WTu-KOu
Afap1l1	EVT	0.961525	0	0.770921	1.7314e-119	WTu	KOu	WTu-KOu
Afap1l2	EVT	1.32286	0	1.28919	1.39666e-140	WTu	KOu	WTu-KOu
Afap1l2	CTB	-0.766839	0	-0.839234	0	WTd	KOd	WTd-KOd
Afap1l2	STB	0.28442	4.01764e-61	1.63229	0	WTu	KOu	WTu-KOu
Afdn	CTB	-0.920284	0	-0.954517	0	WTd	KOd	WTd-KOd
Afdn	Stromal	0.262635	3.24037e-16	0.794853	1.35168e-135	WTu	KOu	WTu-KOu
Afdn	Vascular	1.35804	1.91563e-150	1.08433	1.19937e-161	WTu	KOu	WTu-KOu
Afdn	STB	1.1916	0	0.594078	7.13728e-136	WTu	KOu	WTu-KOu
Aff1	CTB	-0.836189	0	-0.788311	0	WTd	KOd	WTd-KOd
Aff1	Vascular	0.434241	9.00415e-29	0.514827	1.55958e-81	WTu	KOu	WTu-KOu
Aff1	Stromal	0.92074	6.1299e-89	1.38094	0	WTu	KOu	WTu-KOu
Aff2	CTB	-1.28017	0	-1.36203	0	WTd	KOd	WTd-KOd
Aff2	Stromal	2.79771	0	1.04151	0	WTu	KOu	WTu-KOu
Aff3	CTB	-0.888738	0	-0.823504	0	WTd	KOd	WTd-KOd
Aff4	STB	0.41926	1.33931e-137	0.853697	1.33895e-214	WTu	KOu	WTu-KOu
Aff4	CTB	-0.588662	0	-0.510135	0	WTd	KOd	WTd-KOd
Afg1l	EVT	0.422659	7.78659e-224	0.524705	5.88592e-99	WTu	KOu	WTu-KOu
Afg1l	CTB	-0.560819	0	-0.575052	0	WTd	KOd	WTd-KOd
Afg1l	Vascular	0.714352	3.85693e-60	0.686896	5.2059e-171	WTu	KOu	WTu-KOu
Afg1l	STB	0.537327	1.33322e-288	0.379649	5.72439e-230	WTu	KOu	WTu-KOu
Afg1l	Stromal	0.290747	2.20499e-16	0.478639	8.80392e-129	WTu	KOu	WTu-KOu
Afg3l2	CTB	-0.26172	7.98904e-261	-0.255821	1.1308e-263	WTd	KOd	WTd-KOd
Aftph	CTB	-0.358162	0	-0.422453	0	WTd	KOd	WTd-KOd
Aftph	Stromal	0.475262	3.60807e-35	0.44943	3.30356e-106	WTu	KOu	WTu-KOu
Aftph	Vascular	0.421929	1.8059e-27	0.454764	1.40589e-62	WTu	KOu	WTu-KOu
Agap1	Vascular	1.68672	8.68999e-243	1.69314	0	WTu	KOu	WTu-KOu
Agap1	STB	1.09591	0	0.49877	4.61556e-179	WTu	KOu	WTu-KOu
Agap1	CTB	-1.25625	0	-1.28492	0	WTd	KOd	WTd-KOd
Agap1	EVT	0.541296	1.11144e-168	1.03816	3.57536e-143	WTu	KOu	WTu-KOu
Agap1	Stromal	1.23411	1.0077e-107	1.05266	6.54608e-263	WTu	KOu	WTu-KOu
Agap3	EVT	0.557014	1.16984e-285	0.364709	1.17573e-63	WTu	KOu	WTu-KOu
Agap3	CTB	-0.341209	0	-0.279528	3.40022e-299	WTd	KOd	WTd-KOd
Agfg1	Vascular	0.393911	6.51643e-23	0.252335	1.58495e-38	WTu	KOu	WTu-KOu
Agfg1	STB	0.251989	4.2718e-115	0.376994	5.42924e-158	WTu	KOu	WTu-KOu
Agfg1	EVT	1.09017	1.84572e-282	2.06085	2.10969e-210	WTu	KOu	WTu-KOu
Agfg1	CTB	-0.690179	0	-0.685446	0	WTd	KOd	WTd-KOd
Agmo	Vascular	1.57104	0	1.38187	0	WTu	KOu	WTu-KOu
Ago3	Stromal	0.573088	2.22099e-51	0.510332	3.41987e-138	WTu	KOu	WTu-KOu
Ago3	Vascular	0.531068	1.06686e-26	0.461763	4.82119e-60	WTu	KOu	WTu-KOu
Ago3	STB	0.51485	1.56175e-241	0.515886	5.41779e-277	WTu	KOu	WTu-KOu
Ago3	CTB	-0.647992	0	-0.577155	0	WTd	KOd	WTd-KOd
Ago3	EVT	0.610087	1.85663e-287	0.576123	8.67297e-112	WTu	KOu	WTu-KOu
Agpat4	Vascular	0.343225	2.81985e-21	0.254474	1.09741e-29	WTu	KOu	WTu-KOu
Agps	EVT	0.633273	3.14511e-248	0.86138	1.99081e-110	WTu	KOu	WTu-KOu
Agps	CTB	-0.48225	0	-0.559129	0	WTd	KOd	WTd-KOd
Agps	STB	0.349847	8.64932e-135	0.633195	1.3115e-256	WTu	KOu	WTu-KOu
Agrn	Vascular	0.474819	2.4884e-35	0.439329	1.15581e-71	WTu	KOu	WTu-KOu
Agtpbp1	CTB	-0.54287	0	-0.538518	0	WTd	KOd	WTd-KOd
Agtpbp1	Vascular	0.471273	1.05626e-28	0.626008	1.21657e-128	WTu	KOu	WTu-KOu
Agtpbp1	STB	0.46283	2.57022e-194	0.306398	1.47538e-165	WTu	KOu	WTu-KOu
Agtpbp1	Stromal	0.860247	1.12056e-122	0.511816	4.611e-128	WTu	KOu	WTu-KOu
Agtpbp1	EVT	0.279853	1.09273e-159	0.457748	5.56684e-101	WTu	KOu	WTu-KOu
Ahctf1	CTB	-0.43349	0	-0.441234	0	WTd	KOd	WTd-KOd
Ahctf1	EVT	0.530183	6.23681e-259	0.451545	7.72531e-66	WTu	KOu	WTu-KOu
Ahctf1	STB	0.36346	2.31923e-150	0.651632	0	WTu	KOu	WTu-KOu
Ahcyl1	STB	0.266898	1.25041e-127	0.311997	1.12577e-175	WTu	KOu	WTu-KOu
Ahcyl2	STB	0.360035	2.19798e-149	0.469978	7.76748e-158	WTu	KOu	WTu-KOu
Ahcyl2	CTB	-0.866003	0	-1.0064	0	WTd	KOd	WTd-KOd
Ahcyl2	EVT	1.46052	2.45464e-227	2.93551	0	WTu	KOu	WTu-KOu
Ahdc1	CTB	-0.551351	0	-0.503643	0	WTd	KOd	WTd-KOd
Ahdc1	STB	0.404913	1.0271e-143	0.933279	0	WTu	KOu	WTu-KOu
Ahnak	CTB	-0.416803	1.2511e-202	-0.45196	2.63108e-153	WTd	KOd	WTd-KOd
Ahnak	EVT	0.961168	5.55748e-227	1.05838	4.59939e-60	WTu	KOu	WTu-KOu
Ahr	Vascular	1.00847	0	0.665689	0	WTu	KOu	WTu-KOu
AI480526	EVT	0.388354	0	0.403083	1.79797e-153	WTu	KOu	WTu-KOu
AI480526	CTB	-0.31691	0	-0.286514	0	WTd	KOd	WTd-KOd
Aif1l	CTB	0.290114	2.52268e-36	0.453384	1.32457e-05	WTu	KOu	WTu-KOu
Aig1	STB	0.573536	1.67373e-262	0.320777	3.72693e-165	WTu	KOu	WTu-KOu
Aig1	Vascular	0.291401	3.08539e-14	0.408527	4.5424e-22	WTu	KOu	WTu-KOu
Aig1	CTB	-0.561077	0	-0.498383	0	WTd	KOd	WTd-KOd
Aig1	EVT	0.263136	1.71762e-114	0.56405	2.39493e-84	WTu	KOu	WTu-KOu
Aig1	Stromal	0.877568	2.75268e-29	0.519487	3.22988e-99	WTu	KOu	WTu-KOu
Airn	CTB	-2.7045	0	-2.72285	0	WTd	KOd	WTd-KOd
Airn	Stromal	2.58079	5.54462e-223	1.18459	0	WTu	KOu	WTu-KOu
Airn	Vascular	4.01849	0	3.93461	0	WTu	KOu	WTu-KOu
Akap10	CTB	-0.766042	0	-0.788777	0	WTd	KOd	WTd-KOd
Akap10	STB	0.574187	2.31637e-280	0.752405	0	WTu	KOu	WTu-KOu
Akap10	EVT	0.687267	0	0.501805	2.46074e-93	WTu	KOu	WTu-KOu
Akap10	Vascular	0.753186	2.35117e-52	0.651786	1.42547e-113	WTu	KOu	WTu-KOu
Akap10	Stromal	0.693816	5.77619e-66	0.705169	2.2907e-186	WTu	KOu	WTu-KOu
Akap11	CTB	-0.297534	0	-0.307807	3.92487e-298	WTd	KOd	WTd-KOd
Akap11	Vascular	0.279007	1.06365e-23	0.525459	5.70956e-74	WTu	KOu	WTu-KOu
Akap12	Vascular	0.561982	1.95409e-75	0.739904	1.40976e-201	WTu	KOu	WTu-KOu
Akap13	CTB	-1.32281	0	-1.45969	0	WTd	KOd	WTd-KOd
Akap13	STB	0.965708	0	0.515927	1.92184e-173	WTu	KOu	WTu-KOu
Akap13	EVT	1.46581	8.68331e-299	2.84215	1.84702e-242	WTu	KOu	WTu-KOu
Akap13	Vascular	0.631802	1.36818e-43	0.805426	1.38106e-121	WTu	KOu	WTu-KOu
Akap13	Stromal	0.837084	6.4168e-56	1.11024	2.99444e-239	WTu	KOu	WTu-KOu
Akap7	CTB	-0.42607	0	-0.375525	0	WTd	KOd	WTd-KOd
Akap7	STB	0.27851	2.60924e-148	0.576214	0	WTu	KOu	WTu-KOu
Akap8	STB	0.330381	2.8895e-158	0.280745	1.03524e-173	WTu	KOu	WTu-KOu
Akap8	CTB	-0.292865	0	-0.317737	0	WTd	KOd	WTd-KOd
Akap8	Stromal	0.316918	1.15179e-19	0.313526	2.33434e-67	WTu	KOu	WTu-KOu
Akap8l	CTB	-0.442479	0	-0.421776	0	WTd	KOd	WTd-KOd
Akap8l	Vascular	0.251262	1.8092e-10	0.358152	5.63389e-45	WTu	KOu	WTu-KOu
Akap8l	STB	0.489678	5.16571e-263	0.254591	1.58442e-150	WTu	KOu	WTu-KOu
Akap8l	Stromal	0.37116	5.2147e-27	0.524307	5.29974e-169	WTu	KOu	WTu-KOu
Akap9	CTB	-0.631558	0	-0.647177	0	WTd	KOd	WTd-KOd
Akap9	Stromal	0.363512	2.56044e-22	0.619413	3.34387e-149	WTu	KOu	WTu-KOu
Akap9	EVT	0.55344	6.18927e-252	0.55982	6.20592e-76	WTu	KOu	WTu-KOu
Akap9	STB	0.703459	3.58505e-279	0.651313	6.79538e-282	WTu	KOu	WTu-KOu
Akap9	Vascular	0.276703	5.85827e-16	0.367493	3.73833e-48	WTu	KOu	WTu-KOu
Akt1	CTB	0.366039	2.77782e-39	0.342034	1.49653e-27	WTu	KOu	WTu-KOu
Akt3	STB	0.91136	0	0.599643	2.27138e-252	WTu	KOu	WTu-KOu
Akt3	Stromal	1.3135	5.2108e-183	0.86951	1.83018e-244	WTu	KOu	WTu-KOu
Akt3	Vascular	1.19766	9.17635e-150	1.45027	0	WTu	KOu	WTu-KOu
Akt3	CTB	-1.02975	0	-1.02729	0	WTd	KOd	WTd-KOd
Alcam	Stromal	1.29669	3.44751e-206	1.09958	2.13381e-151	WTu	KOu	WTu-KOu
Alkbh1	STB	0.354241	4.79809e-184	0.440241	0	WTu	KOu	WTu-KOu
Alkbh1	CTB	-0.391672	0	-0.405559	0	WTd	KOd	WTd-KOd
Alkbh1	Stromal	0.301424	2.50585e-23	0.343232	1.91549e-93	WTu	KOu	WTu-KOu
Alms1	CTB	-0.252072	0	-0.25901	6.27026e-300	WTd	KOd	WTd-KOd
Als2	EVT	0.60104	0	0.649398	7.47814e-176	WTu	KOu	WTu-KOu
Als2	CTB	-0.419878	0	-0.475143	0	WTd	KOd	WTd-KOd
Als2	STB	0.304818	1.85621e-125	0.717729	0	WTu	KOu	WTu-KOu
Ambra1	Vascular	0.785536	3.10787e-67	0.980007	2.29212e-184	WTu	KOu	WTu-KOu
Ambra1	CTB	-1.28419	0	-1.30207	0	WTd	KOd	WTd-KOd
Ambra1	STB	1.0172	0	1.3005	0	WTu	KOu	WTu-KOu
Ambra1	EVT	1.26652	0	1.11783	1.69705e-163	WTu	KOu	WTu-KOu
Ambra1	Stromal	0.963196	1.88699e-102	0.998171	7.84311e-285	WTu	KOu	WTu-KOu
Ammecr1	STB	0.752011	2.48551e-241	0.799625	0	WTu	KOu	WTu-KOu
Ammecr1	CTB	-0.511778	0	-0.414101	1.2882e-301	WTd	KOd	WTd-KOd
Ammecr1l	CTB	-0.403294	0	-0.40391	0	WTd	KOd	WTd-KOd
Ammecr1l	STB	0.549907	2.03592e-276	0.25333	1.22892e-157	WTu	KOu	WTu-KOu
Ammecr1l	EVT	0.293264	8.58038e-113	0.623143	1.76736e-119	WTu	KOu	WTu-KOu
Amn1	STB	0.590014	0	0.410681	1.24166e-255	WTu	KOu	WTu-KOu
Amn1	CTB	-0.520902	0	-0.52706	0	WTd	KOd	WTd-KOd
Amn1	EVT	0.407924	6.9098e-216	0.654483	1.56914e-150	WTu	KOu	WTu-KOu
Amn1	Stromal	0.433215	2.90863e-26	0.504368	1.68297e-157	WTu	KOu	WTu-KOu
Amot	EVT	0.448897	1.00019e-46	2.02548	4.55536e-161	WTu	KOu	WTu-KOu
Amotl1	Vascular	0.538278	1.39275e-33	0.439107	7.91692e-71	WTu	KOu	WTu-KOu
Ampd3	CTB	-0.760724	3.12897e-211	-0.735956	7.84864e-174	WTd	KOd	WTd-KOd
Anapc1	EVT	0.681018	1.72963e-299	0.982004	1.45796e-147	WTu	KOu	WTu-KOu
Anapc1	Vascular	0.359275	2.90508e-21	0.474739	2.76287e-69	WTu	KOu	WTu-KOu
Anapc1	CTB	-0.524641	0	-0.524498	0	WTd	KOd	WTd-KOd
Anapc1	STB	0.316034	4.80441e-131	0.492479	3.75975e-220	WTu	KOu	WTu-KOu
Anapc10	CTB	-0.29063	0	-0.293745	0	WTd	KOd	WTd-KOd
Anapc10	EVT	0.360241	2.12661e-175	0.771147	6.59264e-161	WTu	KOu	WTu-KOu
Anapc4	EVT	0.335874	4.57919e-177	0.596923	3.25581e-96	WTu	KOu	WTu-KOu
Anapc4	CTB	-0.272456	0	-0.251638	2.32225e-285	WTd	KOd	WTd-KOd
Anapc5	Vascular	0.314975	1.49855e-18	0.279133	3.22441e-45	WTu	KOu	WTu-KOu
Ank	EVT	0.527166	2.17624e-160	1.61337	1.88024e-250	WTu	KOu	WTu-KOu
Ank	CTB	-0.517564	0	-0.562511	2.41698e-302	WTd	KOd	WTd-KOd
Ank	Stromal	0.311061	3.40969e-14	0.701517	3.96985e-101	WTu	KOu	WTu-KOu
Ank2	CTB	-0.81258	0	-0.738525	0	WTd	KOd	WTd-KOd
Ank2	EVT	0.25584	2.93072e-118	0.491624	1.61461e-51	WTu	KOu	WTu-KOu
Ank2	Stromal	0.459874	3.56362e-38	1.10229	0	WTu	KOu	WTu-KOu
Ank2	STB	1.33296	0	0.252394	1.50587e-99	WTu	KOu	WTu-KOu
Ank3	CTB	-0.636952	6.60756e-199	-0.52479	2.13827e-184	WTd	KOd	WTd-KOd
Ankfy1	STB	0.461581	7.33728e-204	0.389552	7.38264e-195	WTu	KOu	WTu-KOu
Ankfy1	Stromal	0.664683	8.56541e-64	0.481072	1.16772e-102	WTu	KOu	WTu-KOu
Ankfy1	Vascular	0.56878	1.08362e-35	0.65038	4.67024e-90	WTu	KOu	WTu-KOu
Ankfy1	CTB	-0.599704	0	-0.56639	0	WTd	KOd	WTd-KOd
Ankfy1	EVT	0.492002	8.18772e-232	0.509418	2.80102e-92	WTu	KOu	WTu-KOu
Ankhd1	Stromal	0.723925	6.43481e-66	0.80852	4.08895e-226	WTu	KOu	WTu-KOu
Ankhd1	Vascular	0.794771	5.13881e-52	0.734978	1.38998e-118	WTu	KOu	WTu-KOu
Ankhd1	CTB	-0.978244	0	-0.927157	0	WTd	KOd	WTd-KOd
Ankhd1	STB	0.866559	0	0.856834	0	WTu	KOu	WTu-KOu
Ankhd1	EVT	0.856727	0	0.769798	2.91117e-108	WTu	KOu	WTu-KOu
Ankib1	EVT	0.280965	1.06866e-113	0.61522	1.15979e-104	WTu	KOu	WTu-KOu
Ankib1	CTB	-0.623156	0	-0.629502	0	WTd	KOd	WTd-KOd
Ankib1	Vascular	0.538251	1.53916e-38	0.491485	1.34014e-68	WTu	KOu	WTu-KOu
Ankib1	STB	0.765185	0	0.264378	5.50441e-128	WTu	KOu	WTu-KOu
Ankib1	Stromal	0.544009	2.35697e-56	0.78373	2.13797e-233	WTu	KOu	WTu-KOu
Ankrd10	CTB	-0.512266	0	-0.554793	0	WTd	KOd	WTd-KOd
Ankrd10	Stromal	0.363703	2.24559e-28	0.785914	0	WTu	KOu	WTu-KOu
Ankrd11	Vascular	0.846904	4.2798e-66	0.98076	7.85014e-154	WTu	KOu	WTu-KOu
Ankrd11	Stromal	0.956306	2.19003e-94	0.985057	2.78044e-261	WTu	KOu	WTu-KOu
Ankrd11	CTB	-1.28437	0	-1.38749	0	WTd	KOd	WTd-KOd
Ankrd11	EVT	1.27491	0	1.26749	4.24013e-133	WTu	KOu	WTu-KOu
Ankrd11	STB	0.989229	0	1.4551	0	WTu	KOu	WTu-KOu
Ankrd12	EVT	1.26196	0	1.32994	2.17438e-183	WTu	KOu	WTu-KOu
Ankrd12	Stromal	0.358126	9.34829e-17	0.704498	1.67683e-190	WTu	KOu	WTu-KOu
Ankrd12	STB	0.714997	3.61476e-291	1.0859	0	WTu	KOu	WTu-KOu
Ankrd12	CTB	-0.96195	0	-0.922539	0	WTd	KOd	WTd-KOd
Ankrd13c	EVT	0.465273	1.22787e-179	1.02295	2.76846e-135	WTu	KOu	WTu-KOu
Ankrd13c	CTB	-0.267484	1.6674e-288	-0.291006	9.64581e-274	WTd	KOd	WTd-KOd
Ankrd17	STB	0.485691	1.05837e-118	1.30617	2.64105e-248	WTu	KOu	WTu-KOu
Ankrd17	EVT	1.57828	0	1.88054	7.35023e-121	WTu	KOu	WTu-KOu
Ankrd17	CTB	-1.03428	0	-1.08495	0	WTd	KOd	WTd-KOd
Ankrd27	Vascular	0.298263	4.59451e-20	0.268584	8.98371e-34	WTu	KOu	WTu-KOu
Ankrd28	Stromal	0.512354	7.67833e-37	0.343353	2.14078e-58	WTu	KOu	WTu-KOu
Ankrd28	STB	0.357823	1.78872e-159	0.518122	4.32262e-240	WTu	KOu	WTu-KOu
Ankrd28	EVT	0.549068	1.07769e-253	0.949707	1.24499e-170	WTu	KOu	WTu-KOu
Ankrd28	Vascular	1.89318	8.45776e-298	1.35398	0	WTu	KOu	WTu-KOu
Ankrd28	CTB	-0.883308	0	-0.864044	0	WTd	KOd	WTd-KOd
Ankrd33b	STB	0.319426	7.19272e-85	1.22676	0	WTu	KOu	WTu-KOu
Ankrd33b	CTB	-0.657866	0	-0.615268	0	WTd	KOd	WTd-KOd
Ankrd33b	EVT	1.09308	0	0.63957	1.64124e-93	WTu	KOu	WTu-KOu
Ankrd44	CTB	-1.21389	0	-1.24111	0	WTd	KOd	WTd-KOd
Ankrd44	EVT	0.407174	9.18636e-79	1.52187	0	WTu	KOu	WTu-KOu
Ankrd44	Stromal	1.92704	0	1.71252	0	WTu	KOu	WTu-KOu
Anks1	CTB	-0.890148	0	-0.953839	0	WTd	KOd	WTd-KOd
Anks1	EVT	0.970317	0	0.314723	3.74742e-49	WTu	KOu	WTu-KOu
Anks1	Vascular	1.19277	9.94312e-151	1.06481	1.73673e-234	WTu	KOu	WTu-KOu
Anks1	STB	0.327592	2.16193e-120	1.07203	0	WTu	KOu	WTu-KOu
Anks1	Stromal	0.67572	3.41123e-57	0.527284	3.22774e-98	WTu	KOu	WTu-KOu
Anks3	STB	0.251091	1.35227e-135	0.364966	5.4813e-286	WTu	KOu	WTu-KOu
Anks3	EVT	0.25461	6.9204e-174	0.26587	1.10116e-67	WTu	KOu	WTu-KOu
Anks3	CTB	-0.289431	0	-0.283974	0	WTd	KOd	WTd-KOd
Ano1	CTB	-0.394101	4.43645e-155	-0.482376	2.03996e-137	WTd	KOd	WTd-KOd
Ano10	STB	0.428349	6.14492e-180	0.271057	8.11917e-157	WTu	KOu	WTu-KOu
Ano10	CTB	-0.319117	0	-0.263376	1.26714e-250	WTd	KOd	WTd-KOd
Ano6	EVT	1.8741	0	0.757498	3.94193e-112	WTu	KOu	WTu-KOu
Ano6	CTB	-1.33065	0	-1.30529	0	WTd	KOd	WTd-KOd
Ano6	Vascular	0.988178	2.98299e-100	1.1156	5.70531e-243	WTu	KOu	WTu-KOu
Anp32a	Vascular	0.53502	7.56554e-46	0.439948	5.4621e-90	WTu	KOu	WTu-KOu
Anp32b	CTB	0.289099	5.60818e-55	0.393898	1.14695e-24	WTu	KOu	WTu-KOu
Antxr1	Vascular	0.288035	1.75651e-12	0.806511	9.87047e-106	WTu	KOu	WTu-KOu
Antxr1	Stromal	1.17116	1.19608e-163	0.674153	8.12983e-128	WTu	KOu	WTu-KOu
Antxr1	CTB	-0.615089	0	-0.460727	2.17497e-195	WTd	KOd	WTd-KOd
Antxr2	Stromal	0.303419	6.35766e-18	0.476066	3.01038e-92	WTu	KOu	WTu-KOu
Antxr2	CTB	-0.276959	3.31362e-177	-0.264999	2.38127e-159	WTd	KOd	WTd-KOd
Anxa11	CTB	-0.601243	0	-0.460905	1.05717e-211	WTd	KOd	WTd-KOd
Anxa3	EVT	0.29637	3.03464e-63	1.19243	5.69865e-126	WTu	KOu	WTu-KOu
Anxa3	STB	0.521431	5.84721e-129	-0.387573	1.07482e-06	WTu	KOd	WTu-KOd
Anxa3	Vascular	0.756567	5.4203e-64	0.433229	6.64262e-60	WTu	KOu	WTu-KOu
Anxa3	CTB	-0.484067	1.7079e-289	-0.493124	1.65503e-255	WTd	KOd	WTd-KOd
Anxa4	CTB	-0.336438	1.99385e-89	-0.277494	2.56204e-64	WTd	KOd	WTd-KOd
Anxa4	EVT	1.28652	1.0559e-264	0.566052	1.88394e-34	WTu	KOu	WTu-KOu
Anxa6	Vascular	0.652547	1.00034e-61	0.652862	3.03327e-143	WTu	KOu	WTu-KOu
Aopep	EVT	0.581641	1.91669e-231	1.01756	7.86352e-149	WTu	KOu	WTu-KOu
Aopep	Vascular	1.30855	7.4421e-158	1.40487	0	WTu	KOu	WTu-KOu
Aopep	STB	1.09113	0	0.298493	3.39663e-142	WTu	KOu	WTu-KOu
Aopep	CTB	-1.17096	0	-1.15342	0	WTd	KOd	WTd-KOd
Aopep	Stromal	1.21171	7.37194e-119	1.13955	0	WTu	KOu	WTu-KOu
Ap1g1	STB	0.52854	1.35575e-207	0.516863	3.18316e-218	WTu	KOu	WTu-KOu
Ap1g1	Vascular	0.363062	2.18853e-29	0.338254	1.3791e-48	WTu	KOu	WTu-KOu
Ap1g1	CTB	-0.497082	0	-0.554685	0	WTd	KOd	WTd-KOd
Ap1g1	Stromal	0.255247	1.01952e-20	0.579376	1.57983e-115	WTu	KOu	WTu-KOu
Ap1g1	EVT	0.434233	1.75146e-193	0.40536	8.06592e-55	WTu	KOu	WTu-KOu
Ap1s3	EVT	0.643017	2.67921e-162	1.7527	0	WTu	KOu	WTu-KOu
Ap1s3	CTB	-0.254379	2.19004e-169	-0.32556	2.33766e-200	WTd	KOd	WTd-KOd
Ap2a2	EVT	0.349229	2.8133e-67	1.43511	3.99342e-132	WTu	KOu	WTu-KOu
Ap2b1	EVT	0.473167	6.93128e-217	0.626529	9.30086e-71	WTu	KOu	WTu-KOu
Ap2b1	Vascular	0.313265	5.27916e-20	0.382861	1.80212e-50	WTu	KOu	WTu-KOu
Ap2b1	CTB	-0.411802	0	-0.43015	0	WTd	KOd	WTd-KOd
Ap2m1	CTB	0.449692	1.1552e-15	0.394317	2.52833e-15	WTu	KOu	WTu-KOu
Ap2m1	STB	-0.471157	0.00176204	-0.466777	6.41462e-06	WTd	KOd	WTd-KOd
Ap2s1	STB	-0.321274	1.34242e-05	-0.315458	0.00885075	WTd	KOd	WTd-KOd
Ap2s1	CTB	0.267656	4.21757e-30	0.281138	3.59779e-21	WTu	KOu	WTu-KOu
Ap3b1	Stromal	0.480876	4.20517e-45	0.584911	6.17651e-129	WTu	KOu	WTu-KOu
Ap3b1	STB	0.636553	2.96283e-231	1.20384	0	WTu	KOu	WTu-KOu
Ap3b1	EVT	1.1559	0	0.850882	1.80144e-94	WTu	KOu	WTu-KOu
Ap3b1	Vascular	0.617119	1.44425e-47	0.494323	1.71362e-76	WTu	KOu	WTu-KOu
Ap3b1	CTB	-0.958526	0	-0.933211	0	WTd	KOd	WTd-KOd
Ap4e1	Stromal	0.316541	1.50213e-33	0.277366	2.74454e-53	WTu	KOu	WTu-KOu
Ap4e1	STB	0.317333	1.91982e-178	0.416055	0	WTu	KOu	WTu-KOu
Ap4e1	Vascular	0.440733	2.75332e-31	0.401665	2.3545e-73	WTu	KOu	WTu-KOu
Ap4e1	EVT	0.316844	4.63316e-182	0.309262	5.23866e-57	WTu	KOu	WTu-KOu
Ap4e1	CTB	-0.381527	0	-0.398594	0	WTd	KOd	WTd-KOd
Apaf1	CTB	-0.566534	0	-0.592601	0	WTd	KOd	WTd-KOd
Apaf1	Stromal	0.628702	1.12656e-62	0.791197	9.68604e-232	WTu	KOu	WTu-KOu
Apaf1	STB	0.719775	0	0.332769	4.02404e-166	WTu	KOu	WTu-KOu
Apaf1	Vascular	0.361243	5.55644e-29	0.562378	1.47238e-99	WTu	KOu	WTu-KOu
Apba1	STB	0.825668	0	0.665297	2.22211e-219	WTu	KOu	WTu-KOu
Apba1	Stromal	0.421291	7.10442e-22	0.533732	4.77613e-119	WTu	KOu	WTu-KOu
Apba1	CTB	-0.460461	0	-0.52217	0	WTd	KOd	WTd-KOd
Apbb1ip	Stromal	1.14293	5.45369e-122	0.839477	1.08584e-216	WTu	KOu	WTu-KOu
Apbb2	EVT	1.02207	2.84277e-276	0.860605	5.56043e-78	WTu	KOu	WTu-KOu
Apbb2	Stromal	1.15962	1.53189e-68	1.04551	1.24137e-199	WTu	KOu	WTu-KOu
Apbb2	Vascular	2.09492	2.97602e-246	1.93505	0	WTu	KOu	WTu-KOu
Apbb2	STB	1.32454	0	1.3087	0	WTu	KOu	WTu-KOu
Apbb2	CTB	-1.64651	0	-1.63541	0	WTd	KOd	WTd-KOd
Apc	Stromal	0.381357	9.06111e-22	0.404967	2.10227e-102	WTu	KOu	WTu-KOu
Apc	STB	0.618227	9.85527e-208	1.03792	0	WTu	KOu	WTu-KOu
Apc	Vascular	0.658846	1.40518e-44	0.57791	3.62127e-90	WTu	KOu	WTu-KOu
Apc	CTB	-0.782101	0	-0.80016	0	WTd	KOd	WTd-KOd
Apc	EVT	0.83735	0	0.758153	7.48895e-93	WTu	KOu	WTu-KOu
Apcdd1	Vascular	0.750954	3.99053e-203	0.662449	5.00646e-218	WTu	KOu	WTu-KOu
Apex2	CTB	-0.682462	0	-0.683317	0	WTd	KOd	WTd-KOd
Apex2	Vascular	1.09568	9.79537e-138	1.06397	0	WTu	KOu	WTu-KOu
Apex2	Stromal	0.436913	4.13392e-42	0.373416	6.0279e-66	WTu	KOu	WTu-KOu
Apex2	STB	0.464672	5.01213e-213	0.504978	0	WTu	KOu	WTu-KOu
Apex2	EVT	0.542442	1.78921e-302	0.348254	8.76399e-63	WTu	KOu	WTu-KOu
Aph1a	CTB	0.282529	4.33445e-26	0.274863	1.16649e-23	WTu	KOu	WTu-KOu
Aph1a	STB	-0.317956	5.31801e-06	-0.269019	1.62815e-11	WTd	KOd	WTd-KOd
Aplnr	Vascular	1.13576	1.5994e-295	0.582128	7.41684e-124	WTu	KOu	WTu-KOu
Aplp2	EVT	-0.389778	0.00455492	0.270225	3.42054e-13	WTd	KOd	WTd-KOd
Apobec1	Stromal	0.779978	1.85012e-122	0.950321	2.81937e-298	WTu	KOu	WTu-KOu
Apobec3	Vascular	0.781694	2.90108e-232	0.69905	3.83142e-278	WTu	KOu	WTu-KOu
Apoe	Stromal	1.39034	4.37718e-65	0.955478	1.65696e-24	WTu	KOu	WTu-KOu
App	STB	0.749601	2.51143e-119	0.612395	7.163e-57	WTu	KOu	WTu-KOu
App	CTB	-0.650707	2.43193e-274	-0.558691	1.60642e-201	WTd	KOd	WTd-KOd
App	Vascular	1.1882	2.45993e-104	1.01836	5.18481e-140	WTu	KOu	WTu-KOu
Appl1	STB	0.507028	3.17091e-200	0.486224	3.82893e-212	WTu	KOu	WTu-KOu
Appl1	CTB	-0.457308	0	-0.36077	0	WTd	KOd	WTd-KOd
Appl2	Stromal	0.256142	3.53302e-11	0.473074	8.60214e-132	WTu	KOu	WTu-KOu
Appl2	STB	0.480436	4.74435e-240	0.434934	4.60265e-210	WTu	KOu	WTu-KOu
Appl2	EVT	0.307753	3.45433e-156	0.439697	5.83697e-71	WTu	KOu	WTu-KOu
Appl2	CTB	-0.366379	0	-0.408037	0	WTd	KOd	WTd-KOd
Aqp1	CTB	0.339469	3.64141e-05	0.351698	0.0282893	WTu	KOu	WTu-KOu
Arap2	CTB	-0.646683	0	-0.550507	0	WTd	KOd	WTd-KOd
Arap2	Stromal	0.591833	2.56952e-23	0.327781	2.36965e-51	WTu	KOu	WTu-KOu
Arap2	Vascular	1.0937	1.57921e-109	0.799994	6.57159e-108	WTu	KOu	WTu-KOu
Arap2	EVT	0.471635	2.93832e-130	0.988615	3.88502e-132	WTu	KOu	WTu-KOu
Arap3	Vascular	1.25605	0	0.861756	0	WTu	KOu	WTu-KOu
Arf1	CTB	0.446284	4.83884e-26	0.425141	5.05836e-10	WTu	KOu	WTu-KOu
Arf1	STB	-0.547232	0.0286972	-0.37331	5.99085e-11	WTd	KOd	WTd-KOd
Arf2	CTB	0.334479	6.99897e-22	0.281132	6.24304e-25	WTu	KOu	WTu-KOu
Arf2	STB	-0.377338	6.37527e-08	-0.358618	1.46767e-06	WTd	KOd	WTd-KOd
Arf5	CTB	0.527645	1.12006e-09	0.48097	7.83642e-06	WTu	KOu	WTu-KOu
Arf5	STB	-0.551409	0.0470629	-0.441061	6.64331e-07	WTd	KOd	WTd-KOd
Arf6	CTB	0.354734	5.70221e-11	0.289333	1.65467e-15	WTu	KOu	WTu-KOu
Arf6	STB	-0.380374	0.000269275	-0.277384	2.31386e-08	WTd	KOd	WTd-KOd
Arfgap1	EVT	0.370907	2.08261e-181	0.321041	2.19791e-65	WTu	KOu	WTu-KOu
Arfgap1	CTB	-0.323541	0	-0.310123	1.45117e-287	WTd	KOd	WTd-KOd
Arfgap3	CTB	-0.292927	2.31648e-283	-0.25477	3.43811e-228	WTd	KOd	WTd-KOd
Arfgef1	Stromal	0.277939	3.1558e-17	0.517369	1.49334e-101	WTu	KOu	WTu-KOu
Arfgef1	EVT	0.583922	2.66117e-206	0.750798	3.57527e-70	WTu	KOu	WTu-KOu
Arfgef1	Vascular	0.535866	1.03867e-34	0.417331	2.07302e-51	WTu	KOu	WTu-KOu
Arfgef1	CTB	-0.635695	0	-0.637756	0	WTd	KOd	WTd-KOd
Arfgef1	STB	0.629044	9.55904e-212	0.640986	9.19579e-196	WTu	KOu	WTu-KOu
Arfgef2	CTB	-0.469939	0	-0.473442	0	WTd	KOd	WTd-KOd
Arfgef2	EVT	0.623371	6.35989e-268	0.867784	1.98662e-138	WTu	KOu	WTu-KOu
Arfgef2	STB	0.364013	1.88517e-141	0.516056	6.43382e-201	WTu	KOu	WTu-KOu
Arglu1	Stromal	0.692524	7.30069e-64	0.63638	9.42984e-176	WTu	KOu	WTu-KOu
Arglu1	Vascular	1.13909	4.90753e-132	0.98744	2.41311e-208	WTu	KOu	WTu-KOu
Arglu1	STB	0.630957	8.79838e-243	0.754243	0	WTu	KOu	WTu-KOu
Arglu1	CTB	-0.966433	0	-0.909781	0	WTd	KOd	WTd-KOd
Arglu1	EVT	0.917501	0	0.895393	4.22808e-129	WTu	KOu	WTu-KOu
Arhgap10	CTB	-1.83423	0	-1.8304	0	WTd	KOd	WTd-KOd
Arhgap10	STB	1.432	0	2.04367	0	WTu	KOu	WTu-KOu
Arhgap10	EVT	2.19334	0	1.98988	2.0017e-148	WTu	KOu	WTu-KOu
Arhgap10	Stromal	0.589991	4.00911e-29	1.35748	1.81757e-246	WTu	KOu	WTu-KOu
Arhgap12	Vascular	0.634447	3.48463e-49	0.680428	6.43961e-104	WTu	KOu	WTu-KOu
Arhgap12	EVT	0.317398	9.27421e-136	0.704024	2.6234e-122	WTu	KOu	WTu-KOu
Arhgap12	CTB	-0.69215	0	-0.664205	0	WTd	KOd	WTd-KOd
Arhgap12	Stromal	0.615456	1.86981e-57	0.710196	8.0704e-200	WTu	KOu	WTu-KOu
Arhgap12	STB	0.820632	0	0.279766	2.60696e-151	WTu	KOu	WTu-KOu
Arhgap15	Stromal	2.47716	0	1.58272	0	WTu	KOu	WTu-KOu
Arhgap17	EVT	0.303511	6.73709e-123	0.363103	6.40775e-47	WTu	KOu	WTu-KOu
Arhgap17	STB	0.884924	0	0.547447	2.64581e-246	WTu	KOu	WTu-KOu
Arhgap17	Vascular	0.570751	2.70382e-40	0.40145	2.30544e-47	WTu	KOu	WTu-KOu
Arhgap17	Stromal	0.697341	4.52576e-45	0.817927	5.52013e-257	WTu	KOu	WTu-KOu
Arhgap17	CTB	-0.72389	0	-0.685365	0	WTd	KOd	WTd-KOd
Arhgap18	Vascular	0.368281	1.22275e-19	0.317312	7.27869e-27	WTu	KOu	WTu-KOu
Arhgap18	STB	0.887364	8.18702e-125	1.08454	4.29523e-264	WTu	KOu	WTu-KOu
Arhgap18	CTB	-0.610546	0	-0.634913	0	WTd	KOd	WTd-KOd
Arhgap18	EVT	0.319895	1.22585e-146	0.516432	7.00248e-70	WTu	KOu	WTu-KOu
Arhgap21	STB	0.746825	8.58969e-237	1.25299	0	WTu	KOu	WTu-KOu
Arhgap21	CTB	-0.839824	0	-0.790689	0	WTd	KOd	WTd-KOd
Arhgap21	EVT	1.07395	0	0.322171	1.56632e-35	WTu	KOu	WTu-KOu
Arhgap22	STB	0.50357	3.53912e-215	1.3528	0	WTu	KOu	WTu-KOu
Arhgap22	CTB	-0.74623	0	-0.700288	0	WTd	KOd	WTd-KOd
Arhgap23	EVT	1.04056	0	0.82505	1.10422e-104	WTu	KOu	WTu-KOu
Arhgap23	STB	0.434467	8.12318e-174	0.936875	0	WTu	KOu	WTu-KOu
Arhgap23	Vascular	0.530391	8.77436e-27	0.527724	6.25264e-65	WTu	KOu	WTu-KOu
Arhgap23	CTB	-0.795917	0	-0.688151	0	WTd	KOd	WTd-KOd
Arhgap24	Stromal	1.5045	5.50268e-291	1.15835	0	WTu	KOu	WTu-KOu
Arhgap24	CTB	-0.656803	0	-0.829655	0	WTd	KOd	WTd-KOd
Arhgap26.1	Vascular	1.06411	1.37154e-168	0.942867	2.47462e-244	WTu	KOu	WTu-KOu
Arhgap26.1	CTB	-0.618002	0	-0.636834	0	WTd	KOd	WTd-KOd
Arhgap26.1	EVT	0.642985	5.41924e-116	1.57106	0	WTu	KOu	WTu-KOu
Arhgap27	Vascular	0.688088	1.25917e-78	0.285197	3.92877e-47	WTu	KOu	WTu-KOu
Arhgap28	Stromal	0.694201	3.97333e-30	0.921695	4.72683e-119	WTu	KOu	WTu-KOu
Arhgap28	EVT	0.776368	0	0.432762	2.1506e-54	WTu	KOu	WTu-KOu
Arhgap28	Vascular	0.793278	1.7895e-58	0.914058	5.74426e-133	WTu	KOu	WTu-KOu
Arhgap28	CTB	-1.16651	0	-1.14622	0	WTd	KOd	WTd-KOd
Arhgap28	STB	1.32956	0	1.23963	0	WTu	KOu	WTu-KOu
Arhgap29	Vascular	2.2321	0	1.49291	1.41922e-224	WTu	KOu	WTu-KOu
Arhgap29	CTB	-0.823217	0	-0.726066	0	WTd	KOd	WTd-KOd
Arhgap31	EVT	1.34363	0	0.55469	7.98186e-59	WTu	KOu	WTu-KOu
Arhgap31	STB	0.407384	5.92124e-74	1.73481	0	WTu	KOu	WTu-KOu
Arhgap31	CTB	-1.26978	0	-1.29255	0	WTd	KOd	WTd-KOd
Arhgap31	Vascular	1.71732	1.12236e-195	1.5075	3.72865e-278	WTu	KOu	WTu-KOu
Arhgap32	EVT	0.603529	9.70687e-236	1.30279	0	WTu	KOu	WTu-KOu
Arhgap32	CTB	-0.416709	1.36826e-293	-0.422701	6.83517e-294	WTd	KOd	WTd-KOd
Arhgap35	Stromal	0.604391	2.86714e-77	0.286455	1.01728e-78	WTu	KOu	WTu-KOu
Arhgap35	CTB	-0.402852	0	-0.387311	0	WTd	KOd	WTd-KOd
Arhgap35	Vascular	0.689893	5.34541e-64	0.757106	5.44688e-178	WTu	KOu	WTu-KOu
Arhgap39	CTB	-0.552967	7.69492e-264	-0.533963	2.71848e-233	WTd	KOd	WTd-KOd
Arhgap42	STB	1.01969	0	0.543058	2.39752e-243	WTu	KOu	WTu-KOu
Arhgap42	EVT	0.565317	3.03029e-240	0.989089	3.46109e-143	WTu	KOu	WTu-KOu
Arhgap42	CTB	-0.954509	0	-0.971636	0	WTd	KOd	WTd-KOd
Arhgap42	Stromal	1.35205	2.71404e-56	0.879904	3.80997e-187	WTu	KOu	WTu-KOu
Arhgap44	EVT	0.509201	3.63e-171	1.38759	0	WTu	KOu	WTu-KOu
Arhgap45	Stromal	1.07435	0	0.762846	4.28551e-217	WTu	KOu	WTu-KOu
Arhgap5	STB	0.4198	9.3836e-128	0.683717	1.25333e-204	WTu	KOu	WTu-KOu
Arhgap5	EVT	0.613432	2.61499e-221	0.753768	2.07396e-77	WTu	KOu	WTu-KOu
Arhgap5	CTB	-0.479426	0	-0.498199	0	WTd	KOd	WTd-KOd
Arhgap6	CTB	-2.71502	0	-2.64362	0	WTd	KOd	WTd-KOd
Arhgap6	EVT	0.916431	4.85377e-273	-0.521984	2.02897e-06	WTu	KOd	WTu-KOd
Arhgap6	Stromal	1.07862	6.11532e-87	3.3384	3.48895e-218	WTu	KOu	WTu-KOu
Arhgap6	STB	3.44905	2.47685e-274	1.14539	0	WTu	KOu	WTu-KOu
Arhgap8	STB	0.314507	2.55403e-122	0.579939	0	WTu	KOu	WTu-KOu
Arhgdia	STB	-0.474602	0.000757626	-0.519028	0.00399754	WTd	KOd	WTd-KOd
Arhgef1	CTB	-0.344196	0	-0.399577	0	WTd	KOd	WTd-KOd
Arhgef1	EVT	0.293418	1.11112e-155	0.465445	2.25227e-72	WTu	KOu	WTu-KOu
Arhgef1	Vascular	0.383404	2.634e-19	0.345297	1.33845e-46	WTu	KOu	WTu-KOu
Arhgef1	STB	0.271883	5.92261e-118	0.520317	6.5051e-262	WTu	KOu	WTu-KOu
Arhgef10	CTB	-0.352988	2.32779e-300	-0.379021	0	WTd	KOd	WTd-KOd
Arhgef10	Vascular	0.848499	1.85936e-93	0.582988	4.5396e-108	WTu	KOu	WTu-KOu
Arhgef10	STB	0.264693	2.80597e-130	0.271316	1.40279e-132	WTu	KOu	WTu-KOu
Arhgef10l	Stromal	0.344568	3.1597e-26	0.330256	4.04914e-69	WTu	KOu	WTu-KOu
Arhgef10l	CTB	-0.278296	5.67007e-210	-0.29645	2.8371e-221	WTd	KOd	WTd-KOd
Arhgef11	Vascular	0.296796	2.82381e-14	0.426412	2.82634e-62	WTu	KOu	WTu-KOu
Arhgef11	CTB	-1.02459	0	-1.11206	0	WTd	KOd	WTd-KOd
Arhgef11	STB	0.500018	4.7096e-198	1.5491	0	WTu	KOu	WTu-KOu
Arhgef11	Stromal	0.320207	2.44235e-25	0.454957	1.37988e-110	WTu	KOu	WTu-KOu
Arhgef11	EVT	1.47725	0	1.30625	1.27575e-197	WTu	KOu	WTu-KOu
Arhgef12	STB	0.991654	0	0.865295	4.44169e-238	WTu	KOu	WTu-KOu
Arhgef12	CTB	-1.10864	0	-1.03613	0	WTd	KOd	WTd-KOd
Arhgef12	EVT	0.917301	8.25534e-275	1.47155	2.81651e-116	WTu	KOu	WTu-KOu
Arhgef12	Vascular	1.23884	4.96344e-113	0.947557	8.03355e-137	WTu	KOu	WTu-KOu
Arhgef12	Stromal	0.499943	7.10285e-31	0.647967	5.73492e-111	WTu	KOu	WTu-KOu
Arhgef15	Vascular	1.02538	0	0.751072	0	WTu	KOu	WTu-KOu
Arhgef18	CTB	-0.389676	3.30608e-291	-0.466268	0	WTd	KOd	WTd-KOd
Arhgef18	Stromal	0.446005	4.42768e-15	0.270279	4.21953e-37	WTu	KOu	WTu-KOu
Arhgef18	EVT	0.680689	2.93343e-223	1.62901	1.19515e-250	WTu	KOu	WTu-KOu
Arhgef2	Vascular	0.689341	7.43249e-69	0.32143	1.23709e-46	WTu	KOu	WTu-KOu
Arhgef26	Vascular	1.66429	0	1.08965	0	WTu	KOu	WTu-KOu
Arhgef28	Stromal	1.02646	3.53784e-54	0.77329	1.33477e-212	WTu	KOu	WTu-KOu
Arhgef28	CTB	-0.571683	1.17878e-296	-0.491925	1.45642e-262	WTd	KOd	WTd-KOd
Arhgef28	Vascular	0.322258	4.29274e-22	0.564199	1.84867e-84	WTu	KOu	WTu-KOu
Arhgef3	EVT	1.13764	0	1.86702	9.76321e-281	WTu	KOu	WTu-KOu
Arhgef3	Vascular	1.45668	7.78485e-172	1.09236	1.27034e-163	WTu	KOu	WTu-KOu
Arhgef3	CTB	-0.913465	0	-0.914897	0	WTd	KOd	WTd-KOd
Arhgef37	EVT	0.507665	9.95976e-210	1.18636	0	WTu	KOu	WTu-KOu
Arhgef40	Vascular	0.474098	2.78058e-111	0.462441	6.04119e-239	WTu	KOu	WTu-KOu
Arhgef6	EVT	0.569735	3.07072e-67	1.75548	1.01719e-109	WTu	KOu	WTu-KOu
Arhgef7	Vascular	0.719656	9.84799e-71	0.695081	4.87955e-133	WTu	KOu	WTu-KOu
Arhgef7	CTB	-0.264789	2.87791e-246	-0.297431	5.88982e-270	WTd	KOd	WTd-KOd
Arid1a	STB	0.405841	8.88059e-170	0.576493	4.01229e-219	WTu	KOu	WTu-KOu
Arid1a	Vascular	0.580194	6.24079e-46	0.565176	1.40433e-76	WTu	KOu	WTu-KOu
Arid1a	Stromal	0.587201	4.55218e-44	0.448315	3.37076e-81	WTu	KOu	WTu-KOu
Arid1a	CTB	-0.50463	0	-0.543822	0	WTd	KOd	WTd-KOd
Arid1b	CTB	-1.38733	0	-1.43848	0	WTd	KOd	WTd-KOd
Arid1b	Stromal	0.791715	1.60838e-77	0.928895	2.44488e-209	WTu	KOu	WTu-KOu
Arid1b	STB	1.38137	0	1.08298	1.46931e-210	WTu	KOu	WTu-KOu
Arid1b	Vascular	0.262476	1.77425e-26	0.690821	5.2865e-113	WTu	KOu	WTu-KOu
Arid1b	EVT	1.31626	2.44909e-236	2.56956	9.02496e-213	WTu	KOu	WTu-KOu
Arid2	STB	0.793462	0	0.895745	0	WTu	KOu	WTu-KOu
Arid2	Vascular	0.816741	7.05392e-69	0.871925	3.03818e-150	WTu	KOu	WTu-KOu
Arid2	Stromal	0.65359	7.31758e-52	0.635041	1.86745e-143	WTu	KOu	WTu-KOu
Arid2	EVT	0.789563	0	0.517441	1.01479e-64	WTu	KOu	WTu-KOu
Arid2	CTB	-0.90717	0	-0.880746	0	WTd	KOd	WTd-KOd
Arid3a	EVT	0.449066	1.65698e-199	0.427219	5.6276e-50	WTu	KOu	WTu-KOu
Arid3b	Vascular	0.271369	1.63364e-18	0.333377	2.10374e-51	WTu	KOu	WTu-KOu
Arid3b	EVT	0.266368	1.4305e-104	1.08761	8.82017e-244	WTu	KOu	WTu-KOu
Arid4a	STB	0.496922	1.24016e-240	0.298422	5.58577e-152	WTu	KOu	WTu-KOu
Arid4a	Vascular	0.462933	5.34201e-33	0.353323	1.45745e-47	WTu	KOu	WTu-KOu
Arid4a	Stromal	0.718462	2.71036e-69	0.698625	6.99492e-186	WTu	KOu	WTu-KOu
Arid4a	CTB	-0.514321	0	-0.512188	0	WTd	KOd	WTd-KOd
Arid4b	Vascular	0.428466	9.41293e-25	0.534896	4.02967e-75	WTu	KOu	WTu-KOu
Arid4b	STB	0.974434	0	0.906416	1.44859e-298	WTu	KOu	WTu-KOu
Arid4b	CTB	-0.930445	0	-0.937229	0	WTd	KOd	WTd-KOd
Arid4b	Stromal	0.483432	5.57512e-30	0.856034	4.57742e-206	WTu	KOu	WTu-KOu
Arid4b	EVT	0.852686	0	0.932808	1.93767e-108	WTu	KOu	WTu-KOu
Arid5b	Vascular	0.340251	3.12283e-20	0.869341	9.66717e-96	WTu	KOu	WTu-KOu
Arid5b	STB	1.72283	0	1.46139	0	WTu	KOu	WTu-KOu
Arid5b	CTB	-1.65148	0	-1.64191	0	WTd	KOd	WTd-KOd
Arid5b	Stromal	1.01404	8.39726e-72	1.46422	0	WTu	KOu	WTu-KOu
Arid5b	EVT	1.37411	0	1.65834	7.07922e-140	WTu	KOu	WTu-KOu
Arih1	Vascular	1.01134	3.24597e-82	0.732585	1.82247e-112	WTu	KOu	WTu-KOu
Arih1	CTB	-1.19239	0	-1.13663	0	WTd	KOd	WTd-KOd
Arih1	STB	1.19383	0	0.997562	0	WTu	KOu	WTu-KOu
Arih1	Stromal	0.810906	1.01221e-63	1.11365	4.24704e-268	WTu	KOu	WTu-KOu
Arih1	EVT	0.871534	0	0.913482	7.00452e-96	WTu	KOu	WTu-KOu
Arih2	EVT	0.755448	0	0.46168	1.34201e-65	WTu	KOu	WTu-KOu
Arih2	STB	0.630187	6.9938e-279	0.801773	0	WTu	KOu	WTu-KOu
Arih2	CTB	-0.680839	0	-0.669666	0	WTd	KOd	WTd-KOd
Arih2	Vascular	0.335546	5.03836e-22	0.327049	1.30936e-37	WTu	KOu	WTu-KOu
Arih2	Stromal	0.257954	4.03715e-21	0.582836	3.16264e-136	WTu	KOu	WTu-KOu
Arl1	CTB	0.281524	1.39404e-45	0.384234	1.43319e-18	WTu	KOu	WTu-KOu
Arl1	STB	-0.301321	8.60632e-12	-0.325071	1.53704e-17	WTd	KOd	WTd-KOd
Arl15	Stromal	1.18107	1.54658e-122	0.647924	2.51828e-190	WTu	KOu	WTu-KOu
Arl15	Vascular	2.65391	0	2.27287	0	WTu	KOu	WTu-KOu
Arl15	EVT	2.20601	1.48094e-168	3.97244	0	WTu	KOu	WTu-KOu
Arl15	CTB	-2.13429	0	-2.22448	0	WTd	KOd	WTd-KOd
Arl6ip1	CTB	0.485528	1.21429e-14	0.487089	4.82979e-05	WTu	KOu	WTu-KOu
Armc8	EVT	0.399748	8.48742e-186	0.309915	1.10634e-42	WTu	KOu	WTu-KOu
Armc8	Vascular	0.304645	7.78534e-13	0.355592	9.63583e-53	WTu	KOu	WTu-KOu
Armc8	CTB	-0.353722	0	-0.354192	0	WTd	KOd	WTd-KOd
Armc9	STB	0.311622	2.84966e-176	0.263886	2.66442e-190	WTu	KOu	WTu-KOu
Armc9	CTB	-0.258914	0	-0.329241	0	WTd	KOd	WTd-KOd
Armcx4	Vascular	0.576582	2.41453e-157	0.360729	1.94382e-145	WTu	KOu	WTu-KOu
Armh3	Vascular	0.661165	1.30971e-59	0.712655	4.695e-136	WTu	KOu	WTu-KOu
Armh3	Stromal	0.408095	8.80389e-34	0.684681	3.8049e-165	WTu	KOu	WTu-KOu
Armh3	CTB	-0.72645	0	-0.782104	0	WTd	KOd	WTd-KOd
Armh3	EVT	0.615962	0	0.840084	8.50825e-169	WTu	KOu	WTu-KOu
Armh3	STB	0.70974	0	0.59468	0	WTu	KOu	WTu-KOu
Arnt	CTB	-0.615831	0	-0.644411	0	WTd	KOd	WTd-KOd
Arnt	Vascular	0.54438	3.1131e-39	0.526553	1.25353e-83	WTu	KOu	WTu-KOu
Arnt	Stromal	0.445179	1.018e-36	0.473971	1.63513e-114	WTu	KOu	WTu-KOu
Arnt	STB	0.465241	2.21592e-204	0.784319	0	WTu	KOu	WTu-KOu
Arnt2	CTB	-0.360836	5.46405e-220	-0.259614	4.13418e-158	WTd	KOd	WTd-KOd
Arntl	CTB	-0.685916	0	-0.583536	0	WTd	KOd	WTd-KOd
Arntl	STB	0.510035	7.48945e-212	1.03657	0	WTu	KOu	WTu-KOu
Arpc3	CTB	0.312035	2.08847e-54	0.370897	2.23621e-25	WTu	KOu	WTu-KOu
Arpc3	STB	-0.328309	1.11131e-20	-0.331603	9.5363e-22	WTd	KOd	WTd-KOd
Arrb1	STB	0.345148	8.72651e-131	0.423474	8.2671e-211	WTu	KOu	WTu-KOu
Arrb1	CTB	-0.291539	1.97689e-293	-0.279834	2.11203e-271	WTd	KOd	WTd-KOd
Asah2	Vascular	0.710098	1.85087e-65	0.503278	9.98579e-88	WTu	KOu	WTu-KOu
Asap1	STB	0.555333	5.01214e-173	1.15147	0	WTu	KOu	WTu-KOu
Asap1	Vascular	0.566812	4.26915e-38	1.31572	3.60652e-238	WTu	KOu	WTu-KOu
Asap1	Stromal	1.51415	4.46395e-172	0.753042	1.97102e-105	WTu	KOu	WTu-KOu
Asap1	CTB	-1.1412	0	-1.32354	0	WTd	KOd	WTd-KOd
Asap1	EVT	1.15088	0	1.5861	3.46734e-187	WTu	KOu	WTu-KOu
Asap2	Vascular	1.3351	1.8816e-253	1.03675	6.21898e-303	WTu	KOu	WTu-KOu
Asap2	CTB	-0.632789	0	-0.623631	0	WTd	KOd	WTd-KOd
Asap3	CTB	-0.292933	3.76511e-213	-0.260867	6.60792e-207	WTd	KOd	WTd-KOd
Asap3	EVT	0.719984	0	0.936659	0	WTu	KOu	WTu-KOu
Asb3	STB	0.375275	2.0504e-213	0.474574	0	WTu	KOu	WTu-KOu
Asb3	Stromal	0.460973	5.33438e-32	0.421727	4.92321e-106	WTu	KOu	WTu-KOu
Asb3	Vascular	0.573231	5.92408e-34	0.455106	1.30313e-61	WTu	KOu	WTu-KOu
Asb3	CTB	-0.507583	0	-0.479562	0	WTd	KOd	WTd-KOd
Asb7	Vascular	0.358617	3.93424e-21	0.285161	5.39228e-38	WTu	KOu	WTu-KOu
Ascc2	EVT	0.257022	4.85964e-147	0.42946	5.61723e-127	WTu	KOu	WTu-KOu
Ascc2	CTB	-0.279326	0	-0.259862	0	WTd	KOd	WTd-KOd
Ascc3	STB	0.93486	0	1.10311	0	WTu	KOu	WTu-KOu
Ascc3	Vascular	0.687642	1.72971e-44	0.862312	6.57997e-139	WTu	KOu	WTu-KOu
Ascc3	EVT	1.05358	0	0.443042	3.92163e-46	WTu	KOu	WTu-KOu
Ascc3	CTB	-1.0985	0	-1.05252	0	WTd	KOd	WTd-KOd
Ascc3	Stromal	0.808803	9.77092e-74	0.871831	8.84387e-212	WTu	KOu	WTu-KOu
Ash1l	CTB	-0.985157	0	-1.00248	0	WTd	KOd	WTd-KOd
Ash1l	Stromal	0.68643	1.1389e-55	0.830547	4.60708e-219	WTu	KOu	WTu-KOu
Ash1l	STB	0.896508	0	0.888472	0	WTu	KOu	WTu-KOu
Ash1l	Vascular	0.886753	1.55288e-59	0.873364	4.90922e-155	WTu	KOu	WTu-KOu
Ash1l	EVT	0.821423	0	0.885985	4.36754e-95	WTu	KOu	WTu-KOu
Asph	Stromal	0.27273	7.33494e-14	0.415181	3.29618e-63	WTu	KOu	WTu-KOu
Asxl1	CTB	-0.817936	0	-0.852041	0	WTd	KOd	WTd-KOd
Asxl1	Stromal	0.889582	4.41746e-104	0.848735	1.50008e-246	WTu	KOu	WTu-KOu
Asxl1	EVT	0.340684	5.38103e-148	0.550284	1.19948e-76	WTu	KOu	WTu-KOu
Asxl1	STB	0.77572	0	0.505159	6.57834e-243	WTu	KOu	WTu-KOu
Asxl1	Vascular	1.07475	1.77974e-105	0.924975	3.67765e-188	WTu	KOu	WTu-KOu
Asxl2	Stromal	0.72342	7.07392e-74	0.904405	2.11232e-282	WTu	KOu	WTu-KOu
Asxl2	CTB	-0.877332	0	-0.908655	0	WTd	KOd	WTd-KOd
Asxl2	Vascular	0.487249	6.34015e-31	0.603463	2.90393e-87	WTu	KOu	WTu-KOu
Asxl2	STB	0.866024	0	0.808943	0	WTu	KOu	WTu-KOu
Asxl2	EVT	0.735898	0	0.702212	1.92329e-113	WTu	KOu	WTu-KOu
Atad2	Vascular	0.436893	1.40229e-27	0.420759	1.38151e-64	WTu	KOu	WTu-KOu
Atad2b	EVT	0.687659	0	0.705173	1.48051e-96	WTu	KOu	WTu-KOu
Atad2b	STB	0.731631	0	0.611886	1.55711e-277	WTu	KOu	WTu-KOu
Atad2b	Stromal	0.941089	6.10334e-87	0.781638	9.94794e-203	WTu	KOu	WTu-KOu
Atad2b	CTB	-0.918367	0	-0.859279	0	WTd	KOd	WTd-KOd
Atad2b	Vascular	0.954859	1.6936e-93	0.872998	4.43373e-177	WTu	KOu	WTu-KOu
Atf2	STB	0.520646	5.23397e-238	0.607518	1.90559e-276	WTu	KOu	WTu-KOu
Atf2	EVT	0.496394	8.56796e-231	0.312539	8.81908e-50	WTu	KOu	WTu-KOu
Atf2	Stromal	0.286563	2.56824e-21	0.44283	3.94063e-99	WTu	KOu	WTu-KOu
Atf2	CTB	-0.505297	0	-0.53708	0	WTd	KOd	WTd-KOd
Atf6	Stromal	0.266371	1.03557e-15	0.263638	2.56163e-53	WTu	KOu	WTu-KOu
Atf6	EVT	0.501732	2.92529e-167	0.397482	4.40348e-46	WTu	KOu	WTu-KOu
Atf6	CTB	-0.33453	3.40129e-295	-0.336505	3.42361e-254	WTd	KOd	WTd-KOd
Atf7ip	Stromal	0.735285	5.35962e-59	0.620083	3.10452e-137	WTu	KOu	WTu-KOu
Atf7ip	CTB	-0.71428	0	-0.654696	0	WTd	KOd	WTd-KOd
Atf7ip	STB	0.527027	1.41987e-212	0.72562	0	WTu	KOu	WTu-KOu
Atg10	STB	0.37432	1.08228e-176	0.751771	0	WTu	KOu	WTu-KOu
Atg10	EVT	0.738184	0	0.520477	3.43421e-105	WTu	KOu	WTu-KOu
Atg10	CTB	-0.65944	0	-0.604615	0	WTd	KOd	WTd-KOd
Atg10	Stromal	0.484035	8.35062e-39	0.366354	2.71028e-77	WTu	KOu	WTu-KOu
Atg10	Vascular	0.679181	1.63425e-52	0.465788	1.6364e-76	WTu	KOu	WTu-KOu
Atg16l1	Stromal	0.400913	6.629e-24	0.466478	8.11021e-122	WTu	KOu	WTu-KOu
Atg16l1	EVT	0.422167	4.89444e-210	0.330044	4.05693e-56	WTu	KOu	WTu-KOu
Atg16l1	STB	0.5129	6.45823e-276	0.530935	0	WTu	KOu	WTu-KOu
Atg16l1	Vascular	0.309369	8.06454e-11	0.298664	1.95806e-37	WTu	KOu	WTu-KOu
Atg16l1	CTB	-0.501847	0	-0.493131	0	WTd	KOd	WTd-KOd
Atg16l2	CTB	-0.379143	0	-0.357404	0	WTd	KOd	WTd-KOd
Atg2b	EVT	0.889173	0	0.648743	3.53855e-117	WTu	KOu	WTu-KOu
Atg2b	CTB	-0.45473	0	-0.493678	0	WTd	KOd	WTd-KOd
Atg3	Vascular	0.285833	5.16122e-14	0.311481	1.4359e-40	WTu	KOu	WTu-KOu
Atg3	CTB	-0.326641	0	-0.309985	0	WTd	KOd	WTd-KOd
Atg3	Stromal	0.384522	3.55689e-18	0.340551	7.30664e-75	WTu	KOu	WTu-KOu
Atg4a	CTB	-0.423525	0	-0.406966	0	WTd	KOd	WTd-KOd
Atg4a	EVT	0.605994	0	0.506564	3.41344e-77	WTu	KOu	WTu-KOu
Atg4c	CTB	-0.321828	0	-0.328219	0	WTd	KOd	WTd-KOd
Atg4c	STB	0.308757	6.61296e-170	0.318009	2.58243e-179	WTu	KOu	WTu-KOu
Atg4c	EVT	0.438031	2.1793e-237	0.829155	1.07594e-225	WTu	KOu	WTu-KOu
Atg5	EVT	0.303117	3.30232e-146	0.321365	1.8205e-60	WTu	KOu	WTu-KOu
Atg7	CTB	-0.465154	0	-0.466124	0	WTd	KOd	WTd-KOd
Atg7	STB	0.401872	1.22581e-188	0.393309	4.76761e-222	WTu	KOu	WTu-KOu
Atg7	EVT	0.472301	1.25846e-226	0.765958	7.95584e-174	WTu	KOu	WTu-KOu
Atg7	Stromal	0.481649	7.30258e-22	0.478642	2.691e-131	WTu	KOu	WTu-KOu
Atm	CTB	-0.335334	1.81186e-284	-0.299568	1.03252e-292	WTd	KOd	WTd-KOd
Atm	Stromal	0.324556	1.01747e-26	0.399855	1.3862e-115	WTu	KOu	WTu-KOu
Atox1	CTB	0.321113	2.93324e-24	0.336575	4.02755e-21	WTu	KOu	WTu-KOu
Atox1	STB	-0.398435	0.000326304	-0.32435	1.87649e-21	WTd	KOd	WTd-KOd
Atp10a	CTB	-0.627959	0	-0.598928	0	WTd	KOd	WTd-KOd
Atp10d	Stromal	0.463747	6.32901e-32	0.49741	4.51462e-140	WTu	KOu	WTu-KOu
Atp10d	Vascular	0.663575	4.49812e-86	0.414032	1.39308e-83	WTu	KOu	WTu-KOu
Atp10d	CTB	-0.316516	3.37343e-209	-0.344555	5.82961e-275	WTd	KOd	WTd-KOd
Atp11a	CTB	-0.477264	2.47942e-294	-0.399621	3.78969e-219	WTd	KOd	WTd-KOd
Atp11a	STB	0.298477	4.1726e-97	0.70518	2.21454e-182	WTu	KOu	WTu-KOu
Atp11a	EVT	0.89012	1.08483e-254	1.09623	1.04527e-86	WTu	KOu	WTu-KOu
Atp11b	STB	0.405171	1.76394e-173	0.527944	1.37649e-269	WTu	KOu	WTu-KOu
Atp11b	EVT	0.515497	3.31417e-237	0.458409	5.32641e-67	WTu	KOu	WTu-KOu
Atp11b	CTB	-0.449461	0	-0.424307	0	WTd	KOd	WTd-KOd
Atp11c	Vascular	0.870655	3.24012e-155	0.913394	0	WTu	KOu	WTu-KOu
Atp11c	CTB	-0.446025	0	-0.464098	0	WTd	KOd	WTd-KOd
Atp11c	Stromal	0.666877	1.17585e-91	0.389121	5.42863e-108	WTu	KOu	WTu-KOu
Atp13a3	EVT	0.769872	3.95247e-159	1.6965	1.92031e-142	WTu	KOu	WTu-KOu
Atp13a3	CTB	-0.501692	3.69054e-288	-0.512445	2.15038e-270	WTd	KOd	WTd-KOd
Atp2b1	CTB	-0.852669	1.77682e-241	-0.808296	2.16788e-184	WTd	KOd	WTd-KOd
Atp2b1	STB	1.57333	2.1879e-185	0.344898	5.54376e-61	WTu	KOu	WTu-KOu
Atp2b1	Stromal	0.262205	8.92314e-13	1.36934	1.37364e-83	WTu	KOu	WTu-KOu
Atp2b4	CTB	-0.374159	1.84592e-228	-0.308145	7.07569e-178	WTd	KOd	WTd-KOd
Atp2b4	Vascular	0.333565	8.47583e-19	0.428786	1.22574e-61	WTu	KOu	WTu-KOu
Atp2c1	EVT	0.856155	0	0.376678	2.95246e-35	WTu	KOu	WTu-KOu
Atp2c1	CTB	-0.495589	0	-0.474843	0	WTd	KOd	WTd-KOd
Atp5a1	CTB	0.483256	3.55683e-23	0.465123	2.3125e-07	WTu	KOu	WTu-KOu
Atp5a1	STB	-0.439596	4.56174e-10	-0.417756	1.45457e-08	WTd	KOd	WTd-KOd
Atp5b	CTB	0.426541	8.10507e-34	0.456472	5.75567e-07	WTu	KOu	WTu-KOu
Atp5b	STB	-0.374617	1.58429e-13	-0.425299	1.44767e-06	WTd	KOd	WTd-KOd
Atp5d	EVT	-0.276163	5.53977e-11	-0.301792	0.000245719	WTd	KOd	WTd-KOd
Atp5d	STB	-0.311394	1.1043e-08	-0.454888	0.00164166	WTd	KOd	WTd-KOd
Atp5d	CTB	0.299944	4.68169e-26	0.400794	5.2728e-10	WTu	KOu	WTu-KOu
Atp5e	CTB	0.373473	1.27021e-19	0.47585	1.10309e-05	WTu	KOu	WTu-KOu
Atp5g1	CTB	0.312721	3.79245e-14	0.33744	3.38548e-11	WTu	KOu	WTu-KOu
Atp5g3	STB	-0.462859	0.000108827	-0.513965	2.06694e-05	WTd	KOd	WTd-KOd
Atp5g3	CTB	0.463957	4.11653e-12	0.529995	0.00349428	WTu	KOu	WTu-KOu
Atp5h	STB	-0.259574	5.81934e-09	-0.296175	3.87271e-08	WTd	KOd	WTd-KOd
Atp5h	CTB	0.257982	5.41901e-21	0.33706	3.10237e-12	WTu	KOu	WTu-KOu
Atp5j	STB	-0.349183	3.25119e-08	-0.341002	3.31616e-06	WTd	KOd	WTd-KOd
Atp5j	CTB	0.335608	4.03391e-20	0.298106	1.12908e-19	WTu	KOu	WTu-KOu
Atp5j	EVT	-0.344645	0.0154443	-0.316079	0.00799363	WTd	KOd	WTd-KOd
Atp5j2	CTB	0.273343	1.63679e-47	0.424996	5.26838e-14	WTu	KOu	WTu-KOu
Atp5j2	STB	-0.346742	6.262e-13	-0.417836	2.19904e-12	WTd	KOd	WTd-KOd
Atp5k	CTB	0.47437	4.8269e-12	0.461899	6.27853e-05	WTu	KOu	WTu-KOu
Atp5md	CTB	0.343064	2.46842e-20	0.353459	1.22373e-13	WTu	KOu	WTu-KOu
Atp5md	STB	-0.35483	3.03314e-06	-0.301838	2.73533e-13	WTd	KOd	WTd-KOd
Atp5o	CTB	-0.406837	0	-0.369891	0	WTd	KOd	WTd-KOd
Atp5o	EVT	0.390248	1.74627e-253	0.837073	0	WTu	KOu	WTu-KOu
Atp5pb	CTB	0.263182	1.26832e-56	0.319147	7.09987e-28	WTu	KOu	WTu-KOu
Atp6ap1	CTB	0.252365	2.90756e-37	0.324146	6.9265e-18	WTu	KOu	WTu-KOu
Atp6ap1	EVT	-0.26648	3.86266e-12	-0.253157	7.94798e-07	WTd	KOd	WTd-KOd
Atp6v0a1	Vascular	0.453491	8.65638e-36	0.373054	2.19755e-53	WTu	KOu	WTu-KOu
Atp6v0a1	CTB	-0.440696	0	-0.51525	1.10298e-300	WTd	KOd	WTd-KOd
Atp6v0a1	EVT	0.486096	8.33783e-96	1.69546	2.76429e-239	WTu	KOu	WTu-KOu
Atp6v0b	EVT	0.49498	2.52566e-180	0.928558	2.57259e-108	WTu	KOu	WTu-KOu
Atp6v0c	CTB	0.456645	5.56401e-15	0.481586	2.02422e-07	WTu	KOu	WTu-KOu
Atp6v0e	CTB	0.298519	3.24305e-46	0.322781	5.64167e-33	WTu	KOu	WTu-KOu
Atp6v1f	STB	-0.26965	8.83222e-08	-0.330467	0.000425014	WTd	KOd	WTd-KOd
Atp6v1f	CTB	0.2989	2.18232e-14	0.332681	7.30801e-05	WTu	KOu	WTu-KOu
Atp6v1g1	STB	-0.393927	9.71216e-07	-0.35396	4.04511e-10	WTd	KOd	WTd-KOd
Atp6v1g1	CTB	0.376641	8.40541e-21	0.453272	1.04809e-05	WTu	KOu	WTu-KOu
Atp6v1h	STB	0.67808	1.90478e-267	0.250719	3.78347e-137	WTu	KOu	WTu-KOu
Atp6v1h	CTB	-0.496134	0	-0.497345	0	WTd	KOd	WTd-KOd
Atp6v1h	EVT	0.331739	1.66993e-175	0.553041	1.41783e-77	WTu	KOu	WTu-KOu
Atp7a	Stromal	0.980607	1.71769e-111	0.372394	1.45667e-59	WTu	KOu	WTu-KOu
Atp7a	CTB	-0.733134	0	-0.838861	0	WTd	KOd	WTd-KOd
Atp7a	Vascular	1.95475	0	1.76428	0	WTu	KOu	WTu-KOu
Atp8a1	Stromal	0.531445	1.27487e-18	0.9058	1.82541e-158	WTu	KOu	WTu-KOu
Atp8a1	STB	0.431944	8.64091e-106	0.65429	1.20296e-207	WTu	KOu	WTu-KOu
Atp8a1	CTB	-0.676956	0	-0.779004	0	WTd	KOd	WTd-KOd
Atp8a1	Vascular	1.06609	6.08973e-128	0.622645	4.15824e-101	WTu	KOu	WTu-KOu
Atp8b1	CTB	-1.37094	0	-1.1805	1.10431e-244	WTd	KOd	WTd-KOd
Atp9b	STB	0.73806	0	0.71357	0	WTu	KOu	WTu-KOu
Atp9b	EVT	0.892569	0	0.987356	3.32421e-134	WTu	KOu	WTu-KOu
Atp9b	Vascular	0.445464	6.43265e-36	0.619757	2.75359e-95	WTu	KOu	WTu-KOu
Atp9b	Stromal	0.449547	3.25783e-35	0.67554	7.17804e-171	WTu	KOu	WTu-KOu
Atp9b	CTB	-0.837741	0	-0.8163	0	WTd	KOd	WTd-KOd
Atr	Vascular	0.34748	2.3234e-08	0.295872	4.08673e-24	WTu	KOu	WTu-KOu
Atr	Stromal	0.361802	5.65257e-34	0.367644	8.79849e-95	WTu	KOu	WTu-KOu
Atr	CTB	-0.368981	0	-0.376993	0	WTd	KOd	WTd-KOd
Atr	STB	0.292423	1.71796e-164	0.362577	3.71186e-255	WTu	KOu	WTu-KOu
Atrn	CTB	-0.508427	0	-0.505131	0	WTd	KOd	WTd-KOd
Atrn	Stromal	0.519769	6.58258e-32	0.353547	1.50279e-73	WTu	KOu	WTu-KOu
Atrn	EVT	0.351583	1.1647e-165	0.405086	1.47987e-53	WTu	KOu	WTu-KOu
Atrn	Vascular	0.45993	2.7626e-31	0.369877	7.33556e-51	WTu	KOu	WTu-KOu
Atrn	STB	0.49071	1.61683e-213	0.612145	4.98075e-267	WTu	KOu	WTu-KOu
Atrnl1	Vascular	0.873799	5.16331e-93	1.2942	6.79592e-237	WTu	KOu	WTu-KOu
Atrnl1	EVT	1.56224	0	2.76324	5.71272e-283	WTu	KOu	WTu-KOu
Atrnl1	Stromal	1.68836	2.61466e-116	1.4293	0	WTu	KOu	WTu-KOu
Atrnl1	CTB	-1.75569	0	-1.77274	0	WTd	KOd	WTd-KOd
Atrnl1	STB	1.32142	0	0.762569	1.8045e-162	WTu	KOu	WTu-KOu
Atrx	CTB	-1.05717	0	-1.03084	0	WTd	KOd	WTd-KOd
Atrx	Stromal	1.01152	9.59589e-104	0.65214	5.77107e-144	WTu	KOu	WTu-KOu
Atrx	STB	0.781302	0	1.17442	0	WTu	KOu	WTu-KOu
Atrx	Vascular	0.958096	1.3181e-92	1.11138	3.2838e-226	WTu	KOu	WTu-KOu
Atxn1	CTB	-1.39342	0	-1.51427	0	WTd	KOd	WTd-KOd
Atxn1	STB	1.22402	0	0.352216	1.55733e-101	WTu	KOu	WTu-KOu
Atxn1	Stromal	1.94354	8.56781e-303	1.41913	0	WTu	KOu	WTu-KOu
Atxn1	Vascular	1.61818	2.52512e-245	2.07445	0	WTu	KOu	WTu-KOu
Atxn10	EVT	0.936785	2.92713e-177	1.30223	1.4485e-76	WTu	KOu	WTu-KOu
Atxn10	CTB	-0.336747	4.76483e-108	-0.274081	3.26097e-71	WTd	KOd	WTd-KOd
Atxn2	EVT	1.15157	0	2.08083	5.29383e-246	WTu	KOu	WTu-KOu
Atxn2	STB	0.55726	3.85988e-232	0.498369	2.50046e-217	WTu	KOu	WTu-KOu
Atxn2	Vascular	0.263428	8.21531e-19	0.680171	1.81988e-139	WTu	KOu	WTu-KOu
Atxn2	CTB	-0.845206	0	-0.963006	0	WTd	KOd	WTd-KOd
Atxn2	Stromal	0.269422	1.65475e-23	0.597784	3.33671e-160	WTu	KOu	WTu-KOu
Atxn2l	EVT	0.257273	2.86626e-126	0.297195	1.58963e-53	WTu	KOu	WTu-KOu
Atxn3	Vascular	0.390191	2.7816e-39	0.273039	3.36242e-51	WTu	KOu	WTu-KOu
Atxn7	STB	0.70749	0	0.581451	1.67517e-300	WTu	KOu	WTu-KOu
Atxn7	Stromal	0.602884	6.11385e-44	0.649782	5.09088e-195	WTu	KOu	WTu-KOu
Atxn7	Vascular	0.66728	9.86156e-52	0.520148	2.27423e-80	WTu	KOu	WTu-KOu
Atxn7	EVT	0.616009	3.96116e-291	0.903323	1.80817e-137	WTu	KOu	WTu-KOu
Atxn7	CTB	-0.76006	0	-0.719386	0	WTd	KOd	WTd-KOd
Atxn7l1	Stromal	0.938656	6.89729e-100	1.62247	0	WTu	KOu	WTu-KOu
Atxn7l1	EVT	0.4854	1.24952e-233	0.528824	1.43995e-76	WTu	KOu	WTu-KOu
Atxn7l1	STB	1.41761	0	0.694598	0	WTu	KOu	WTu-KOu
Atxn7l1	CTB	-1.14353	0	-1.25841	0	WTd	KOd	WTd-KOd
Atxn7l1	Vascular	0.740036	2.12549e-56	0.719984	7.47505e-128	WTu	KOu	WTu-KOu
AU020206	Vascular	0.358612	3.05955e-22	0.286215	2.99839e-53	WTu	KOu	WTu-KOu
Auh	Vascular	0.432856	2.85146e-34	0.314108	4.74481e-65	WTu	KOu	WTu-KOu
Auh	Stromal	0.446667	3.87953e-30	0.341309	1.05083e-87	WTu	KOu	WTu-KOu
Auts2	EVT	1.67409	0	1.14053	7.78777e-164	WTu	KOu	WTu-KOu
Auts2	CTB	-1.84336	0	-1.81133	0	WTd	KOd	WTd-KOd
Auts2	STB	0.527733	1.30401e-131	1.79361	0	WTu	KOu	WTu-KOu
Aven	Stromal	0.326183	4.96082e-29	0.279706	1.24476e-62	WTu	KOu	WTu-KOu
Avl9	CTB	-0.306707	0	-0.308609	0	WTd	KOd	WTd-KOd
Avl9	Vascular	0.287587	4.27802e-12	0.317013	5.8266e-51	WTu	KOu	WTu-KOu
AW554918	STB	0.697282	0	0.632638	0	WTu	KOu	WTu-KOu
AW554918	EVT	0.682396	0	0.506632	1.10374e-105	WTu	KOu	WTu-KOu
AW554918	Stromal	0.782619	1.15151e-107	0.715637	1.79551e-195	WTu	KOu	WTu-KOu
AW554918	CTB	-0.857217	0	-0.81344	0	WTd	KOd	WTd-KOd
AW554918	Vascular	0.891473	5.17444e-85	0.868352	2.76008e-162	WTu	KOu	WTu-KOu
AW822252	CTB	-0.332213	3.84988e-296	-0.280019	1.54485e-260	WTd	KOd	WTd-KOd
Axin1	CTB	-0.326223	0	-0.287672	1.42973e-296	WTd	KOd	WTd-KOd
Axin1	EVT	0.426516	1.82603e-202	0.404618	1.21709e-66	WTu	KOu	WTu-KOu
Axin1	STB	0.270441	1.01404e-117	0.311384	2.32063e-179	WTu	KOu	WTu-KOu
Axl	Stromal	0.464484	1.73689e-55	0.347567	3.06886e-82	WTu	KOu	WTu-KOu
Azi2	Stromal	0.262433	6.92234e-20	0.259732	8.91315e-64	WTu	KOu	WTu-KOu
B230307C23Rik	EVT	0.302651	4.39179e-166	0.348623	1.48006e-69	WTu	KOu	WTu-KOu
B230312C02Rik	EVT	0.604866	2.89332e-206	1.5154	0	WTu	KOu	WTu-KOu
B2m	EVT	-0.736479	0.00846937	-1.03665	1.35232e-06	WTd	KOd	WTd-KOd
B2m	CTB	0.656731	2.12861e-06	0.667293	4.5262e-31	WTu	KOu	WTu-KOu
B3gntl1	CTB	-0.317297	0	-0.287252	0	WTd	KOd	WTd-KOd
B3gntl1	STB	0.295091	2.65256e-177	0.341256	1.25418e-282	WTu	KOu	WTu-KOu
B430010I23Rik	EVT	0.402581	0	0.586947	6.64808e-226	WTu	KOu	WTu-KOu
B430010I23Rik	CTB	-0.263187	1.59439e-301	-0.294638	0	WTd	KOd	WTd-KOd
B4galt5	Stromal	0.301086	3.98015e-16	1.40735	0	WTu	KOu	WTu-KOu
B4galt5	Vascular	0.73786	1.29018e-58	0.598996	3.0864e-94	WTu	KOu	WTu-KOu
B4galt5	CTB	-0.760136	0	-0.823317	0	WTd	KOd	WTd-KOd
B830012L14Rik	CTB	-1.16549	0	-1.15954	0	WTd	KOd	WTd-KOd
B830012L14Rik	Vascular	2.57904	0	2.34918	0	WTu	KOu	WTu-KOu
B830012L14Rik	Stromal	1.09839	1.29068e-193	0.541798	8.7513e-80	WTu	KOu	WTu-KOu
Babam2	CTB	-1.11269	0	-1.07247	0	WTd	KOd	WTd-KOd
Babam2	Stromal	0.65976	3.24604e-54	1.19985	0	WTu	KOu	WTu-KOu
Babam2	EVT	0.899194	0	0.778343	2.71637e-117	WTu	KOu	WTu-KOu
Babam2	Vascular	0.578477	7.45857e-36	0.583304	6.97267e-84	WTu	KOu	WTu-KOu
Babam2	STB	1.20056	0	0.854841	0	WTu	KOu	WTu-KOu
Bach2	CTB	-1.15081	0	-1.20251	0	WTd	KOd	WTd-KOd
Bach2	Stromal	1.2692	5.24694e-56	0.591603	1.37115e-32	WTu	KOu	WTu-KOu
Bach2	Vascular	2.08458	0	1.72166	0	WTu	KOu	WTu-KOu
Bach2	STB	0.345909	1.03765e-111	1.0906	0	WTu	KOu	WTu-KOu
Baiap2l1	EVT	0.717474	3.71672e-282	1.56014	0	WTu	KOu	WTu-KOu
Baiap2l1	CTB	-0.617278	0	-0.741586	0	WTd	KOd	WTd-KOd
Batf3	EVT	0.265251	6.86406e-117	0.885987	0	WTu	KOu	WTu-KOu
Baz1a	Stromal	0.729459	4.96947e-56	0.762662	1.46808e-178	WTu	KOu	WTu-KOu
Baz1a	CTB	-0.395951	0	-0.451234	0	WTd	KOd	WTd-KOd
Baz1b	STB	0.376726	2.45268e-151	0.580381	1.62721e-236	WTu	KOu	WTu-KOu
Baz1b	CTB	-0.451676	0	-0.447723	0	WTd	KOd	WTd-KOd
Baz1b	Stromal	0.442593	5.94895e-31	0.31463	1.25005e-65	WTu	KOu	WTu-KOu
Baz1b	Vascular	0.37711	2.22084e-21	0.435627	2.19702e-63	WTu	KOu	WTu-KOu
Baz2a	STB	0.436271	1.36136e-158	0.676944	8.00035e-236	WTu	KOu	WTu-KOu
Baz2a	CTB	-0.43551	0	-0.472012	0	WTd	KOd	WTd-KOd
Baz2a	EVT	0.498606	8.485e-203	0.579135	2.25945e-71	WTu	KOu	WTu-KOu
Baz2b	CTB	-1.35304	0	-1.33609	0	WTd	KOd	WTd-KOd
Baz2b	EVT	0.710417	3.41519e-294	0.385547	5.60091e-66	WTu	KOu	WTu-KOu
Baz2b	Stromal	1.5233	1.50288e-197	1.22838	0	WTu	KOu	WTu-KOu
Baz2b	STB	1.05639	0	0.78478	0	WTu	KOu	WTu-KOu
Baz2b	Vascular	1.61912	1.08447e-222	1.5874	0	WTu	KOu	WTu-KOu
Bbs9	STB	0.534238	1.77237e-242	0.571904	0	WTu	KOu	WTu-KOu
Bbs9	Stromal	0.667203	2.61319e-95	0.427434	1.04659e-79	WTu	KOu	WTu-KOu
Bbs9	EVT	0.515131	0	0.430444	4.0908e-132	WTu	KOu	WTu-KOu
Bbs9	Vascular	0.354235	1.40519e-10	0.573253	9.37339e-87	WTu	KOu	WTu-KOu
Bbs9	CTB	-0.60677	0	-0.576951	0	WTd	KOd	WTd-KOd
Bbx	EVT	1.20087	4.78663e-163	2.24027	4.08503e-136	WTu	KOu	WTu-KOu
Bbx	STB	0.459587	2.71131e-52	1.02512	1.09047e-138	WTu	KOu	WTu-KOu
Bbx	CTB	-0.751389	6.96387e-204	-0.829692	3.36817e-202	WTd	KOd	WTd-KOd
BC005537	Stromal	0.379955	3.92896e-24	0.372371	1.67547e-72	WTu	KOu	WTu-KOu
BC028528	Vascular	0.44268	2.55686e-131	0.351812	1.34475e-155	WTu	KOu	WTu-KOu
BC065397	CTB	-0.269271	0	-0.258696	0	WTd	KOd	WTd-KOd
BC065397	EVT	0.388022	7.0088e-290	0.318069	1.81783e-112	WTu	KOu	WTu-KOu
Bcap31	CTB	0.396121	7.18654e-30	0.417666	3.19774e-12	WTu	KOu	WTu-KOu
Bcap31	STB	-0.34879	6.22651e-14	-0.414927	4.73337e-08	WTd	KOd	WTd-KOd
Bcar1	EVT	0.273797	4.46786e-124	0.390113	1.45413e-70	WTu	KOu	WTu-KOu
Bcar3	STB	0.837696	5.7024e-149	1.35546	0	WTu	KOu	WTu-KOu
Bcar3	CTB	-0.819871	0	-0.855045	0	WTd	KOd	WTd-KOd
Bcas3	CTB	-1.46448	0	-1.50914	0	WTd	KOd	WTd-KOd
Bcas3	Stromal	1.12922	6.37843e-120	0.91732	6.7159e-256	WTu	KOu	WTu-KOu
Bcas3	Vascular	1.1191	8.96655e-99	1.2645	9.30863e-270	WTu	KOu	WTu-KOu
Bcas3	STB	0.857609	0	1.51657	0	WTu	KOu	WTu-KOu
Bcas3	EVT	1.56104	0	1.50138	4.17096e-205	WTu	KOu	WTu-KOu
Bcat1	CTB	-0.337665	4.0281e-203	-0.366249	1.22587e-162	WTd	KOd	WTd-KOd
Bckdhb	EVT	0.480523	1.58328e-295	0.775629	3.7476e-203	WTu	KOu	WTu-KOu
Bckdhb	CTB	-0.326671	0	-0.390556	0	WTd	KOd	WTd-KOd
Bcl2	Vascular	0.655632	6.72715e-95	0.949426	2.38686e-302	WTu	KOu	WTu-KOu
Bcl2	CTB	-0.53526	1.63958e-299	-0.450318	0	WTd	KOd	WTd-KOd
Bcl2	Stromal	1.54176	3.44862e-289	0.369067	3.66381e-83	WTu	KOu	WTu-KOu
Bcl2l1	EVT	0.478455	3.44067e-127	0.586643	3.29344e-57	WTu	KOu	WTu-KOu
Bcl2l1	CTB	-0.508878	0	-0.300816	3.25388e-215	WTd	KOd	WTd-KOd
Bcl9	Stromal	0.340577	5.12605e-31	0.409592	8.07922e-78	WTu	KOu	WTu-KOu
Bcl9	CTB	-0.302455	1.4581e-219	-0.287375	1.2732e-204	WTd	KOd	WTd-KOd
Bclaf1	Vascular	0.433507	4.55245e-37	0.539707	8.85603e-88	WTu	KOu	WTu-KOu
Bclaf1	EVT	0.728537	3.41962e-288	0.51412	1.14009e-58	WTu	KOu	WTu-KOu
Bclaf1	STB	0.856101	0	0.696387	1.86826e-256	WTu	KOu	WTu-KOu
Bclaf1	Stromal	0.55534	8.44179e-49	0.658573	4.05228e-157	WTu	KOu	WTu-KOu
Bclaf1	CTB	-0.831665	0	-0.719039	0	WTd	KOd	WTd-KOd
Bclaf3	CTB	-0.670478	2.36074e-287	-0.767933	0	WTd	KOd	WTd-KOd
Bclaf3	EVT	1.32673	0	2.19541	8.16911e-236	WTu	KOu	WTu-KOu
Bclaf3	STB	0.252654	1.25004e-47	1.15257	0	WTu	KOu	WTu-KOu
Bcor	CTB	-0.507315	0	-0.472083	0	WTd	KOd	WTd-KOd
Bcor	Vascular	0.655472	1.95516e-48	0.544491	1.68569e-66	WTu	KOu	WTu-KOu
Bcor	STB	0.296372	2.66217e-86	0.309526	3.2465e-103	WTu	KOu	WTu-KOu
Bcor	EVT	0.576575	4.96719e-247	0.812262	1.01009e-140	WTu	KOu	WTu-KOu
Bcr	CTB	-0.318378	2.31799e-275	-0.29453	1.42161e-259	WTd	KOd	WTd-KOd
Bcr	EVT	0.371444	6.79108e-158	0.403327	1.04824e-67	WTu	KOu	WTu-KOu
Bdkrb2	CTB	-0.398779	4.92865e-207	-0.310255	2.01367e-142	WTd	KOd	WTd-KOd
Bdp1	EVT	0.766974	0	0.986566	2.8702e-156	WTu	KOu	WTu-KOu
Bdp1	Stromal	0.266243	4.10828e-19	0.313406	6.35419e-60	WTu	KOu	WTu-KOu
Bdp1	STB	0.469721	6.42998e-196	0.754499	0	WTu	KOu	WTu-KOu
Bdp1	CTB	-0.60562	0	-0.624652	0	WTd	KOd	WTd-KOd
Bend7	EVT	0.833087	0	0.425893	2.95076e-117	WTu	KOu	WTu-KOu
Bend7	CTB	-0.374809	9.77616e-276	-0.307582	3.29392e-235	WTd	KOd	WTd-KOd
Bex1	CTB	0.402947	2.76009e-16	0.333569	7.89434e-19	WTu	KOu	WTu-KOu
Bex3	CTB	0.324074	3.96384e-22	0.429676	1.51402e-08	WTu	KOu	WTu-KOu
Bex3	STB	-0.353389	2.50579e-07	-0.291935	5.77496e-18	WTd	KOd	WTd-KOd
Bhlhe41	CTB	0.284723	9.08421e-25	0.321771	2.51919e-16	WTu	KOu	WTu-KOu
Bicc1	CTB	-0.493345	0	-0.427774	2.80802e-254	WTd	KOd	WTd-KOd
Bicc1	Stromal	0.852565	2.18881e-70	0.480273	1.28036e-144	WTu	KOu	WTu-KOu
Bicdl1	EVT	1.08724	0	1.82074	0	WTu	KOu	WTu-KOu
Bicdl1	CTB	-0.422247	3.36111e-222	-0.392467	2.14112e-190	WTd	KOd	WTd-KOd
Bicra	Vascular	0.789002	1.53303e-90	0.656544	2.91253e-146	WTu	KOu	WTu-KOu
Bicra	Stromal	0.627457	2.48581e-70	0.572343	2.05028e-165	WTu	KOu	WTu-KOu
Bicra	STB	0.50934	8.97849e-257	0.453114	8.98861e-264	WTu	KOu	WTu-KOu
Bicra	EVT	0.435325	2.9966e-243	0.522228	2.71076e-114	WTu	KOu	WTu-KOu
Bicra	CTB	-0.627846	0	-0.629042	0	WTd	KOd	WTd-KOd
Bicral	STB	0.530228	1.80117e-277	0.519146	5.30641e-287	WTu	KOu	WTu-KOu
Bicral	CTB	-0.512899	0	-0.457115	0	WTd	KOd	WTd-KOd
Bicral	Stromal	0.476803	3.91681e-31	0.402708	1.17151e-95	WTu	KOu	WTu-KOu
Birc2	EVT	0.293711	2.0526e-160	0.515274	3.87682e-108	WTu	KOu	WTu-KOu
Birc3	CTB	-0.307284	2.86678e-272	-0.278109	1.28232e-246	WTd	KOd	WTd-KOd
Birc6	Stromal	0.738571	6.74408e-61	0.754918	8.34456e-160	WTu	KOu	WTu-KOu
Birc6	STB	0.892994	0	1.18343	0	WTu	KOu	WTu-KOu
Birc6	EVT	1.20075	0	1.12952	5.588e-95	WTu	KOu	WTu-KOu
Birc6	Vascular	0.806802	8.53576e-63	0.945021	4.97178e-158	WTu	KOu	WTu-KOu
Birc6	CTB	-1.15887	0	-1.14526	0	WTd	KOd	WTd-KOd
Bmp2k	EVT	0.369358	4.58992e-142	0.307992	2.5834e-57	WTu	KOu	WTu-KOu
Bmp2k	CTB	-0.485724	0	-0.452793	0	WTd	KOd	WTd-KOd
Bmp2k	Stromal	0.551864	2.51797e-30	0.590561	6.95754e-141	WTu	KOu	WTu-KOu
Bmp2k	STB	0.509272	9.6915e-179	0.260726	6.76424e-100	WTu	KOu	WTu-KOu
Bmp6	CTB	-0.806657	1.07145e-290	-0.899762	0	WTd	KOd	WTd-KOd
Bmp6	Vascular	2.61909	0	2.17393	0	WTu	KOu	WTu-KOu
Bmper	Stromal	0.28572	4.56843e-16	0.696646	1.74569e-42	WTu	KOu	WTu-KOu
Bmper	EVT	0.539489	1.87879e-117	1.44758	0	WTu	KOu	WTu-KOu
Bmper	CTB	-0.535719	6.80351e-172	-0.569422	6.91907e-230	WTd	KOd	WTd-KOd
Bmpr1a	STB	0.667739	2.96231e-258	0.557739	4.07851e-208	WTu	KOu	WTu-KOu
Bmpr1a	EVT	0.292063	1.08617e-133	0.587635	1.90778e-91	WTu	KOu	WTu-KOu
Bmpr1a	CTB	-0.399793	0	-0.456629	0	WTd	KOd	WTd-KOd
Bmpr2	Vascular	1.01663	5.21669e-76	0.768287	2.1548e-78	WTu	KOu	WTu-KOu
Bmpr2	CTB	-0.473024	1.35345e-292	-0.449961	4.3863e-223	WTd	KOd	WTd-KOd
Bmt2	Vascular	0.328279	5.0215e-16	0.432937	1.62436e-69	WTu	KOu	WTu-KOu
Bmt2	CTB	-0.366058	0	-0.366474	0	WTd	KOd	WTd-KOd
Bmt2	Stromal	0.532025	1.03215e-49	0.362514	8.82347e-86	WTu	KOu	WTu-KOu
Bnip3l	CTB	0.273002	1.91762e-70	0.253412	3.16729e-49	WTu	KOu	WTu-KOu
Bod1l	EVT	0.257952	2.73486e-129	0.576753	9.22004e-62	WTu	KOu	WTu-KOu
Bod1l	STB	0.25264	2.26601e-102	0.4572	9.81021e-184	WTu	KOu	WTu-KOu
Bptf	CTB	-0.700988	0	-0.624502	0	WTd	KOd	WTd-KOd
Bptf	STB	0.369843	3.99586e-156	0.61641	4.50912e-224	WTu	KOu	WTu-KOu
Bptf	Vascular	0.35086	2.77847e-21	0.453054	4.8634e-62	WTu	KOu	WTu-KOu
Bptf	EVT	0.907246	0	0.998242	6.09378e-111	WTu	KOu	WTu-KOu
Bptf	Stromal	0.54961	1.21687e-36	0.38843	2.71796e-83	WTu	KOu	WTu-KOu
Braf	STB	0.278749	9.7436e-109	1.66195	0	WTu	KOu	WTu-KOu
Braf	CTB	-0.986783	0	-1.01902	0	WTd	KOd	WTd-KOd
Braf	Vascular	0.467085	9.09729e-28	0.415532	2.63223e-57	WTu	KOu	WTu-KOu
Braf	EVT	1.52374	0	0.716405	6.93024e-75	WTu	KOu	WTu-KOu
Brd1	EVT	0.698335	1.77385e-276	0.576391	1.86385e-63	WTu	KOu	WTu-KOu
Brd1	CTB	-0.471753	0	-0.448101	0	WTd	KOd	WTd-KOd
Brd1	STB	0.3487	2.78275e-123	0.748234	2.06744e-270	WTu	KOu	WTu-KOu
Brd4	STB	0.593649	8.25117e-204	0.82201	1.35286e-270	WTu	KOu	WTu-KOu
Brd4	Vascular	0.482471	1.51694e-28	0.524717	1.27912e-69	WTu	KOu	WTu-KOu
Brd4	Stromal	0.449878	1.23807e-34	0.564748	2.1028e-112	WTu	KOu	WTu-KOu
Brd4	EVT	0.661752	2.57363e-240	0.783253	1.00491e-71	WTu	KOu	WTu-KOu
Brd4	CTB	-0.674229	0	-0.75873	0	WTd	KOd	WTd-KOd
Brd8	Stromal	0.271519	1.92934e-16	0.263104	7.03752e-48	WTu	KOu	WTu-KOu
Brd8	Vascular	0.344739	1.34047e-19	0.356683	3.63436e-50	WTu	KOu	WTu-KOu
Brd8	STB	0.424905	2.68801e-192	0.636759	0	WTu	KOu	WTu-KOu
Brd8	EVT	0.612699	1.44899e-294	0.546841	2.74547e-80	WTu	KOu	WTu-KOu
Brd8	CTB	-0.531547	0	-0.494474	0	WTd	KOd	WTd-KOd
Brd9	EVT	0.278904	1.64356e-140	0.428147	8.71355e-102	WTu	KOu	WTu-KOu
Brd9	CTB	-0.402928	0	-0.329861	0	WTd	KOd	WTd-KOd
Brd9	Stromal	0.327515	1.69767e-24	0.376548	2.10914e-85	WTu	KOu	WTu-KOu
Brf1	Vascular	0.366911	7.74695e-20	0.406304	2.01646e-56	WTu	KOu	WTu-KOu
Brf1	CTB	-0.425406	0	-0.469228	0	WTd	KOd	WTd-KOd
Brf1	EVT	0.437507	1.0378e-241	0.575984	7.36138e-139	WTu	KOu	WTu-KOu
Brf1	STB	0.359847	3.71595e-154	0.436188	6.01655e-273	WTu	KOu	WTu-KOu
Brip1os	STB	0.403953	6.48973e-144	0.360028	1.04898e-191	WTu	KOu	WTu-KOu
Brip1os	EVT	0.364046	1.1692e-172	0.282052	1.23454e-57	WTu	KOu	WTu-KOu
Brip1os	Stromal	0.496087	4.12092e-39	0.350676	1.15688e-56	WTu	KOu	WTu-KOu
Brip1os	Vascular	0.580071	1.78174e-48	0.487406	9.84787e-82	WTu	KOu	WTu-KOu
Brip1os	CTB	-0.492733	0	-0.428866	0	WTd	KOd	WTd-KOd
Brms1l	STB	0.299411	9.58044e-133	0.383862	1.30884e-176	WTu	KOu	WTu-KOu
Brms1l	CTB	-0.26374	6.41145e-262	-0.250413	2.64207e-251	WTd	KOd	WTd-KOd
Brpf3	EVT	0.813727	0	0.760561	1.59428e-155	WTu	KOu	WTu-KOu
Brpf3	CTB	-0.451927	0	-0.395561	0	WTd	KOd	WTd-KOd
Brwd1	CTB	-1.02395	0	-0.976605	0	WTd	KOd	WTd-KOd
Brwd1	Stromal	0.565261	1.00012e-40	0.910184	4.06172e-211	WTu	KOu	WTu-KOu
Brwd1	EVT	0.851162	0	0.347152	1.08088e-46	WTu	KOu	WTu-KOu
Brwd1	Vascular	0.328026	2.1303e-19	0.451112	2.0015e-60	WTu	KOu	WTu-KOu
Brwd1	STB	1.16268	0	1.15016	0	WTu	KOu	WTu-KOu
Bsg	STB	-0.823529	0.00013813	-1.01318	1.02612e-27	WTd	KOd	WTd-KOd
Bsg	Vascular	-0.729183	0.03428	-0.65065	2.28093e-09	WTd	KOd	WTd-KOd
Bsg	CTB	0.853805	3.18371e-21	0.839796	3.69972e-71	WTu	KOu	WTu-KOu
Btaf1	Stromal	0.417147	3.91808e-32	0.887604	8.33528e-246	WTu	KOu	WTu-KOu
Btaf1	STB	0.713299	0	0.817899	0	WTu	KOu	WTu-KOu
Btaf1	EVT	0.815312	0	1.51273	2.50943e-176	WTu	KOu	WTu-KOu
Btaf1	Vascular	0.252244	4.0189e-18	0.623188	8.61839e-87	WTu	KOu	WTu-KOu
Btaf1	CTB	-0.759182	0	-1.03558	0	WTd	KOd	WTd-KOd
Btbd1	CTB	-0.47743	0	-0.511497	0	WTd	KOd	WTd-KOd
Btbd1	Stromal	0.401597	1.53443e-31	0.537029	1.74432e-160	WTu	KOu	WTu-KOu
Btbd1	Vascular	0.592848	3.83349e-45	0.610488	2.89531e-114	WTu	KOu	WTu-KOu
Btbd1	STB	0.492043	2.15089e-263	0.299135	8.90943e-174	WTu	KOu	WTu-KOu
Btbd10	CTB	-0.342255	0	-0.377054	0	WTd	KOd	WTd-KOd
Btbd10	STB	0.292566	3.07656e-128	0.348764	3.32077e-200	WTu	KOu	WTu-KOu
Btbd10	EVT	0.412875	4.4518e-190	0.79012	5.88086e-163	WTu	KOu	WTu-KOu
Btbd11	CTB	-0.60739	0	-0.456228	2.41073e-239	WTd	KOd	WTd-KOd
Btbd3	Vascular	0.415556	5.19299e-32	0.369472	2.14229e-47	WTu	KOu	WTu-KOu
Btbd3	STB	0.501798	1.44747e-162	-0.403412	1.50709e-05	WTu	KOd	WTu-KOd
Btbd7	Vascular	0.844269	2.84041e-66	0.720697	4.26171e-116	WTu	KOu	WTu-KOu
Btbd7	Stromal	0.532067	2.90202e-35	0.517688	4.15487e-116	WTu	KOu	WTu-KOu
Btbd7	STB	0.633724	3.21938e-242	0.612694	2.87636e-241	WTu	KOu	WTu-KOu
Btbd7	EVT	0.560406	4.66208e-221	0.996828	3.76238e-115	WTu	KOu	WTu-KOu
Btbd7	CTB	-0.723604	0	-0.746018	0	WTd	KOd	WTd-KOd
Btbd9	EVT	0.669557	0	0.915242	2.6117e-161	WTu	KOu	WTu-KOu
Btbd9	STB	0.860741	0	0.789836	0	WTu	KOu	WTu-KOu
Btbd9	Vascular	0.688193	2.24345e-61	0.706747	4.96348e-121	WTu	KOu	WTu-KOu
Btbd9	CTB	-0.842383	0	-0.928315	0	WTd	KOd	WTd-KOd
Btbd9	Stromal	0.528413	2.17186e-32	0.842462	2.50799e-228	WTu	KOu	WTu-KOu
Btrc	EVT	0.577803	2.70042e-292	0.595381	1.19101e-99	WTu	KOu	WTu-KOu
Btrc	Stromal	0.691863	1.04497e-60	0.494295	2.72799e-125	WTu	KOu	WTu-KOu
Btrc	Vascular	0.724993	3.19167e-64	0.895804	6.17988e-175	WTu	KOu	WTu-KOu
Btrc	CTB	-0.730766	0	-0.727967	0	WTd	KOd	WTd-KOd
Btrc	STB	0.614774	8.05199e-276	0.591039	0	WTu	KOu	WTu-KOu
Bzw1	CTB	0.343535	9.22737e-48	0.369317	4.36953e-26	WTu	KOu	WTu-KOu
Bzw2	Stromal	0.382327	4.83415e-30	0.536936	2.82343e-128	WTu	KOu	WTu-KOu
C130089K02Rik	Stromal	0.290487	3.49268e-18	0.34152	8.24994e-81	WTu	KOu	WTu-KOu
C130089K02Rik	STB	0.533476	0	0.886942	0	WTu	KOu	WTu-KOu
C130089K02Rik	EVT	0.643599	0	0.353265	1.76655e-57	WTu	KOu	WTu-KOu
C130089K02Rik	CTB	-0.571061	0	-0.588416	0	WTd	KOd	WTd-KOd
C1galt1	STB	0.437086	1.14453e-151	0.289066	1.79267e-131	WTu	KOu	WTu-KOu
C1qtnf1	CTB	0.350465	1.50392e-23	0.507197	0.00437351	WTu	KOu	WTu-KOu
C1qtnf6	CTB	0.295382	1.18193e-15	0.415117	0.000114331	WTu	KOu	WTu-KOu
C2cd2	EVT	0.447686	1.62031e-81	1.57901	3.13738e-154	WTu	KOu	WTu-KOu
C2cd3	Vascular	0.386782	3.87529e-27	0.272793	1.72124e-38	WTu	KOu	WTu-KOu
C2cd5	EVT	0.750901	0	1.63314	0	WTu	KOu	WTu-KOu
C2cd5	STB	0.348715	7.389e-176	0.279706	7.472e-159	WTu	KOu	WTu-KOu
C2cd5	Stromal	0.473369	1.30048e-26	0.462559	7.40612e-117	WTu	KOu	WTu-KOu
C2cd5	CTB	-0.563413	0	-0.591276	0	WTd	KOd	WTd-KOd
C430049B03Rik	CTB	-2.17227	0	-2.17495	0	WTd	KOd	WTd-KOd
C430049B03Rik	STB	0.936764	2.12781e-36	3.38546	0	WTu	KOu	WTu-KOu
C430049B03Rik	Vascular	1.02259	5.20163e-153	1.05429	1.2747e-263	WTu	KOu	WTu-KOu
C430049B03Rik	EVT	2.73618	0	-0.27999	0.000125776	WTu	KOd	WTu-KOd
Caap1	CTB	-0.335641	0	-0.32089	0	WTd	KOd	WTd-KOd
Caap1	STB	0.291897	1.72436e-140	0.335141	1.57934e-239	WTu	KOu	WTu-KOu
Caap1	Stromal	0.254542	1.26117e-20	0.287552	2.16034e-60	WTu	KOu	WTu-KOu
Cab39	EVT	0.400545	4.97298e-161	0.550805	2.99485e-61	WTu	KOu	WTu-KOu
Cab39l	EVT	0.402719	2.24237e-202	0.398112	1.15349e-83	WTu	KOu	WTu-KOu
Cab39l	CTB	-0.332746	0	-0.292925	0	WTd	KOd	WTd-KOd
Cabin1	STB	0.274802	1.00843e-125	1.06778	0	WTu	KOu	WTu-KOu
Cabin1	CTB	-0.683785	0	-0.610267	0	WTd	KOd	WTd-KOd
Cabin1	EVT	1.10594	0	0.506225	2.87243e-81	WTu	KOu	WTu-KOu
Cables1	CTB	-0.253538	1.07008e-220	-0.277562	4.42845e-236	WTd	KOd	WTd-KOd
Cachd1	CTB	-0.688845	0	-0.589776	0	WTd	KOd	WTd-KOd
Cachd1	Vascular	0.490202	5.36423e-23	0.923365	1.00469e-237	WTu	KOu	WTu-KOu
Cachd1	Stromal	0.870996	4.43171e-108	0.741422	6.5446e-164	WTu	KOu	WTu-KOu
Cacna1d	Stromal	0.424327	1.90062e-46	1.75797	0	WTu	KOu	WTu-KOu
Cacna1d	CTB	-1.03449	0	-0.956829	0	WTd	KOd	WTd-KOd
Cacna2d1	Stromal	0.549463	1.53097e-68	0.306436	1.29141e-136	WTu	KOu	WTu-KOu
Cacnb2	CTB	-0.571838	2.12218e-264	-0.728755	2.48357e-288	WTd	KOd	WTd-KOd
Cacul1	CTB	-0.280466	2.06026e-286	-0.289163	5.68943e-290	WTd	KOd	WTd-KOd
Cacul1	EVT	0.352904	1.78491e-157	0.567635	5.54337e-79	WTu	KOu	WTu-KOu
Calcrl	Vascular	2.96635	0	2.63642	0	WTu	KOu	WTu-KOu
Calcrl	CTB	-1.05041	6.73061e-185	-1.10422	6.8695e-222	WTd	KOd	WTd-KOd
Cald1	EVT	1.31391	1.35757e-242	1.19442	3.02005e-62	WTu	KOu	WTu-KOu
Cald1	CTB	-0.860585	9.94577e-298	-0.75837	8.18223e-211	WTd	KOd	WTd-KOd
Cald1	Vascular	0.421139	2.1928e-20	0.905241	7.67472e-85	WTu	KOu	WTu-KOu
Calm3	EVT	-0.320535	2.56871e-08	-0.31802	0.0122118	WTd	KOd	WTd-KOd
Calm3	STB	-0.430665	0.00521171	-0.425895	0.000766118	WTd	KOd	WTd-KOd
Calm3	CTB	0.370707	3.11392e-17	0.358698	1.68231e-14	WTu	KOu	WTu-KOu
Calr	Stromal	-0.963285	1.0064e-41	-1.07643	1.2904e-190	WTd	KOd	WTd-KOd
Calr	CTB	1.23625	0	1.18254	0	WTu	KOu	WTu-KOu
Calr	Vascular	-1.01002	1.15418e-38	-0.989324	1.23842e-102	WTd	KOd	WTd-KOd
Calr	STB	-1.24527	1.06584e-148	-1.19884	5.95155e-188	WTd	KOd	WTd-KOd
Calr	EVT	-1.16944	5.33411e-137	-1.15422	2.62602e-56	WTd	KOd	WTd-KOd
Calu	STB	-0.400154	3.63272e-08	-0.366098	0.00647092	WTd	KOd	WTd-KOd
Camk1d	STB	-1.12124	1.32373e-93	-1.00482	1.58487e-86	WTd	KOd	WTd-KOd
Camk1d	EVT	-1.10735	1.57624e-94	-1.12585	2.00782e-31	WTd	KOd	WTd-KOd
Camk1d	CTB	1.03252	1.83034e-233	0.887474	1.28152e-230	WTu	KOu	WTu-KOu
Camk1d	Vascular	-0.819801	1.49439e-18	-0.736672	4.3254e-35	WTd	KOd	WTd-KOd
Camk1d	Stromal	-0.413946	0.00059431	-0.659055	1.1572e-51	WTd	KOd	WTd-KOd
Camk2d	STB	0.998772	2.26316e-260	0.395676	4.84809e-67	WTu	KOu	WTu-KOu
Camk2d	Stromal	0.796963	2.73416e-50	1.08292	4.86764e-215	WTu	KOu	WTu-KOu
Camk2d	Vascular	0.701906	5.54422e-47	0.85467	6.92129e-127	WTu	KOu	WTu-KOu
Camk2d	CTB	-0.954439	0	-1.08541	0	WTd	KOd	WTd-KOd
Camk2d	EVT	0.659601	8.61957e-92	1.67536	4.26911e-135	WTu	KOu	WTu-KOu
Camk2g	Vascular	0.320962	2.81065e-20	0.368075	3.45609e-49	WTu	KOu	WTu-KOu
Camk2g	Stromal	0.43969	1.34558e-42	1.18587	0	WTu	KOu	WTu-KOu
Camk2g	CTB	-0.605689	0	-0.690314	0	WTd	KOd	WTd-KOd
Camkk2	CTB	-0.329798	1.0322e-240	-0.358476	2.52552e-260	WTd	KOd	WTd-KOd
Camkk2	Stromal	0.610027	2.14461e-58	0.519935	3.74151e-112	WTu	KOu	WTu-KOu
Camkk2	Vascular	0.53242	3.06118e-76	0.469692	3.68649e-136	WTu	KOu	WTu-KOu
Camkmt	CTB	-0.693294	0	-0.71022	0	WTd	KOd	WTd-KOd
Camkmt	EVT	0.764876	0	0.690769	2.60698e-113	WTu	KOu	WTu-KOu
Camkmt	STB	0.580285	2.13836e-261	0.857245	0	WTu	KOu	WTu-KOu
Camkmt	Stromal	0.544397	2.56832e-36	0.525596	3.29622e-104	WTu	KOu	WTu-KOu
Caml	Vascular	0.36408	1.31435e-23	0.264279	3.15113e-40	WTu	KOu	WTu-KOu
Camsap1	CTB	-0.276156	1.98017e-281	-0.293832	2.36022e-272	WTd	KOd	WTd-KOd
Camsap1	Vascular	0.301328	7.92703e-13	0.313043	6.21919e-41	WTu	KOu	WTu-KOu
Camsap2	EVT	0.282803	2.4411e-112	0.800362	1.21524e-116	WTu	KOu	WTu-KOu
Camsap2	Vascular	0.463618	5.90059e-31	0.403386	1.15961e-61	WTu	KOu	WTu-KOu
Camta1	Stromal	0.355513	5.24594e-23	0.394755	1.51142e-63	WTu	KOu	WTu-KOu
Camta1	Vascular	0.36594	1.21822e-09	0.441438	8.86768e-46	WTu	KOu	WTu-KOu
Camta1	STB	0.256854	2.79699e-118	1.38281	0	WTu	KOu	WTu-KOu
Camta1	EVT	1.49575	0	0.297943	3.1007e-42	WTu	KOu	WTu-KOu
Camta1	CTB	-0.968404	0	-0.879425	0	WTd	KOd	WTd-KOd
Capn15	STB	0.483689	5.09364e-187	0.886975	0	WTu	KOu	WTu-KOu
Capn15	CTB	-0.445378	0	-0.431876	0	WTd	KOd	WTd-KOd
Capns1	CTB	0.290259	6.74721e-55	0.377034	8.02333e-24	WTu	KOu	WTu-KOu
Capns1	STB	-0.316074	5.83325e-20	-0.341431	1.4963e-18	WTd	KOd	WTd-KOd
Caprin1	CTB	-0.400583	0	-0.355525	4.08624e-288	WTd	KOd	WTd-KOd
Capza1	STB	0.472169	8.79819e-214	0.748029	0	WTu	KOu	WTu-KOu
Capza1	Stromal	0.501309	1.9653e-40	0.491585	3.37028e-123	WTu	KOu	WTu-KOu
Capza1	EVT	0.726256	0	0.73843	9.11612e-139	WTu	KOu	WTu-KOu
Capza1	Vascular	0.536229	2.89283e-32	0.49914	5.07816e-83	WTu	KOu	WTu-KOu
Capza1	CTB	-0.670964	0	-0.687851	0	WTd	KOd	WTd-KOd
Car2	Vascular	-0.903037	0.00362289	-0.902336	5.80234e-14	WTd	KOd	WTd-KOd
Car2	STB	-1.06706	5.50222e-13	0.597431	1.45318e-27	WTd	KOd	WTd-KOd
Car2	Stromal	-0.839575	0.00015997	-0.970361	1.419e-30	WTd	KOd	WTd-KOd
Car2	EVT	0.685554	1.77603e-48	-1.0287	0.0039287	WTu	KOd	WTu-KOd
Car4	CTB	0.371012	7.385e-07	0.339911	4.67026e-06	WTu	KOu	WTu-KOu
Carmil1	CTB	-0.771574	0	-0.816962	0	WTd	KOd	WTd-KOd
Carmil1	STB	0.354479	5.08023e-127	0.608917	4.10273e-297	WTu	KOu	WTu-KOu
Carmil1	EVT	1.27546	0	2.29764	0	WTu	KOu	WTu-KOu
Carnmt1	EVT	0.39741	5.0274e-198	0.595598	1.44921e-125	WTu	KOu	WTu-KOu
Casc3	CTB	-0.290872	0	-0.29253	0	WTd	KOd	WTd-KOd
Casc3	EVT	0.294636	6.60542e-147	0.565317	9.87014e-114	WTu	KOu	WTu-KOu
Casd1	Vascular	0.630649	1.97024e-65	0.562762	1.85121e-88	WTu	KOu	WTu-KOu
Casd1	CTB	-0.286007	3.21304e-275	-0.299928	5.56375e-253	WTd	KOd	WTd-KOd
Cask	Vascular	0.466317	6.40273e-48	1.04529	0	WTu	KOu	WTu-KOu
Cask	CTB	-0.504366	0	-0.567243	0	WTd	KOd	WTd-KOd
Cask	Stromal	1.49589	0	0.559767	1.54933e-120	WTu	KOu	WTu-KOu
Caskin1	EVT	0.519971	1.71415e-129	1.39936	0	WTu	KOu	WTu-KOu
Casp7	Vascular	0.503467	9.83465e-88	0.339659	2.46979e-87	WTu	KOu	WTu-KOu
Casp8	Vascular	0.567198	9.65639e-66	0.329383	9.81233e-85	WTu	KOu	WTu-KOu
Cast	STB	0.65312	4.2241e-238	0.489356	1.15451e-167	WTu	KOu	WTu-KOu
Cast	EVT	0.297453	6.33448e-137	0.331168	1.0843e-37	WTu	KOu	WTu-KOu
Cast	CTB	-0.474543	0	-0.470801	0	WTd	KOd	WTd-KOd
Casz1	Vascular	0.627151	1.03966e-104	0.417651	2.76845e-91	WTu	KOu	WTu-KOu
Catspere2	CTB	-0.302253	0	-0.317064	0	WTd	KOd	WTd-KOd
Cavin2	Vascular	1.14287	0	0.601994	2.93487e-141	WTu	KOu	WTu-KOu
Cbfa2t2	CTB	-0.586365	0	-0.6186	0	WTd	KOd	WTd-KOd
Cbfa2t2	Vascular	0.321232	1.02851e-16	0.540377	1.31252e-75	WTu	KOu	WTu-KOu
Cbfa2t2	Stromal	0.444906	2.62561e-38	0.436045	6.25182e-102	WTu	KOu	WTu-KOu
Cbfa2t2	STB	0.601883	3.49115e-255	0.635993	0	WTu	KOu	WTu-KOu
Cbfa2t2	EVT	0.508002	2.52011e-245	0.622708	6.57211e-111	WTu	KOu	WTu-KOu
Cbfa2t3	Vascular	0.73724	5.10654e-150	0.466056	3.22528e-124	WTu	KOu	WTu-KOu
Cbfb	CTB	-0.494076	0	-0.425852	0	WTd	KOd	WTd-KOd
Cbfb	Stromal	0.482548	4.93804e-41	0.570169	2.90169e-159	WTu	KOu	WTu-KOu
Cbfb	Vascular	0.516258	1.51405e-28	0.454228	7.64823e-70	WTu	KOu	WTu-KOu
Cbl	CTB	-0.404527	0	-0.400022	0	WTd	KOd	WTd-KOd
Cbl	STB	0.252958	1.60024e-124	0.251678	1.0684e-132	WTu	KOu	WTu-KOu
Cbl	Stromal	0.740983	7.9199e-65	0.41351	4.41357e-77	WTu	KOu	WTu-KOu
Cblb	Stromal	1.31116	2.10569e-99	1.33174	0	WTu	KOu	WTu-KOu
Cblb	Vascular	0.288667	1.55457e-12	0.510247	8.97685e-61	WTu	KOu	WTu-KOu
Cblb	STB	1.17301	0	0.917768	0	WTu	KOu	WTu-KOu
Cblb	CTB	-1.19698	0	-1.08742	0	WTd	KOd	WTd-KOd
Cbx6	Vascular	0.272406	4.55145e-21	0.330766	1.67566e-59	WTu	KOu	WTu-KOu
Cbx7	CTB	-0.864788	0	-0.812135	0	WTd	KOd	WTd-KOd
Cbx7	EVT	1.52341	0	1.78857	4.70928e-194	WTu	KOu	WTu-KOu
Cbx7	STB	0.38506	3.91621e-92	1.33272	0	WTu	KOu	WTu-KOu
Ccar1	CTB	-0.854093	0	-0.812999	0	WTd	KOd	WTd-KOd
Ccar1	STB	0.865747	0	0.724413	1.33206e-300	WTu	KOu	WTu-KOu
Ccar1	Stromal	0.478071	1.1521e-35	0.746622	1.40717e-190	WTu	KOu	WTu-KOu
Ccar1	Vascular	0.527632	1.44816e-31	0.551342	1.35089e-81	WTu	KOu	WTu-KOu
Ccar1	EVT	0.768027	0	0.851383	7.19974e-105	WTu	KOu	WTu-KOu
Ccbe1	Stromal	0.843422	3.41563e-69	0.970393	6.2407e-218	WTu	KOu	WTu-KOu
Ccbe1	CTB	-0.756386	0	-0.71361	0	WTd	KOd	WTd-KOd
Ccdc138	CTB	-0.27878	0	-0.281903	0	WTd	KOd	WTd-KOd
Ccdc138	STB	0.322801	1.27912e-194	0.319792	9.4678e-278	WTu	KOu	WTu-KOu
Ccdc162	EVT	0.703139	2.38371e-296	1.55255	0	WTu	KOu	WTu-KOu
Ccdc162	CTB	-0.339644	1.07655e-247	-0.340505	9.07931e-260	WTd	KOd	WTd-KOd
Ccdc171	STB	0.500375	2.89099e-296	0.372935	8.96821e-275	WTu	KOu	WTu-KOu
Ccdc171	EVT	0.27963	1.19171e-172	0.360033	1.5982e-92	WTu	KOu	WTu-KOu
Ccdc171	CTB	-0.365261	0	-0.354596	0	WTd	KOd	WTd-KOd
Ccdc186	CTB	-0.367311	0	-0.308133	0	WTd	KOd	WTd-KOd
Ccdc186	STB	0.284397	9.43752e-131	0.36979	3.87072e-195	WTu	KOu	WTu-KOu
Ccdc191	CTB	-0.348314	0	-0.332713	0	WTd	KOd	WTd-KOd
Ccdc191	EVT	0.288776	1.07832e-141	0.334014	3.23879e-50	WTu	KOu	WTu-KOu
Ccdc191	STB	0.39411	2.18394e-240	0.305325	5.22235e-254	WTu	KOu	WTu-KOu
Ccdc50	EVT	0.429165	9.78171e-194	0.451244	1.08272e-65	WTu	KOu	WTu-KOu
Ccdc50	CTB	-0.350231	0	-0.416323	0	WTd	KOd	WTd-KOd
Ccdc50	Stromal	0.439501	1.68916e-24	0.280761	7.10027e-49	WTu	KOu	WTu-KOu
Ccdc58	CTB	-0.381939	0	-0.357965	0	WTd	KOd	WTd-KOd
Ccdc58	EVT	0.274216	1.71688e-128	0.492969	3.86883e-118	WTu	KOu	WTu-KOu
Ccdc58	Stromal	0.300132	2.31275e-21	0.329834	2.68718e-92	WTu	KOu	WTu-KOu
Ccdc58	STB	0.439327	3.84651e-223	0.291459	4.57629e-207	WTu	KOu	WTu-KOu
Ccdc6	STB	0.495241	1.69003e-176	0.554139	3.57192e-199	WTu	KOu	WTu-KOu
Ccdc6	CTB	-0.367341	0	-0.322445	2.70211e-260	WTd	KOd	WTd-KOd
Ccdc68	CTB	-0.377687	2.33664e-237	-0.29086	2.11715e-208	WTd	KOd	WTd-KOd
Ccdc82	Stromal	0.360115	5.68524e-41	0.368163	1.1028e-125	WTu	KOu	WTu-KOu
Ccdc82	CTB	-0.317638	0	-0.324873	0	WTd	KOd	WTd-KOd
Ccdc82	Vascular	0.459893	7.28201e-45	0.548236	4.87034e-110	WTu	KOu	WTu-KOu
Ccdc85a	Vascular	1.54382	0	1.08047	0	WTu	KOu	WTu-KOu
Ccdc88a	CTB	-0.59547	0	-0.641401	0	WTd	KOd	WTd-KOd
Ccdc88a	Vascular	0.864228	2.48317e-111	0.938807	8.35003e-214	WTu	KOu	WTu-KOu
Ccdc88a	Stromal	1.02736	3.28907e-132	0.563882	4.49275e-109	WTu	KOu	WTu-KOu
Ccdc88a	STB	0.28775	3.91464e-120	0.418177	1.18061e-223	WTu	KOu	WTu-KOu
Ccdc93	Stromal	0.28389	3.51635e-15	0.379545	8.29934e-101	WTu	KOu	WTu-KOu
Ccdc93	CTB	-0.309991	7.39772e-291	-0.305247	4.47668e-270	WTd	KOd	WTd-KOd
Ccl25	CTB	-0.436562	0	-0.514958	0	WTd	KOd	WTd-KOd
Ccl25	STB	0.381008	6.82419e-218	0.649328	0	WTu	KOu	WTu-KOu
Ccl25	EVT	0.494719	0	0.521377	1.39671e-124	WTu	KOu	WTu-KOu
Ccm2	CTB	-0.391742	0	-0.39684	0	WTd	KOd	WTd-KOd
Ccm2	Vascular	0.395367	5.46192e-24	0.415856	3.67382e-44	WTu	KOu	WTu-KOu
Ccm2	Stromal	0.391847	6.86545e-29	0.254732	6.71043e-42	WTu	KOu	WTu-KOu
Ccm2l	Vascular	0.908837	0	0.589556	0	WTu	KOu	WTu-KOu
Ccnd3	CTB	-0.510544	1.04609e-203	-0.454202	8.74988e-180	WTd	KOd	WTd-KOd
Ccnd3	Stromal	1.52154	2.83072e-138	0.694099	4.26351e-88	WTu	KOu	WTu-KOu
Ccnd3	Vascular	0.861866	2.11128e-96	0.795957	3.19437e-146	WTu	KOu	WTu-KOu
Ccnjl	Vascular	0.475893	1.20385e-31	0.415525	1.62129e-77	WTu	KOu	WTu-KOu
Ccnjl	STB	0.37165	1.8168e-86	0.421334	6.96684e-102	WTu	KOu	WTu-KOu
Ccnl1	STB	1.10832	0	0.900017	0	WTu	KOu	WTu-KOu
Ccnl1	Vascular	0.792867	3.08935e-60	0.930526	2.34567e-195	WTu	KOu	WTu-KOu
Ccnl1	Stromal	0.831144	7.94645e-79	1.07385	0	WTu	KOu	WTu-KOu
Ccnl1	CTB	-1.01664	0	-1.08484	0	WTd	KOd	WTd-KOd
Ccnl1	EVT	0.62634	0	0.466349	9.48842e-74	WTu	KOu	WTu-KOu
Ccnl2	STB	0.791006	0	0.972714	0	WTu	KOu	WTu-KOu
Ccnl2	EVT	0.957449	0	0.647081	5.62743e-117	WTu	KOu	WTu-KOu
Ccnl2	CTB	-0.958516	0	-0.950715	0	WTd	KOd	WTd-KOd
Ccnl2	Stromal	0.575521	6.47431e-57	0.793494	3.06598e-225	WTu	KOu	WTu-KOu
Ccnl2	Vascular	0.750921	9.34145e-54	0.73163	6.54256e-115	WTu	KOu	WTu-KOu
Ccnt1	Vascular	0.266382	2.33663e-11	0.312197	5.83241e-45	WTu	KOu	WTu-KOu
Ccnt1	STB	0.441566	1.46779e-202	0.369885	1.78731e-201	WTu	KOu	WTu-KOu
Ccnt1	EVT	0.303406	2.50446e-158	0.321424	1.02008e-45	WTu	KOu	WTu-KOu
Ccnt1	CTB	-0.3846	0	-0.3615	0	WTd	KOd	WTd-KOd
Ccnt2	Stromal	0.69031	3.50868e-62	0.832326	2.62948e-244	WTu	KOu	WTu-KOu
Ccnt2	Vascular	0.790491	9.81022e-60	0.751112	2.24945e-117	WTu	KOu	WTu-KOu
Ccnt2	STB	0.816523	0	0.890624	0	WTu	KOu	WTu-KOu
Ccnt2	EVT	0.799144	0	0.610661	1.03954e-98	WTu	KOu	WTu-KOu
Ccnt2	CTB	-0.92364	0	-0.935978	0	WTd	KOd	WTd-KOd
Ccny	STB	0.391274	3.02355e-133	1.37071	0	WTu	KOu	WTu-KOu
Ccny	CTB	-0.893823	0	-0.856807	0	WTd	KOd	WTd-KOd
Ccny	EVT	1.17079	0	0.307555	1.19026e-33	WTu	KOu	WTu-KOu
Ccny	Vascular	0.866401	2.73465e-74	0.763114	8.96199e-124	WTu	KOu	WTu-KOu
Ccnyl1	Vascular	0.327972	4.59403e-24	0.365445	5.01597e-54	WTu	KOu	WTu-KOu
Ccnyl1	EVT	0.553441	6.52344e-254	0.466737	1.19706e-91	WTu	KOu	WTu-KOu
Ccnyl1	STB	0.374444	1.37805e-132	0.51258	1.38395e-224	WTu	KOu	WTu-KOu
Ccnyl1	CTB	-0.429483	0	-0.436084	0	WTd	KOd	WTd-KOd
Ccser1	CTB	-1.3888	0	-1.35719	0	WTd	KOd	WTd-KOd
Ccser1	STB	0.837172	1.29321e-63	2.2417	0	WTu	KOu	WTu-KOu
Ccser1	EVT	1.93615	0	1.64846	4.69446e-300	WTu	KOu	WTu-KOu
Ccser2	Vascular	0.362493	1.64095e-17	0.334135	6.26462e-44	WTu	KOu	WTu-KOu
Ccser2	STB	0.492678	9.42578e-196	0.261616	2.82778e-127	WTu	KOu	WTu-KOu
Ccser2	CTB	-0.381821	0	-0.349246	0	WTd	KOd	WTd-KOd
Cct2	CTB	0.313465	4.66868e-36	0.393905	1.40307e-19	WTu	KOu	WTu-KOu
Cct6a	STB	-0.258308	2.72997e-22	-0.275369	1.29033e-19	WTd	KOd	WTd-KOd
Cct7	CTB	0.270632	2.85097e-41	0.306539	1.64884e-22	WTu	KOu	WTu-KOu
Cct8	CTB	0.321351	1.77104e-43	0.290828	1.13348e-42	WTu	KOu	WTu-KOu
Cd151	STB	-0.403391	3.06886e-07	-0.481187	0.00174786	WTd	KOd	WTd-KOd
Cd151	CTB	0.49583	1.50444e-08	0.489178	0.000684787	WTu	KOu	WTu-KOu
Cd200	Vascular	0.775724	2.60151e-144	0.475655	1.88804e-168	WTu	KOu	WTu-KOu
Cd2ap	CTB	-0.722271	0	-0.576665	6.94404e-267	WTd	KOd	WTd-KOd
Cd320	CTB	0.471897	0.00012265	0.322436	4.17663e-05	WTu	KOu	WTu-KOu
Cd34	Vascular	1.43869	0	0.940803	2.31348e-282	WTu	KOu	WTu-KOu
Cd36	Vascular	3.13049	0	2.20036	0	WTu	KOu	WTu-KOu
Cd36	CTB	-0.88922	1.3765e-120	-0.787886	1.81615e-100	WTd	KOd	WTd-KOd
Cd38	Vascular	0.767717	1.31322e-189	0.433344	6.93184e-126	WTu	KOu	WTu-KOu
Cd44	Vascular	0.642793	1.73619e-111	0.537337	3.6739e-104	WTu	KOu	WTu-KOu
Cd44	Stromal	0.965737	2.15286e-50	0.767685	2.86512e-100	WTu	KOu	WTu-KOu
Cd47	Vascular	0.561657	1.41522e-38	0.274739	5.72423e-42	WTu	KOu	WTu-KOu
Cd63	Stromal	-0.764986	0.00639383	-0.738018	5.84974e-18	WTd	KOd	WTd-KOd
Cd63	Vascular	-0.952429	1.85941e-07	-0.754197	4.37686e-12	WTd	KOd	WTd-KOd
Cd63	CTB	0.825484	1.47711e-16	0.784654	1.67923e-47	WTu	KOu	WTu-KOu
Cd81	Vascular	0.741114	4.34902e-64	0.388123	3.4225e-67	WTu	KOu	WTu-KOu
Cd82	CTB	0.32516	6.16411e-41	0.442646	7.12165e-17	WTu	KOu	WTu-KOu
Cd9	EVT	-0.322563	0.0445347	0.741583	4.66945e-38	WTd	KOd	WTd-KOd
Cd93	Vascular	1.5671	0	1.04232	2.37585e-205	WTu	KOu	WTu-KOu
Cdc14a	Vascular	0.383116	1.30207e-22	0.432297	7.13423e-73	WTu	KOu	WTu-KOu
Cdc14a	Stromal	0.46136	8.15294e-58	0.481185	5.82288e-158	WTu	KOu	WTu-KOu
Cdc14a	CTB	-0.340414	0	-0.368548	0	WTd	KOd	WTd-KOd
Cdc14b	Stromal	0.292418	1.07751e-22	0.338054	1.58246e-113	WTu	KOu	WTu-KOu
Cdc14b	CTB	-0.310307	1.34681e-302	-0.278293	5.13858e-269	WTd	KOd	WTd-KOd
Cdc27	EVT	0.448289	3.79886e-201	0.62155	4.52933e-89	WTu	KOu	WTu-KOu
Cdc27	CTB	-0.424944	0	-0.4323	0	WTd	KOd	WTd-KOd
Cdc27	STB	0.325173	5.21185e-138	0.595558	1.54854e-268	WTu	KOu	WTu-KOu
Cdc27	Vascular	0.263363	5.07495e-15	0.275931	8.35813e-37	WTu	KOu	WTu-KOu
Cdc34	CTB	0.345762	6.25377e-12	0.323026	4.82967e-09	WTu	KOu	WTu-KOu
Cdc37l1	STB	0.677826	2.53887e-284	0.345331	1.78521e-199	WTu	KOu	WTu-KOu
Cdc37l1	CTB	-0.473665	0	-0.478232	0	WTd	KOd	WTd-KOd
Cdc37l1	Stromal	0.327285	1.62221e-26	0.643376	3.47469e-165	WTu	KOu	WTu-KOu
Cdc42bpa	Stromal	0.834483	8.97795e-67	0.95047	2.74829e-174	WTu	KOu	WTu-KOu
Cdc42bpa	EVT	0.421529	2.06756e-180	0.318505	1.63195e-41	WTu	KOu	WTu-KOu
Cdc42bpa	CTB	-1.18813	0	-1.1435	0	WTd	KOd	WTd-KOd
Cdc42bpa	STB	1.32028	0	0.809244	7.89666e-239	WTu	KOu	WTu-KOu
Cdc42bpa	Vascular	1.46096	6.79594e-170	1.40954	0	WTu	KOu	WTu-KOu
Cdc42bpb	Stromal	0.284563	6.19451e-13	0.308008	4.38877e-67	WTu	KOu	WTu-KOu
Cdc42bpb	CTB	-0.686982	0	-0.644047	0	WTd	KOd	WTd-KOd
Cdc42bpb	STB	0.479015	1.13984e-184	0.766363	0	WTu	KOu	WTu-KOu
Cdc42bpb	EVT	0.740673	0	0.599292	2.57011e-81	WTu	KOu	WTu-KOu
Cdc42bpb	Vascular	0.783013	9.42329e-56	0.63036	1.10447e-91	WTu	KOu	WTu-KOu
Cdc42ep1	Vascular	0.506391	3.59535e-177	0.436466	7.67855e-197	WTu	KOu	WTu-KOu
Cdc42se2	CTB	-0.795784	0	-0.758931	0	WTd	KOd	WTd-KOd
Cdc73	EVT	0.546706	1.71133e-171	1.00895	8.06432e-86	WTu	KOu	WTu-KOu
Cdc73	STB	0.415433	1.40415e-120	0.701433	1.09694e-171	WTu	KOu	WTu-KOu
Cdc73	CTB	-0.412197	0	-0.465124	2.10082e-293	WTd	KOd	WTd-KOd
Cdcp1	EVT	0.484446	9.41282e-176	1.12293	1.68568e-295	WTu	KOu	WTu-KOu
Cdh13	CTB	-1.44885	3.31206e-269	-1.22325	4.21312e-260	WTd	KOd	WTd-KOd
Cdh2	Vascular	0.579	1.5205e-72	0.808128	5.55775e-257	WTu	KOu	WTu-KOu
Cdh23	STB	0.584576	8.31014e-208	0.631448	8.72776e-165	WTu	KOu	WTu-KOu
Cdh5	EVT	-0.311574	0.0418636	-1.13625	0.000777567	WTd	KOd	WTd-KOd
Cdh5	Vascular	0.580692	2.87064e-32	0.274184	1.09966e-12	WTu	KOu	WTu-KOu
Cdin1	EVT	0.505671	1.89255e-264	0.736571	2.14866e-166	WTu	KOu	WTu-KOu
Cdin1	STB	0.520475	1.51668e-220	0.669578	0	WTu	KOu	WTu-KOu
Cdin1	Vascular	0.475384	5.90474e-27	0.374754	6.77373e-50	WTu	KOu	WTu-KOu
Cdin1	CTB	-0.520794	0	-0.554441	0	WTd	KOd	WTd-KOd
Cdip1	EVT	0.318683	2.25974e-134	0.832896	3.05827e-174	WTu	KOu	WTu-KOu
Cdip1	CTB	-0.288364	4.95206e-281	-0.270677	1.2704e-252	WTd	KOd	WTd-KOd
Cdipt	CTB	0.260602	3.4659e-25	0.273358	5.02201e-15	WTu	KOu	WTu-KOu
Cdk11b	EVT	0.305315	2.19651e-157	0.322181	3.76087e-59	WTu	KOu	WTu-KOu
Cdk12	EVT	0.820624	0	0.737572	4.15811e-106	WTu	KOu	WTu-KOu
Cdk12	STB	0.884747	0	0.844388	0	WTu	KOu	WTu-KOu
Cdk12	Stromal	0.376203	1.05177e-30	0.810582	2.32443e-191	WTu	KOu	WTu-KOu
Cdk12	Vascular	0.789215	3.29266e-64	0.712417	1.00147e-118	WTu	KOu	WTu-KOu
Cdk12	CTB	-0.911938	0	-0.913147	0	WTd	KOd	WTd-KOd
Cdk13	STB	0.930615	0	0.961972	0	WTu	KOu	WTu-KOu
Cdk13	CTB	-0.82872	0	-0.821891	0	WTd	KOd	WTd-KOd
Cdk13	Stromal	0.549868	2.69645e-38	0.679218	1.03319e-171	WTu	KOu	WTu-KOu
Cdk13	Vascular	0.448239	2.00295e-29	0.48649	2.59586e-77	WTu	KOu	WTu-KOu
Cdk13	EVT	0.635782	3.15163e-251	0.527372	1.27445e-61	WTu	KOu	WTu-KOu
Cdk14	EVT	1.32327	0	1.71009	8.07867e-233	WTu	KOu	WTu-KOu
Cdk14	STB	0.390462	3.56803e-96	1.23076	0	WTu	KOu	WTu-KOu
Cdk14	CTB	-1.32758	0	-1.44857	0	WTd	KOd	WTd-KOd
Cdk14	Stromal	2.02404	2.43468e-180	0.692866	8.00054e-76	WTu	KOu	WTu-KOu
Cdk14	Vascular	0.473647	6.31664e-07	1.56868	4.45937e-136	WTu	KOu	WTu-KOu
Cdk17	Stromal	0.519944	2.30213e-40	0.258441	3.06954e-42	WTu	KOu	WTu-KOu
Cdk17	CTB	-1.01907	0	-1.05315	0	WTd	KOd	WTd-KOd
Cdk17	Vascular	1.12997	1.97087e-116	1.01956	1.79187e-185	WTu	KOu	WTu-KOu
Cdk17	STB	0.499664	2.91673e-127	1.56878	0	WTu	KOu	WTu-KOu
Cdk19	STB	0.861468	4.49871e-236	1.08324	0	WTu	KOu	WTu-KOu
Cdk19	Stromal	0.422629	1.44355e-26	0.364839	8.11334e-73	WTu	KOu	WTu-KOu
Cdk19	CTB	-0.768478	0	-0.767612	0	WTd	KOd	WTd-KOd
Cdk19	Vascular	0.797907	2.62989e-48	0.728722	1.72166e-87	WTu	KOu	WTu-KOu
Cdk2ap2	CTB	0.255766	2.24188e-19	0.302522	4.2711e-18	WTu	KOu	WTu-KOu
Cdk6	CTB	-0.372254	3.21229e-231	-0.534706	1.44179e-298	WTd	KOd	WTd-KOd
Cdk6	Vascular	0.250482	2.17027e-11	0.790268	1.07919e-155	WTu	KOu	WTu-KOu
Cdk6	Stromal	1.21284	6.35691e-217	0.694769	5.96495e-108	WTu	KOu	WTu-KOu
Cdk7	CTB	-0.371254	0	-0.389876	0	WTd	KOd	WTd-KOd
Cdk7	EVT	0.458598	1.37758e-235	0.681848	9.9372e-127	WTu	KOu	WTu-KOu
Cdk7	Vascular	0.278919	6.93553e-15	0.388382	1.32009e-53	WTu	KOu	WTu-KOu
Cdk8	Stromal	-0.828235	9.67447e-42	-0.581881	8.67537e-37	WTd	KOd	WTd-KOd
Cdk8	EVT	-1.19075	9.09114e-192	-0.921205	1.60449e-23	WTd	KOd	WTd-KOd
Cdk8	STB	-1.2156	8.11115e-192	-0.888058	1.35091e-70	WTd	KOd	WTd-KOd
Cdk8	Vascular	-0.820898	1.69e-33	-0.67686	1.51483e-29	WTd	KOd	WTd-KOd
Cdk8	CTB	1.17979	0	0.787156	3.33349e-182	WTu	KOu	WTu-KOu
Cdkal1	Vascular	0.695672	1.98339e-53	0.811849	2.30995e-171	WTu	KOu	WTu-KOu
Cdkal1	STB	0.862288	0	1.11177	0	WTu	KOu	WTu-KOu
Cdkal1	EVT	1.0975	0	1.01692	6.30529e-172	WTu	KOu	WTu-KOu
Cdkal1	Stromal	0.964244	1.13361e-105	0.653212	1.06734e-182	WTu	KOu	WTu-KOu
Cdkal1	CTB	-1.11957	0	-1.02179	0	WTd	KOd	WTd-KOd
Cdkn1c	Vascular	1.07575	8.20572e-71	0.470445	4.90701e-28	WTu	KOu	WTu-KOu
Cds1	EVT	0.496683	2.46323e-142	1.28262	3.7128e-226	WTu	KOu	WTu-KOu
Cds2	Vascular	0.483737	2.47922e-29	0.279135	1.48928e-41	WTu	KOu	WTu-KOu
Cdv3	CTB	0.380586	6.96225e-43	0.382024	1.27007e-25	WTu	KOu	WTu-KOu
Cdyl	EVT	0.347644	2.94481e-142	0.344728	4.10211e-56	WTu	KOu	WTu-KOu
Cdyl	Vascular	0.787244	8.08952e-66	0.705898	8.73161e-123	WTu	KOu	WTu-KOu
Cdyl	Stromal	0.476639	1.23588e-31	0.896506	6.38525e-228	WTu	KOu	WTu-KOu
Cdyl	STB	1.21016	0	0.701981	0	WTu	KOu	WTu-KOu
Cdyl	CTB	-0.905605	0	-0.854172	0	WTd	KOd	WTd-KOd
Cdyl2	CTB	-0.736799	0	-0.724635	0	WTd	KOd	WTd-KOd
Cdyl2	Vascular	1.41031	0	1.14564	0	WTu	KOu	WTu-KOu
Ceacam11	Vascular	-1.155	5.11364e-103	-1.09574	1.74168e-210	WTd	KOd	WTd-KOd
Ceacam11	STB	-1.40193	0	-1.25689	0	WTd	KOd	WTd-KOd
Ceacam11	CTB	1.39451	0	1.28428	0	WTu	KOu	WTu-KOu
Ceacam11	Stromal	-1.16206	1.52687e-118	-1.16402	0	WTd	KOd	WTd-KOd
Ceacam11	EVT	-1.2948	0	-1.39027	6.16193e-111	WTd	KOd	WTd-KOd
Ceacam12	CTB	1.3094	0	1.23504	0	WTu	KOu	WTu-KOu
Ceacam12	EVT	-1.17879	2.31606e-215	-1.37901	5.0221e-100	WTd	KOd	WTd-KOd
Ceacam12	Vascular	-1.14852	1.19986e-73	-1.08979	9.77897e-183	WTd	KOd	WTd-KOd
Ceacam12	Stromal	-1.07727	2.39209e-75	-1.12118	7.34078e-295	WTd	KOd	WTd-KOd
Ceacam12	STB	-1.33016	1.98877e-253	-1.16097	2.49967e-261	WTd	KOd	WTd-KOd
Ceacam13	STB	-1.06212	5.90835e-09	-1.00778	2.91178e-23	WTd	KOd	WTd-KOd
Ceacam13	Vascular	-0.825006	0.0175376	-0.988393	1.12837e-23	WTd	KOd	WTd-KOd
Ceacam13	CTB	1.04727	5.8587e-33	1.0959	8.39756e-117	WTu	KOu	WTu-KOu
Ceacam13	Stromal	-0.90724	0.000663726	-0.994971	1.15397e-39	WTd	KOd	WTd-KOd
Ceacam13	EVT	-0.942684	0.00011933	-1.20585	7.52803e-10	WTd	KOd	WTd-KOd
Ceacam14	EVT	-0.97338	1.74108e-180	-1.39057	4.65389e-103	WTd	KOd	WTd-KOd
Ceacam14	STB	-1.37558	3.42305e-292	-1.08871	1.8741e-237	WTd	KOd	WTd-KOd
Ceacam14	Vascular	-1.06685	1.86844e-73	-1.13737	1.0703e-193	WTd	KOd	WTd-KOd
Ceacam14	CTB	1.23772	0	1.23083	0	WTu	KOu	WTu-KOu
Ceacam14	Stromal	-1.12979	3.99717e-89	-1.13836	0	WTd	KOd	WTd-KOd
Ceacam3	Vascular	-1.0306	2.47445e-10	-1.04894	8.5672e-34	WTd	KOd	WTd-KOd
Ceacam3	CTB	0.985083	5.90031e-60	0.955437	7.52654e-114	WTu	KOu	WTu-KOu
Ceacam3	Stromal	-1.09194	8.32986e-14	-1.08461	2.91229e-58	WTd	KOd	WTd-KOd
Ceacam3	STB	-1.30299	1.34527e-39	-0.520516	0.00216863	WTd	KOd	WTd-KOd
Ceacam5	EVT	-0.750813	6.32812e-44	-1.29114	3.34179e-50	WTd	KOd	WTd-KOd
Ceacam5	Vascular	-1.18771	1.35615e-38	-1.09947	4.47295e-97	WTd	KOd	WTd-KOd
Ceacam5	Stromal	-1.18997	8.1441e-42	-1.12252	8.26089e-160	WTd	KOd	WTd-KOd
Ceacam5	CTB	1.1713	2.83178e-280	1.09497	0	WTu	KOu	WTu-KOu
Ceacam5	STB	-1.40313	4.40443e-128	-0.773418	7.04864e-72	WTd	KOd	WTd-KOd
Cecr2	CTB	-0.473013	0	-0.422802	5.49447e-303	WTd	KOd	WTd-KOd
Cecr2	STB	0.700331	3.32935e-259	0.610212	0	WTu	KOu	WTu-KOu
Celf1	STB	0.567233	1.44307e-175	0.600713	1.84273e-173	WTu	KOu	WTu-KOu
Celf1	Vascular	0.269234	1.10128e-17	0.430368	4.18286e-52	WTu	KOu	WTu-KOu
Celf1	Stromal	0.528024	3.89485e-35	0.434399	1.164e-86	WTu	KOu	WTu-KOu
Celf1	EVT	0.486692	3.45784e-180	0.537592	4.34104e-49	WTu	KOu	WTu-KOu
Celf1	CTB	-0.569952	0	-0.56436	0	WTd	KOd	WTd-KOd
Celf2	EVT	0.560704	7.88341e-221	0.714285	2.29364e-103	WTu	KOu	WTu-KOu
Celf2	Vascular	0.421344	4.08987e-08	1.465	3.99564e-181	WTu	KOu	WTu-KOu
Celf2	CTB	-1.15051	0	-1.26847	0	WTd	KOd	WTd-KOd
Celf2	STB	0.783664	6.41153e-240	0.564614	5.06565e-203	WTu	KOu	WTu-KOu
Celf2	Stromal	2.08486	4.41808e-288	1.25882	6.67416e-216	WTu	KOu	WTu-KOu
Cemip2	CTB	-0.352587	6.34368e-186	-0.471511	5.87259e-191	WTd	KOd	WTd-KOd
Cemip2	Vascular	1.56079	0	1.41417	0	WTu	KOu	WTu-KOu
Cenpc1	STB	0.397342	8.27954e-206	0.2573	5.69022e-169	WTu	KOu	WTu-KOu
Cenpc1	CTB	-0.392169	0	-0.381652	0	WTd	KOd	WTd-KOd
Cenpc1	EVT	0.312925	3.08349e-145	0.268675	8.33526e-44	WTu	KOu	WTu-KOu
Cenpc1	Stromal	0.395721	1.6416e-38	0.430271	3.15604e-112	WTu	KOu	WTu-KOu
Cep112	Vascular	0.664462	5.23674e-56	1.02325	9.47351e-274	WTu	KOu	WTu-KOu
Cep112	STB	0.910355	0	0.393113	2.85705e-187	WTu	KOu	WTu-KOu
Cep112	Stromal	1.06328	4.25511e-156	0.854548	7.83576e-180	WTu	KOu	WTu-KOu
Cep112	CTB	-0.860994	0	-0.812952	0	WTd	KOd	WTd-KOd
Cep120	EVT	0.457064	4.57852e-220	0.440797	8.91072e-80	WTu	KOu	WTu-KOu
Cep120	CTB	-0.332265	0	-0.373471	0	WTd	KOd	WTd-KOd
Cep128	Stromal	0.527543	3.92365e-34	1.01847	0	WTu	KOu	WTu-KOu
Cep128	CTB	-0.522314	0	-0.595246	0	WTd	KOd	WTd-KOd
Cep162	STB	0.268882	2.11904e-134	0.309219	4.13936e-214	WTu	KOu	WTu-KOu
Cep162	CTB	-0.261385	2.53811e-263	-0.283086	0	WTd	KOd	WTd-KOd
Cep170	Stromal	0.613555	8.01594e-62	0.64091	8.67093e-136	WTu	KOu	WTu-KOu
Cep170	Vascular	0.664813	1.38022e-54	0.684709	1.33023e-119	WTu	KOu	WTu-KOu
Cep170	CTB	-0.717819	0	-0.734196	0	WTd	KOd	WTd-KOd
Cep170	STB	0.468521	8.90726e-173	0.821742	0	WTu	KOu	WTu-KOu
Cep192	STB	0.254528	8.24435e-126	0.65897	0	WTu	KOu	WTu-KOu
Cep192	Stromal	0.422452	1.1522e-24	0.438309	5.8772e-89	WTu	KOu	WTu-KOu
Cep192	CTB	-0.444067	0	-0.514878	0	WTd	KOd	WTd-KOd
Cep250	EVT	0.323028	2.2859e-154	0.348225	1.7508e-76	WTu	KOu	WTu-KOu
Cep250	CTB	-0.346193	0	-0.319436	0	WTd	KOd	WTd-KOd
Cep250	Vascular	0.475879	4.81088e-42	0.44037	6.59213e-85	WTu	KOu	WTu-KOu
Cep290	CTB	-0.280572	3.71339e-302	-0.307793	0	WTd	KOd	WTd-KOd
Cep295	Vascular	0.305167	2.24111e-18	0.366483	6.70671e-60	WTu	KOu	WTu-KOu
Cep295	Stromal	0.354633	1.40222e-31	0.358835	7.47918e-93	WTu	KOu	WTu-KOu
Cep295	STB	0.27757	2.3361e-123	0.385591	4.14945e-253	WTu	KOu	WTu-KOu
Cep295	CTB	-0.374121	0	-0.409464	0	WTd	KOd	WTd-KOd
Cep295	EVT	0.373022	3.59175e-198	0.299387	2.01216e-59	WTu	KOu	WTu-KOu
Cep350	CTB	-0.71477	0	-0.771931	0	WTd	KOd	WTd-KOd
Cep350	STB	0.657618	4.05063e-209	1.09422	0	WTu	KOu	WTu-KOu
Cep350	Stromal	0.335742	1.94535e-24	0.450001	4.2178e-96	WTu	KOu	WTu-KOu
Cep350	Vascular	0.47208	5.25109e-25	0.328636	2.59688e-45	WTu	KOu	WTu-KOu
Cep350	EVT	0.735095	2.75344e-266	0.681203	1.60486e-76	WTu	KOu	WTu-KOu
Cep57l1	EVT	0.257035	9.92302e-115	0.356724	1.65014e-112	WTu	KOu	WTu-KOu
Cep68	Vascular	0.403433	7.78945e-28	0.29044	7.51307e-45	WTu	KOu	WTu-KOu
Cep70	CTB	-0.346749	0	-0.300962	0	WTd	KOd	WTd-KOd
Cep70	EVT	0.611558	0	0.425667	9.53711e-113	WTu	KOu	WTu-KOu
Cep83	Vascular	0.492245	1.85711e-37	0.327367	7.34064e-32	WTu	KOu	WTu-KOu
Cep83	STB	0.319008	8.91679e-175	0.503322	0	WTu	KOu	WTu-KOu
Cep83	CTB	-0.476678	0	-0.382593	0	WTd	KOd	WTd-KOd
Cep85l	CTB	-0.520558	0	-0.566555	0	WTd	KOd	WTd-KOd
Cep85l	Vascular	1.01896	6.33394e-94	1.01626	1.01374e-212	WTu	KOu	WTu-KOu
Cep95	STB	0.274743	7.00074e-138	0.282322	3.9393e-196	WTu	KOu	WTu-KOu
Cep95	CTB	-0.252155	9.31041e-263	-0.260163	4.15158e-289	WTd	KOd	WTd-KOd
Cept1	CTB	-0.409302	0	-0.463123	0	WTd	KOd	WTd-KOd
Cept1	Stromal	0.417059	1.58833e-33	0.508381	1.69893e-96	WTu	KOu	WTu-KOu
Cept1	Vascular	0.824649	7.68911e-75	0.583347	1.19627e-99	WTu	KOu	WTu-KOu
Cerk	CTB	-0.481996	0	-0.422404	2.59826e-287	WTd	KOd	WTd-KOd
Cerk	STB	0.625472	1.03435e-207	0.256367	4.7753e-99	WTu	KOu	WTu-KOu
Cerk	Vascular	0.289005	2.10633e-18	0.388548	6.37835e-45	WTu	KOu	WTu-KOu
Cerk	Stromal	0.428324	6.39141e-20	0.591203	6.98177e-146	WTu	KOu	WTu-KOu
Cers4	Vascular	0.833203	5.63386e-220	0.615689	4.68462e-292	WTu	KOu	WTu-KOu
Cers5	CTB	-0.313038	0	-0.283049	0	WTd	KOd	WTd-KOd
Cers6	Stromal	0.557074	7.66505e-13	1.49731	0	WTu	KOu	WTu-KOu
Cers6	STB	1.5187	0	0.283654	5.25521e-54	WTu	KOu	WTu-KOu
Cers6	CTB	-0.776162	0	-0.783691	0	WTd	KOd	WTd-KOd
Cert1	Vascular	0.517478	1.51457e-42	0.670411	5.00834e-127	WTu	KOu	WTu-KOu
Cert1	Stromal	0.507127	1.93916e-39	0.598847	5.363e-152	WTu	KOu	WTu-KOu
Cert1	CTB	-0.511647	0	-0.557082	0	WTd	KOd	WTd-KOd
Cert1	EVT	0.314705	1.33533e-143	0.399598	4.07192e-58	WTu	KOu	WTu-KOu
Cfdp1	EVT	0.424461	7.55457e-199	0.377202	9.48036e-51	WTu	KOu	WTu-KOu
Cfdp1	CTB	-0.344564	0	-0.253899	5.08157e-267	WTd	KOd	WTd-KOd
Cfdp1	Vascular	0.476962	4.81135e-28	0.272186	1.63971e-41	WTu	KOu	WTu-KOu
Cflar	Vascular	0.481014	1.98311e-39	0.376553	1.47057e-54	WTu	KOu	WTu-KOu
Cflar	CTB	-0.503573	0	-0.415663	0	WTd	KOd	WTd-KOd
Cflar	Stromal	0.566781	1.01673e-36	0.624979	2.66765e-133	WTu	KOu	WTu-KOu
Cgnl1	CTB	-0.472349	0	-0.570507	0	WTd	KOd	WTd-KOd
Cgnl1	STB	0.299547	4.57941e-94	1.06955	0	WTu	KOu	WTu-KOu
Chaserr	Vascular	0.458067	1.64744e-27	0.554354	3.02676e-91	WTu	KOu	WTu-KOu
Chaserr	STB	0.93322	0	0.810899	0	WTu	KOu	WTu-KOu
Chaserr	Stromal	0.781259	9.76132e-77	0.890211	2.07965e-289	WTu	KOu	WTu-KOu
Chaserr	EVT	0.730576	0	0.416281	8.23534e-59	WTu	KOu	WTu-KOu
Chaserr	CTB	-0.913412	0	-0.858732	0	WTd	KOd	WTd-KOd
Chchd3	CTB	-0.92561	0	-0.923024	0	WTd	KOd	WTd-KOd
Chchd3	Stromal	0.499777	4.7304e-42	0.647872	9.46958e-157	WTu	KOu	WTu-KOu
Chchd3	Vascular	0.324919	1.24061e-22	0.599942	3.82924e-104	WTu	KOu	WTu-KOu
Chchd3	EVT	0.945961	0	1.46262	6.438e-220	WTu	KOu	WTu-KOu
Chchd3	STB	0.894805	0	0.823125	0	WTu	KOu	WTu-KOu
Chd1	CTB	-0.462558	0	-0.449672	0	WTd	KOd	WTd-KOd
Chd1	Stromal	0.5111	7.35116e-34	0.353902	2.38211e-79	WTu	KOu	WTu-KOu
Chd1	STB	0.532915	8.11598e-235	0.47856	3.43364e-230	WTu	KOu	WTu-KOu
Chd2	EVT	1.03999	0	0.834015	4.92535e-102	WTu	KOu	WTu-KOu
Chd2	CTB	-1.03384	0	-0.997849	0	WTd	KOd	WTd-KOd
Chd2	Stromal	0.769781	9.8182e-57	0.946281	2.11232e-256	WTu	KOu	WTu-KOu
Chd2	Vascular	0.393562	3.62109e-27	0.444783	2.26745e-53	WTu	KOu	WTu-KOu
Chd2	STB	0.911781	0	1.04104	0	WTu	KOu	WTu-KOu
Chd3	EVT	0.446382	4.37804e-128	1.22793	4.33986e-255	WTu	KOu	WTu-KOu
Chd3	CTB	-0.289022	2.7643e-227	-0.27354	3.19886e-228	WTd	KOd	WTd-KOd
Chd4	EVT	0.296375	2.46158e-139	0.335852	1.33221e-43	WTu	KOu	WTu-KOu
Chd6	STB	1.10125	0	0.860474	0	WTu	KOu	WTu-KOu
Chd6	EVT	0.763698	0	0.719393	4.12484e-116	WTu	KOu	WTu-KOu
Chd6	Vascular	0.727558	2.30176e-55	0.936122	9.81625e-179	WTu	KOu	WTu-KOu
Chd6	Stromal	0.850011	2.96437e-83	1.07892	1.63831e-281	WTu	KOu	WTu-KOu
Chd6	CTB	-1.06121	0	-1.10105	0	WTd	KOd	WTd-KOd
Chd7	Stromal	0.310743	5.35994e-16	0.467647	6.74883e-50	WTu	KOu	WTu-KOu
Chd7	STB	0.897265	3.89543e-128	1.13864	4.55333e-284	WTu	KOu	WTu-KOu
Chd7	Vascular	0.258839	4.99611e-17	0.32724	3.79055e-47	WTu	KOu	WTu-KOu
Chd7	CTB	-0.573507	2.88575e-269	-0.708723	0	WTd	KOd	WTd-KOd
Chd8	Stromal	0.374568	1.09994e-28	0.345076	2.72045e-72	WTu	KOu	WTu-KOu
Chd8	EVT	0.459735	9.84401e-203	0.602731	7.49735e-94	WTu	KOu	WTu-KOu
Chd8	CTB	-0.402323	0	-0.467184	0	WTd	KOd	WTd-KOd
Chd8	STB	0.309505	1.68341e-138	0.538699	5.34275e-275	WTu	KOu	WTu-KOu
Chd9	STB	0.520509	1.28034e-198	0.340341	1.03372e-152	WTu	KOu	WTu-KOu
Chd9	Vascular	1.05822	1.32602e-129	1.14265	2.06011e-302	WTu	KOu	WTu-KOu
Chd9	CTB	-0.838388	0	-0.762955	0	WTd	KOd	WTd-KOd
Chd9	Stromal	1.27679	1.49101e-201	0.722857	1.59161e-163	WTu	KOu	WTu-KOu
Chfr	STB	0.38964	1.93805e-178	0.420745	1.42479e-240	WTu	KOu	WTu-KOu
Chfr	Stromal	0.251758	1.03132e-10	0.279349	3.00486e-62	WTu	KOu	WTu-KOu
Chfr	EVT	0.396719	1.27658e-208	0.468479	8.75583e-84	WTu	KOu	WTu-KOu
Chfr	CTB	-0.404746	0	-0.371318	0	WTd	KOd	WTd-KOd
Chic2	CTB	-0.32949	0	-0.265374	4.14949e-282	WTd	KOd	WTd-KOd
Chka	Vascular	0.259739	3.72716e-14	0.386803	9.51219e-51	WTu	KOu	WTu-KOu
Chka	STB	0.455842	8.72857e-218	0.341147	4.01384e-174	WTu	KOu	WTu-KOu
Chka	Stromal	0.276022	2.69635e-16	0.389068	4.32869e-72	WTu	KOu	WTu-KOu
Chka	CTB	-0.382028	0	-0.382534	0	WTd	KOd	WTd-KOd
Chm	STB	0.501637	6.90465e-249	0.507524	0	WTu	KOu	WTu-KOu
Chm	Stromal	0.421472	1.09782e-39	0.404736	8.90703e-102	WTu	KOu	WTu-KOu
Chm	Vascular	0.366729	1.03496e-17	0.443527	6.42776e-69	WTu	KOu	WTu-KOu
Chm	CTB	-0.49543	0	-0.491695	0	WTd	KOd	WTd-KOd
Chm	EVT	0.388899	2.03544e-197	0.285532	1.26693e-42	WTu	KOu	WTu-KOu
Chmp2a	CTB	0.282695	1.08305e-25	0.313709	1.0322e-14	WTu	KOu	WTu-KOu
Chn1	EVT	0.376375	2.30255e-196	0.675683	0	WTu	KOu	WTu-KOu
Chn2	Vascular	1.66432	0	1.2644	0	WTu	KOu	WTu-KOu
Chn2	Stromal	0.799258	7.53056e-42	0.418889	5.62099e-39	WTu	KOu	WTu-KOu
Chn2	CTB	-0.720078	0	-0.713536	0	WTd	KOd	WTd-KOd
Chn2	STB	0.554955	5.58819e-207	0.396117	1.34922e-118	WTu	KOu	WTu-KOu
Chordc1	STB	0.272617	8.92112e-126	0.359297	3.6613e-205	WTu	KOu	WTu-KOu
Chordc1	CTB	-0.362049	0	-0.262904	5.98725e-286	WTd	KOd	WTd-KOd
Chordc1	Vascular	0.343915	8.54283e-15	0.315027	4.23864e-37	WTu	KOu	WTu-KOu
Chpt1	EVT	0.31418	3.70609e-103	0.761279	3.74966e-108	WTu	KOu	WTu-KOu
Chrdl1	Vascular	1.56724	0	1.26925	4.24434e-300	WTu	KOu	WTu-KOu
Chst11	STB	1.09669	2.90769e-193	1.11243	6.28975e-289	WTu	KOu	WTu-KOu
Chst11	CTB	-1.02042	0	-0.96948	0	WTd	KOd	WTd-KOd
Chst15	Vascular	0.416101	1.85147e-61	0.314422	1.03524e-70	WTu	KOu	WTu-KOu
Chst2	Vascular	0.667736	2.52555e-89	0.406951	3.23392e-94	WTu	KOu	WTu-KOu
Chst8	EVT	0.330235	4.73407e-156	0.771496	0	WTu	KOu	WTu-KOu
Chst9	STB	0.432979	2.21736e-160	0.470236	1.37897e-219	WTu	KOu	WTu-KOu
Chsy1	CTB	-0.307046	8.96568e-232	-0.368406	6.23834e-257	WTd	KOd	WTd-KOd
Chsy3	CTB	-0.878359	3.75591e-274	-0.777274	1.67329e-264	WTd	KOd	WTd-KOd
Chuk	EVT	0.504902	2.73534e-267	0.301978	1.89069e-62	WTu	KOu	WTu-KOu
Chuk	STB	0.396441	8.11512e-198	0.388558	1.12021e-225	WTu	KOu	WTu-KOu
Chuk	CTB	-0.443433	0	-0.385139	0	WTd	KOd	WTd-KOd
Cilk1	Vascular	0.425226	2.83453e-30	0.331908	4.85476e-50	WTu	KOu	WTu-KOu
Cited1	CTB	0.840137	0.0224298	0.813137	3.06765e-22	WTu	KOu	WTu-KOu
Cited2	Vascular	-0.95926	4.65077e-07	-0.862006	1.03697e-14	WTd	KOd	WTd-KOd
Cited2	Stromal	-0.876071	6.01875e-05	-0.824037	1.32007e-22	WTd	KOd	WTd-KOd
Ckap5	Vascular	0.410384	2.04542e-19	0.323845	1.43896e-38	WTu	KOu	WTu-KOu
Ckap5	EVT	0.419802	8.06626e-192	0.439472	6.23161e-71	WTu	KOu	WTu-KOu
Ckap5	Stromal	0.251929	3.13553e-11	0.417695	4.80041e-92	WTu	KOu	WTu-KOu
Ckap5	CTB	-0.482239	0	-0.463574	0	WTd	KOd	WTd-KOd
Ckap5	STB	0.492925	3.00256e-228	0.454051	1.13826e-233	WTu	KOu	WTu-KOu
Ckb	CTB	0.412625	1.33387e-15	0.454925	0.000161429	WTu	KOu	WTu-KOu
Clasp1	EVT	0.601726	1.45904e-224	1.25943	1.63137e-235	WTu	KOu	WTu-KOu
Clasp1	STB	0.649392	1.15204e-281	0.354267	1.11136e-166	WTu	KOu	WTu-KOu
Clasp1	CTB	-0.798742	0	-0.828042	0	WTd	KOd	WTd-KOd
Clasp1	Stromal	0.886615	1.43351e-99	0.643804	1.197e-177	WTu	KOu	WTu-KOu
Clasp1	Vascular	0.745407	1.78467e-70	0.951724	8.10113e-204	WTu	KOu	WTu-KOu
Clasp2	EVT	0.855739	0	0.741759	2.60388e-131	WTu	KOu	WTu-KOu
Clasp2	Stromal	0.96859	2.31329e-115	0.699987	4.3095e-178	WTu	KOu	WTu-KOu
Clasp2	STB	0.565644	2.42475e-259	0.81503	0	WTu	KOu	WTu-KOu
Clasp2	Vascular	0.459423	6.20046e-23	0.820699	5.42827e-146	WTu	KOu	WTu-KOu
Clasp2	CTB	-0.849714	0	-0.886425	0	WTd	KOd	WTd-KOd
Clcn3	EVT	0.33633	6.23611e-145	0.620704	4.41031e-96	WTu	KOu	WTu-KOu
Clcn5	CTB	-0.344578	2.37843e-230	-0.360012	2.67384e-206	WTd	KOd	WTd-KOd
Clcn5	EVT	0.659835	4.03379e-191	1.44174	9.02259e-157	WTu	KOu	WTu-KOu
Cldn5	Vascular	0.850175	1.77744e-236	0.896924	2.32295e-247	WTu	KOu	WTu-KOu
Clec14a	Vascular	1.65719	0	0.841768	5.57104e-297	WTu	KOu	WTu-KOu
Clec16a	EVT	0.396939	1.67963e-194	0.367088	2.63065e-84	WTu	KOu	WTu-KOu
Clec16a	STB	0.594879	1.68798e-300	0.306449	1.57533e-200	WTu	KOu	WTu-KOu
Clec16a	Vascular	0.437282	9.22395e-26	0.398795	1.19258e-49	WTu	KOu	WTu-KOu
Clec16a	Stromal	0.298328	5.72318e-26	0.41489	1.48543e-104	WTu	KOu	WTu-KOu
Clec16a	CTB	-0.529669	0	-0.421895	0	WTd	KOd	WTd-KOd
Clec1a	CTB	-0.370154	3.16683e-154	-0.338779	2.00019e-135	WTd	KOd	WTd-KOd
Clec1a	Vascular	1.72369	0	1.22206	0	WTu	KOu	WTu-KOu
Clec2d	Stromal	0.5943	3.97369e-51	0.972553	4.36229e-253	WTu	KOu	WTu-KOu
Clec2d	Vascular	0.722666	9.51196e-77	0.649316	1.08542e-117	WTu	KOu	WTu-KOu
Clec2d	CTB	-0.650341	0	-0.651079	0	WTd	KOd	WTd-KOd
Clic5	EVT	-0.283772	6.84679e-07	0.406742	6.33142e-51	WTd	KOd	WTd-KOd
Clint1	CTB	-0.710542	0	-0.589818	0	WTd	KOd	WTd-KOd
Clint1	STB	0.629561	2.85179e-212	0.703457	3.12654e-214	WTu	KOu	WTu-KOu
Clint1	EVT	0.796861	2.90273e-249	0.668226	4.61019e-66	WTu	KOu	WTu-KOu
Clint1	Stromal	0.448553	3.67401e-27	0.578322	4.95777e-118	WTu	KOu	WTu-KOu
Clip1	CTB	-0.580287	0	-0.549131	0	WTd	KOd	WTd-KOd
Clip1	Vascular	0.82037	3.80714e-69	0.635038	1.45298e-95	WTu	KOu	WTu-KOu
Clip1	Stromal	0.440074	4.70359e-33	0.536288	1.517e-137	WTu	KOu	WTu-KOu
Clip1	EVT	0.306733	9.99056e-58	1.35025	1.77969e-209	WTu	KOu	WTu-KOu
Clip2	CTB	-0.295855	5.16992e-246	-0.311081	9.60758e-231	WTd	KOd	WTd-KOd
Clip2	EVT	0.46732	1.55823e-188	0.653985	5.89848e-99	WTu	KOu	WTu-KOu
Clk1	EVT	0.97933	0	0.757157	1.40149e-106	WTu	KOu	WTu-KOu
Clk1	STB	1.04611	0	1.00748	0	WTu	KOu	WTu-KOu
Clk1	Stromal	0.820951	3.35357e-80	1.02697	0	WTu	KOu	WTu-KOu
Clk1	Vascular	0.9211	7.67656e-84	0.873878	2.58167e-154	WTu	KOu	WTu-KOu
Clk1	CTB	-1.1543	0	-1.11866	0	WTd	KOd	WTd-KOd
Clk2	CTB	-0.268426	0	-0.299555	0	WTd	KOd	WTd-KOd
Clk4	Stromal	0.415267	3.65387e-32	0.608497	3.04017e-184	WTu	KOu	WTu-KOu
Clk4	STB	0.620442	0	0.695583	0	WTu	KOu	WTu-KOu
Clk4	CTB	-0.785908	0	-0.808036	0	WTd	KOd	WTd-KOd
Clk4	Vascular	0.357038	1.11533e-19	0.483593	3.31816e-70	WTu	KOu	WTu-KOu
Clk4	EVT	0.924776	0	1.3418	1.64844e-302	WTu	KOu	WTu-KOu
Clmp	Stromal	0.275961	2.22776e-25	0.897913	2.45941e-163	WTu	KOu	WTu-KOu
Clmp	CTB	-0.52552	2.26451e-191	-0.34414	2.21703e-130	WTd	KOd	WTd-KOd
Cln3	EVT	0.377267	1.58263e-212	0.342434	3.1976e-51	WTu	KOu	WTu-KOu
Clock	STB	0.541698	4.84883e-259	0.55144	6.68882e-284	WTu	KOu	WTu-KOu
Clock	Stromal	0.436887	2.59164e-43	0.55607	6.92524e-170	WTu	KOu	WTu-KOu
Clock	CTB	-0.63443	0	-0.615941	0	WTd	KOd	WTd-KOd
Clock	Vascular	0.59311	1.23776e-43	0.614494	2.97337e-100	WTu	KOu	WTu-KOu
Clock	EVT	0.586264	4.06581e-260	0.266105	7.53318e-44	WTu	KOu	WTu-KOu
Clptm1l	CTB	0.397203	2.25773e-18	0.450264	1.79548e-06	WTu	KOu	WTu-KOu
Clptm1l	STB	-0.317857	1.26361e-09	-0.446594	8.51848e-06	WTd	KOd	WTd-KOd
Clpx	EVT	0.297911	1.98427e-151	0.284082	9.87645e-44	WTu	KOu	WTu-KOu
Clta	CTB	0.29128	2.2076e-59	0.365803	1.61447e-27	WTu	KOu	WTu-KOu
Clta	STB	-0.377626	9.05435e-11	-0.320843	8.13743e-20	WTd	KOd	WTd-KOd
Clybl	STB	0.563641	2.784e-229	0.676787	5.05219e-269	WTu	KOu	WTu-KOu
Clybl	CTB	-0.726541	0	-0.767117	0	WTd	KOd	WTd-KOd
Clybl	Stromal	0.278373	3.0347e-15	0.536907	1.53233e-119	WTu	KOu	WTu-KOu
Clybl	EVT	1.03747	0	1.72296	0	WTu	KOu	WTu-KOu
Cmip	Vascular	0.966726	5.94556e-121	0.931811	1.26827e-200	WTu	KOu	WTu-KOu
Cmip	CTB	-2.05337	0	-2.0994	0	WTd	KOd	WTd-KOd
Cmip	Stromal	0.933762	4.96497e-96	1.34887	0	WTu	KOu	WTu-KOu
Cmip	STB	0.855613	1.1954e-260	2.6735	0	WTu	KOu	WTu-KOu
Cmss1	STB	-1.11804	0	-1.06876	5.47375e-281	WTd	KOd	WTd-KOd
Cmss1	Vascular	-0.650095	4.75043e-66	-0.707131	2.50873e-128	WTd	KOd	WTd-KOd
Cmss1	EVT	-1.02499	0	-0.995279	2.18234e-77	WTd	KOd	WTd-KOd
Cmss1	Stromal	-0.682247	6.29653e-79	-0.709555	3.42543e-198	WTd	KOd	WTd-KOd
Cmss1	CTB	1.03058	0	0.907359	0	WTu	KOu	WTu-KOu
Cmtm4	EVT	0.254387	7.57428e-37	1.4435	2.22532e-150	WTu	KOu	WTu-KOu
Cmtm8	Vascular	1.0054	1.57907e-152	0.534376	2.18302e-91	WTu	KOu	WTu-KOu
Cnbp	CTB	0.310469	6.76061e-62	0.289149	2.21371e-43	WTu	KOu	WTu-KOu
Cnksr3	CTB	-0.475267	0	-0.383553	0	WTd	KOd	WTd-KOd
Cnksr3	Vascular	0.37568	7.56072e-19	0.470755	8.24363e-92	WTu	KOu	WTu-KOu
Cnksr3	Stromal	0.444046	3.08032e-55	0.561483	1.46429e-241	WTu	KOu	WTu-KOu
Cnn2	STB	-0.435695	2.31067e-05	-0.356301	2.80159e-10	WTd	KOd	WTd-KOd
Cnnm2	STB	1.21066	1.13401e-218	0.329404	8.58395e-140	WTu	KOu	WTu-KOu
Cnnm2	CTB	-0.731546	0	-0.577963	1.68449e-296	WTd	KOd	WTd-KOd
Cnnm2	EVT	0.403233	1.14631e-199	0.719528	1.96364e-131	WTu	KOu	WTu-KOu
Cnot1	STB	0.750299	2.82122e-257	0.871887	0	WTu	KOu	WTu-KOu
Cnot1	Vascular	0.374311	5.17013e-23	0.452858	1.46067e-68	WTu	KOu	WTu-KOu
Cnot1	EVT	0.792109	0	0.627686	1.81086e-71	WTu	KOu	WTu-KOu
Cnot1	CTB	-0.775838	0	-0.741705	0	WTd	KOd	WTd-KOd
Cnot1	Stromal	0.385725	2.71105e-28	0.566674	8.6216e-107	WTu	KOu	WTu-KOu
Cnot10	STB	0.308057	3.37562e-150	0.380615	5.51486e-223	WTu	KOu	WTu-KOu
Cnot10	EVT	0.374913	8.90478e-207	0.339959	1.15208e-61	WTu	KOu	WTu-KOu
Cnot10	Stromal	0.354639	3.87232e-21	0.307203	7.02239e-74	WTu	KOu	WTu-KOu
Cnot10	Vascular	0.364152	5.26592e-22	0.320344	1.55694e-42	WTu	KOu	WTu-KOu
Cnot10	CTB	-0.396328	0	-0.379162	0	WTd	KOd	WTd-KOd
Cnot2	Stromal	0.899505	1.79927e-100	0.653685	1.89004e-162	WTu	KOu	WTu-KOu
Cnot2	EVT	0.532609	8.06663e-273	0.332161	2.59892e-58	WTu	KOu	WTu-KOu
Cnot2	CTB	-0.731824	0	-0.717852	0	WTd	KOd	WTd-KOd
Cnot2	STB	0.592074	2.74284e-256	0.595766	2.64815e-293	WTu	KOu	WTu-KOu
Cnot2	Vascular	0.641365	5.84624e-51	0.744331	3.46897e-125	WTu	KOu	WTu-KOu
Cnot4	EVT	0.88769	0	0.722651	2.08284e-92	WTu	KOu	WTu-KOu
Cnot4	Stromal	0.714522	2.82356e-62	1.11621	0	WTu	KOu	WTu-KOu
Cnot4	STB	1.1417	0	0.940575	0	WTu	KOu	WTu-KOu
Cnot4	CTB	-1.11455	0	-1.12518	0	WTd	KOd	WTd-KOd
Cnot4	Vascular	0.762704	6.76603e-56	0.853697	2.37943e-151	WTu	KOu	WTu-KOu
Cnot6l	EVT	0.439869	7.74485e-155	-0.283838	0.00523764	WTu	KOd	WTu-KOd
Cnot6l	Stromal	0.615191	6.93246e-51	0.317605	2.00811e-63	WTu	KOu	WTu-KOu
Cnot6l	STB	0.48241	1.21495e-181	0.606536	2.86143e-231	WTu	KOu	WTu-KOu
Cnot6l	CTB	-0.554038	0	-0.425571	0	WTd	KOd	WTd-KOd
Cnot6l	Vascular	0.426767	1.10302e-28	0.379142	2.26541e-49	WTu	KOu	WTu-KOu
Cnot7	EVT	0.539861	4.09356e-266	0.930084	5.51854e-173	WTu	KOu	WTu-KOu
Cnot7	CTB	-0.308792	0	-0.336266	0	WTd	KOd	WTd-KOd
Cnst	Vascular	0.457138	8.06775e-37	0.287615	3.78846e-40	WTu	KOu	WTu-KOu
Cntln	Vascular	0.903455	1.00502e-158	0.789109	1.67152e-225	WTu	KOu	WTu-KOu
Cntln	CTB	-0.461925	0	-0.493625	0	WTd	KOd	WTd-KOd
Cntln	STB	0.268981	2.0913e-149	0.41904	3.71801e-289	WTu	KOu	WTu-KOu
Cntln	Stromal	0.448526	4.81074e-44	0.310222	8.11038e-56	WTu	KOu	WTu-KOu
Cntrl	CTB	-0.39713	0	-0.44541	0	WTd	KOd	WTd-KOd
Cntrl	STB	0.286128	5.24814e-138	0.637328	0	WTu	KOu	WTu-KOu
Cntrl	Stromal	0.338898	9.70912e-25	0.353922	5.22731e-58	WTu	KOu	WTu-KOu
Cobll1	Stromal	0.358626	5.6686e-12	1.04105	1.10477e-207	WTu	KOu	WTu-KOu
Cobll1	STB	1.69705	0	1.62387	0	WTu	KOu	WTu-KOu
Cobll1	CTB	-1.13725	0	-1.14269	0	WTd	KOd	WTd-KOd
Cog3	CTB	-0.436295	0	-0.472071	0	WTd	KOd	WTd-KOd
Cog3	Vascular	0.369769	1.70005e-16	0.390732	6.21056e-36	WTu	KOu	WTu-KOu
Cog3	EVT	0.330661	2.03044e-167	0.34859	9.25886e-53	WTu	KOu	WTu-KOu
Cog3	STB	0.392536	5.49538e-190	0.550875	0	WTu	KOu	WTu-KOu
Cog3	Stromal	0.477731	5.44896e-53	0.332439	3.89894e-86	WTu	KOu	WTu-KOu
Cog4	CTB	-0.338593	0	-0.341886	0	WTd	KOd	WTd-KOd
Cog4	EVT	0.373573	3.19449e-212	0.402585	8.78656e-83	WTu	KOu	WTu-KOu
Cog4	Vascular	0.272663	3.3795e-10	0.262505	4.80939e-28	WTu	KOu	WTu-KOu
Cog4	STB	0.262233	1.66406e-121	0.384125	5.21508e-266	WTu	KOu	WTu-KOu
Cog5	Vascular	0.817999	9.52736e-82	0.735603	4.27261e-117	WTu	KOu	WTu-KOu
Cog5	STB	0.845982	0	1.06393	0	WTu	KOu	WTu-KOu
Cog5	Stromal	0.433539	3.56487e-33	0.749164	1.72258e-194	WTu	KOu	WTu-KOu
Cog5	EVT	0.993829	0	0.795272	2.91702e-130	WTu	KOu	WTu-KOu
Cog5	CTB	-0.988456	0	-0.988828	0	WTd	KOd	WTd-KOd
Col12a1	Stromal	0.685866	1.34346e-25	0.679466	5.09882e-27	WTu	KOu	WTu-KOu
Col18a1	Vascular	0.990884	2.0603e-147	0.863702	1.03106e-231	WTu	KOu	WTu-KOu
Col4a1	Vascular	0.801614	1.43446e-50	0.490743	7.25666e-39	WTu	KOu	WTu-KOu
Col4a2	EVT	0.35038	3.78943e-34	-1.11671	1.84811e-05	WTu	KOd	WTu-KOd
Col4a2	Vascular	0.898169	7.98304e-58	0.475877	4.23064e-37	WTu	KOu	WTu-KOu
Col5a2	Stromal	0.723678	1.3151e-24	0.866824	1.5656e-91	WTu	KOu	WTu-KOu
Col5a2	CTB	-0.465736	9.81545e-121	-0.38038	7.98431e-95	WTd	KOd	WTd-KOd
Colec12	STB	0.408824	4.01884e-70	0.701002	2.04272e-101	WTu	KOu	WTu-KOu
Colec12	CTB	-0.52308	1.97534e-205	-0.360783	8.08108e-127	WTd	KOd	WTd-KOd
Commd10	EVT	0.650426	0	0.658487	5.32267e-119	WTu	KOu	WTu-KOu
Commd10	CTB	-0.477559	0	-0.505464	0	WTd	KOd	WTd-KOd
Commd10	STB	0.322894	3.39824e-153	0.605899	0	WTu	KOu	WTu-KOu
Commd10	Stromal	0.261973	4.7507e-19	0.338563	2.44714e-64	WTu	KOu	WTu-KOu
Comt	STB	0.290702	4.5265e-146	0.28959	1.22718e-158	WTu	KOu	WTu-KOu
Comt	CTB	-0.297608	4.32156e-271	-0.27905	8.53388e-257	WTd	KOd	WTd-KOd
Comt	Stromal	0.309169	6.40274e-17	0.295602	1.26886e-57	WTu	KOu	WTu-KOu
Cop1	CTB	-0.882623	0	-0.860813	0	WTd	KOd	WTd-KOd
Cop1	STB	0.785388	0	0.714226	0	WTu	KOu	WTu-KOu
Cop1	Stromal	0.85622	1.47947e-90	0.812692	1.59483e-240	WTu	KOu	WTu-KOu
Cop1	Vascular	0.744643	4.51115e-59	0.829974	5.22686e-165	WTu	KOu	WTu-KOu
Cop1	EVT	0.678883	0	0.392392	3.21691e-53	WTu	KOu	WTu-KOu
Copa	CTB	-0.311385	0	-0.27754	2.89098e-231	WTd	KOd	WTd-KOd
Copb2	CTB	0.297628	5.3697e-62	0.376536	3.34049e-22	WTu	KOu	WTu-KOu
Copg2	Stromal	0.674648	2.85228e-64	0.459829	3.75631e-93	WTu	KOu	WTu-KOu
Copg2	CTB	-0.638147	0	-0.695927	0	WTd	KOd	WTd-KOd
Copg2	STB	0.409382	5.54776e-169	0.545352	3.53053e-293	WTu	KOu	WTu-KOu
Copg2	Vascular	0.853004	5.33127e-84	0.902747	4.3725e-186	WTu	KOu	WTu-KOu
Copg2	EVT	0.505664	1.38519e-234	0.552881	1.62188e-84	WTu	KOu	WTu-KOu
Coro2a	CTB	-0.341819	9.29285e-228	-0.300308	1.96717e-182	WTd	KOd	WTd-KOd
Coro2b	Vascular	0.991533	0	0.867093	0	WTu	KOu	WTu-KOu
Coro7	EVT	0.447235	5.08674e-283	0.379584	2.62343e-65	WTu	KOu	WTu-KOu
Coro7	CTB	-0.305111	0	-0.366245	0	WTd	KOd	WTd-KOd
Cotl1	Stromal	0.27285	8.96575e-20	0.269366	3.71752e-32	WTu	KOu	WTu-KOu
Cox10	EVT	0.30561	2.12455e-171	0.456241	1.00013e-132	WTu	KOu	WTu-KOu
Cox5a	STB	-0.276069	2.79441e-13	-0.384117	1.64681e-08	WTd	KOd	WTd-KOd
Cox5a	CTB	0.305308	7.07681e-34	0.36836	1.592e-19	WTu	KOu	WTu-KOu
Cox6a1	STB	-0.37867	8.09883e-11	-0.439725	2.54324e-07	WTd	KOd	WTd-KOd
Cox6a1	CTB	0.373646	4.06291e-24	0.464643	7.68657e-09	WTu	KOu	WTu-KOu
Cox6b1	CTB	0.462768	7.47596e-15	0.463757	4.63208e-05	WTu	KOu	WTu-KOu
Cox6b1	STB	-0.44671	6.85885e-06	-0.387429	3.94342e-07	WTd	KOd	WTd-KOd
Cox6c	CTB	0.411004	2.27424e-21	0.460186	4.7719e-07	WTu	KOu	WTu-KOu
Cox6c	STB	-0.490078	0.0414094	-0.460343	0.000293353	WTd	KOd	WTd-KOd
Cox7a2	CTB	0.320668	1.67428e-31	0.331456	4.26927e-19	WTu	KOu	WTu-KOu
Cox7a2l	CTB	0.366666	5.10618e-31	0.364031	1.44312e-23	WTu	KOu	WTu-KOu
Cox7a2l	STB	-0.311161	5.82415e-17	-0.369303	3.24369e-09	WTd	KOd	WTd-KOd
Cox7b	CTB	0.282733	6.30554e-32	0.322254	2.35324e-15	WTu	KOu	WTu-KOu
Cox7b	STB	-0.308053	3.00989e-10	-0.366153	1.15462e-05	WTd	KOd	WTd-KOd
Cpeb1	EVT	0.298751	3.1416e-120	0.828901	0	WTu	KOu	WTu-KOu
Cpeb2	EVT	0.268695	2.93024e-120	0.67046	1.64412e-129	WTu	KOu	WTu-KOu
Cpeb3	CTB	-0.350392	0	-0.322174	0	WTd	KOd	WTd-KOd
Cpeb3	Stromal	0.311776	4.24407e-12	0.475565	1.08268e-135	WTu	KOu	WTu-KOu
Cped1	Stromal	1.43649	5.02888e-106	1.75911	0	WTu	KOu	WTu-KOu
Cped1	CTB	-1.2018	0	-1.11745	0	WTd	KOd	WTd-KOd
Cplane1	Stromal	0.53358	3.31633e-41	0.554569	1.24177e-153	WTu	KOu	WTu-KOu
Cplane1	CTB	-0.615654	0	-0.613186	0	WTd	KOd	WTd-KOd
Cplane1	EVT	0.483698	6.37869e-237	0.508263	2.67433e-93	WTu	KOu	WTu-KOu
Cplane1	Vascular	0.557526	1.82312e-47	0.644453	7.79077e-121	WTu	KOu	WTu-KOu
Cplane1	STB	0.573015	4.18973e-261	0.443759	2.08839e-236	WTu	KOu	WTu-KOu
Cpne8	CTB	-0.377572	0	-0.354369	0	WTd	KOd	WTd-KOd
Cpne8	Vascular	0.821501	8.73666e-107	0.575097	9.25181e-151	WTu	KOu	WTu-KOu
Cpq	Stromal	0.829142	4.96756e-165	0.303533	1.27344e-74	WTu	KOu	WTu-KOu
Cpsf6	EVT	0.444817	3.46699e-180	0.339112	2.1023e-38	WTu	KOu	WTu-KOu
Cpsf6	STB	0.705463	0	0.504473	1.50533e-262	WTu	KOu	WTu-KOu
Cpsf6	CTB	-0.685866	0	-0.641341	0	WTd	KOd	WTd-KOd
Cpsf6	Stromal	0.690351	5.81046e-71	0.618292	1.17439e-165	WTu	KOu	WTu-KOu
Cpsf6	Vascular	0.541652	7.67526e-37	0.641994	7.83292e-113	WTu	KOu	WTu-KOu
Cpsf7	EVT	0.288121	1.5841e-142	0.38978	2.50244e-65	WTu	KOu	WTu-KOu
Cpsf7	CTB	-0.484119	0	-0.422747	0	WTd	KOd	WTd-KOd
Cpsf7	STB	0.528893	1.30163e-256	0.348325	2.53614e-225	WTu	KOu	WTu-KOu
Cpsf7	Vascular	0.387755	7.95519e-22	0.294013	1.7556e-49	WTu	KOu	WTu-KOu
Cpsf7	Stromal	0.495346	1.68888e-49	0.442057	5.09299e-106	WTu	KOu	WTu-KOu
Cr1l	Vascular	0.587776	2.2246e-42	0.409969	1.87598e-57	WTu	KOu	WTu-KOu
Cradd	STB	0.353505	2.53827e-183	0.481948	0	WTu	KOu	WTu-KOu
Cradd	Vascular	0.587528	1.36093e-42	0.506189	2.78378e-101	WTu	KOu	WTu-KOu
Cradd	CTB	-0.486099	0	-0.473491	0	WTd	KOd	WTd-KOd
Cradd	Stromal	0.538999	3.9839e-47	0.383721	3.21612e-73	WTu	KOu	WTu-KOu
Cramp1l	CTB	-0.427779	0	-0.491831	0	WTd	KOd	WTd-KOd
Cramp1l	Vascular	0.476689	3.82466e-21	0.351065	3.92793e-46	WTu	KOu	WTu-KOu
Cramp1l	EVT	0.424814	1.02944e-187	0.811198	6.66021e-140	WTu	KOu	WTu-KOu
Cramp1l	STB	0.399704	9.18153e-160	0.532	3.13525e-231	WTu	KOu	WTu-KOu
Creb1	EVT	0.355093	1.4268e-163	0.338998	2.58139e-62	WTu	KOu	WTu-KOu
Creb1	Vascular	0.649129	3.52578e-35	0.621444	6.2164e-107	WTu	KOu	WTu-KOu
Creb1	Stromal	0.748059	7.83179e-75	0.599319	7.65524e-142	WTu	KOu	WTu-KOu
Creb1	STB	0.599976	8.04095e-267	0.491968	6.76997e-229	WTu	KOu	WTu-KOu
Creb1	CTB	-0.634098	0	-0.622904	0	WTd	KOd	WTd-KOd
Creb3	STB	-0.288464	8.81094e-10	-0.341945	1.15861e-09	WTd	KOd	WTd-KOd
Creb3	CTB	0.285748	1.22496e-32	0.424584	8.04044e-09	WTu	KOu	WTu-KOu
[truncated: 8,516 more rows]
