# Supplementary material for: Single-Cell Transcriptional Response of the Placenta to the Ablation of Caveolin-1: Insights into the Adaptive Regulation of Brain–Placental Axis in Mice
Source: Cells. 2024 Jan 24;13(3):215. doi: 10.3390/cells13030215 (PMC10854826; doi:10.3390/cells13030215)
Supplement: Supplementary file 1 [file cells-13-00215-s001.zip › Supplemenatry Table S2.xlsx]

## Sheet: Sheet1
List of signficant GO terms.
GO ID	GO term	Number of cell-specific differentially expressed genes	Fold Enrichment	p-adj (FDR)
GO:0048667	cell morphogenesis involved in neuron differentiation	7	8.14	0.0382
GO:0031175	neuron projection development	9	6.62	0.017
GO:0048666	neuron development	9	5.4	0.0461
GO:0030182	neuron differentiation	10	4.84	0.0434
GO:0048699	generation of neurons	10	4.53	0.0476
