# Supplementary material for: Single-Cell Transcriptional Response of the Placenta to the Ablation of Caveolin-1: Insights into the Adaptive Regulation of Brain–Placental Axis in Mice
Source: Cells. 2024 Jan 24;13(3):215. doi: 10.3390/cells13030215 (PMC10854826; doi:10.3390/cells13030215)
Supplement: Supplementary file 1 [file cells-13-00215-s001.zip › Supplemenatry Table S3.xlsx]

## Sheet: Sheet1
List of genes differentially expressed in the EVT or the STB cells in the KO compared to the WT mice.
Gene	cell type	avg_log2FC.WT	p_val_adj.WT	avg_log2FC.KO	p_val_adj.KO	Pattern
Adgrg1	EVT	-0.378771	0.000913962	0.526974	2.00908e-65	Wd/Ku
Aplp2	EVT	-0.389778	0.00455492	0.270225	3.42054e-13	Wd/Ku
Cd9	EVT	-0.322563	0.0445347	0.741583	4.66945e-38	Wd/Ku
Clic5	EVT	-0.283772	6.84679e-07	0.406742	6.33142e-51	Wd/Ku
Sdc4	EVT	-0.262226	6.52297e-13	0.468918	8.92938e-53	Wd/Ku
Rflnb	EVT	-0.430655	0.0305023	0.413474	1.9432e-46	Wd/Ku
Rgcc	EVT	-0.271385	2.46989e-08	0.308942	2.81451e-51	Wd/Ku
Slc16a1	EVT	-0.32411	5.65501e-09	0.651137	3.00451e-55	Wd/Ku
Slc39a14	EVT	-0.261114	8.20407e-10	0.268656	2.18386e-43	Wd/Ku
Slc40a1	EVT	-0.400888	4.72324e-05	0.468961	4.46947e-52	Wd/Ku
Slc45a4	EVT	-0.298453	5.55522e-09	0.287185	5.64639e-50	Wd/Ku
Vnn1	EVT	-0.310417	0.000195792	0.344202	6.33017e-50	Wd/Ku
Cyfip2	STB	-0.263946	0.00162873	0.996784	0	Wd/Ku
Phactr1	STB	-0.3963	1.54385e-07	1.23506	1.1942e-215	Wd/Ku
Plxna2	STB	-0.269798	0.0108323	0.275157	2.2087e-62	Wd/Ku
Ptprf	STB	-0.336188	0.000156748	0.532656	4.85389e-122	Wd/Ku
Ptprm	STB	-0.463762	2.23095e-06	2.34087	0	Wd/Ku
Sema4d	STB	-0.326523	0.00633234	0.680865	2.10069e-255	Wd/Ku
Tfap2c	STB	-0.409058	1.4938e-06	0.849027	6.86299e-241	Wd/Ku
Car2	STB	-1.06706	5.50222e-13	0.597431	1.45318e-27	Wd/Ku
Ctnnbip1	STB	-0.411602	1.11265e-07	0.438801	1.86731e-168	Wd/Ku
Ddb1	STB	-0.322239	0.000100404	0.3303	8.75759e-53	Wd/Ku
Flt1	STB	-1.08736	5.18749e-152	0.987025	4.20976e-32	Wd/Ku
Gnai3	STB	-0.291052	2.75745e-19	0.428518	2.34329e-110	Wd/Ku
Lasp1	STB	-0.424748	0.000507954	0.305355	4.37064e-75	Wd/Ku
Mgat4a	STB	-0.414581	0.000282505	0.781557	1.3234e-84	Wd/Ku
Mpzl1	STB	-0.317078	2.68133e-14	0.82984	6.59532e-157	Wd/Ku
Mpzl2	STB	-0.260663	0.000127727	0.265283	3.35768e-78	Wd/Ku
Noct	STB	-0.399954	0.0134548	0.71997	1.02794e-156	Wd/Ku
Nrk	STB	-0.80126	2.10767e-82	0.521345	9.66618e-29	Wd/Ku
Pappa2	STB	-1.26741	1.95802e-147	2.15877	3.36088e-147	Wd/Ku
Peg3	STB	-0.813895	3.40464e-31	0.710232	8.29215e-82	Wd/Ku
Phactr2	STB	-0.306112	1.29504e-14	0.505086	9.66558e-133	Wd/Ku
Pitrm1	STB	-0.286175	1.35883e-23	1.24228	0	Wd/Ku
Ralb	STB	-0.392391	2.3215e-07	0.378868	2.68777e-107	Wd/Ku
Reps2	STB	-0.274074	0.026651	0.561529	2.60346e-129	Wd/Ku
Tiam2	STB	-0.251717	0.000119941	2.32057	0	Wd/Ku
Tmeff1	STB	-0.271498	1.55555e-06	0.680229	7.51964e-243	Wd/Ku
Tnfrsf9	STB	-1.06374	2.70564e-22	0.643719	1.01457e-52	Wd/Ku
